# Supplementary material for: A new type of δ-vinylvalerolactone for palladium-catalyzed cycloaddition: synthesis of nine-membered heterocycles
Source: Royal Society of Chemistry journal article supplement (doi:10.1039/d2cc01134d), 2022-01-01
Supplement: d2cc01134d1.pdf [file d2cc01134d1.pdf]

## Electronic Supplementary Information

# A New Type of $\delta$ -Vinylvalerolactones for Palladium-Catalyzed Cycloaddition: Synthesis of Nine-Membered Heterocycles

Kuan Li,<sup>a</sup> Sen Yang,<sup>a</sup> Bing Zheng,<sup>\*a</sup> Wei Wang,<sup>b</sup> Yongjun Wu,<sup>b</sup> Jing Li,<sup>a</sup> and  
Hongchao Guo<sup>\*a</sup>

<sup>a</sup> Department of Chemistry and Innovation Center of Pesticide Research, China Agricultural University, Beijing 100193, China. E-mail: hchgao@cau.edu.cn, 2014026@cau.edu.cn

<sup>b</sup> College of Public Health, Zhengzhou University, Zhengzhou 450001, China

### Table of Contents

|                                                                         |     |
|-------------------------------------------------------------------------|-----|
| General Information                                                     | S2  |
| Synthesis of $\delta$ -Vinylvalerolactones <b>1</b>                     | S2  |
| General Procedure A for Palladium-Catalyzed [6+3] Cycloaddition         | S3  |
| General Procedure B for Palladium-Catalyzed [6+3] Cycloaddition         | S3  |
| General Procedure for Scale-up Reaction                                 | S3  |
| General Procedure for Further Transformations                           | S4  |
| A Plausible Mechanism                                                   | S4  |
| Characterization Data of the Compounds <b>1</b> , <b>3</b> and <b>4</b> | S5  |
| NMR Spectra of the Compounds <b>1</b> , <b>3</b> and <b>4</b>           | S25 |
| X-Ray Crystallographic Data                                             | S65 |

## General Information

All reactions were performed in Schlenk tubes under an atmosphere of argon using oven-dried glassware. Commercially obtained reagents were used without further purification, unless otherwise noted. Trichloromethane ( $\text{CHCl}_3$ ) was distilled over  $\text{P}_2\text{O}_5$  and stored over 3 Å type molecular sieves. Tetrahydrofuran (THF) and toluene were distilled freshly before use over sodium and benzophenone. Acetonitrile (MeCN), Dichloromethane (DCM) and 1,2-dichloroethane (DCE) were distilled from  $\text{CaH}_2$ . Reactions were checked for completion by TLC analysis and plates were visualized with short-wave UV light (254 nm). The  $^1\text{H}$ ,  $^{13}\text{C}$  and  $^{19}\text{F}$  NMR spectra were obtained in  $\text{CDCl}_3$  using a Bruker-BioSpin AVANCE III HD NMR spectrometer at 500, 125 and 470 MHz, respectively. Chemical shifts are reported in parts per million ( $\delta$  value) calibrated against the residual solvent peak. Signal patterns are indicated as follows: s, singlet; d, doublet; t, triplet; q, quartet; m, multiplet. Coupling constants ( $J$ ) are given in hertz (Hz). The infrared spectra were recorded on a Bruker VERTEX 70 IR spectrometer as KBr pellets, with absorption reported in  $\text{cm}^{-1}$ . High-resolution mass spectra were recorded on a Bruker Impact II UHR TOF LC/MS Mass Spectrometry. Melting points were determined on a Stuard SMP3 melting point apparatus. X-ray crystallographic data were collected using a MM007HF Saturn724+.

## Synthesis of $\delta$ -Vinylvalerolactones **1**

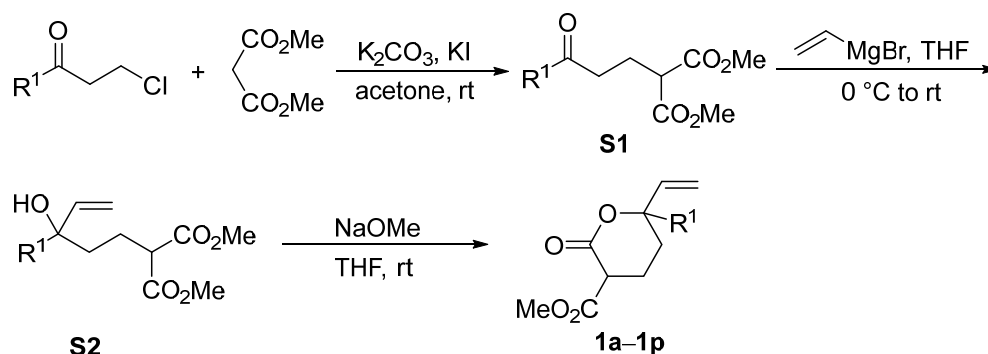

A solution of 3-chloropropiophenone<sup>1-2</sup> (1.0 equiv.) and dimethyl malonate (2.5 equiv.),  $\text{K}_2\text{CO}_3$  (1.0 equiv.), KI (0.1 equiv.) in acetone was stirred at 25 °C for 12 h. the insoluble solid was filtered off and the filtrate was concentrated under reduced pressure. The residue was purified by flash chromatography on silica gel (Ethyl acetate/Petroleum ether = 1:6) to obtain the crude product **S1** containing dimethyl malonate.

The required Grignard reagent (3.0 equiv.) was added dropwise to a solution of the crude product **S1** (1.0 equiv.) in anhydrous THF at 0 °C under argon atmosphere. The resulting

<sup>1</sup> J. Wang, Y.-B. Pang, N. Tao, R.-S. Zeng and Y. Zhao, *J. Org. Chem.*, 2019, **84**, 15315–15322.

<sup>2</sup> H. Uno, T. Imai, K. Harada and N. Shibata, *ACS Catal.*, 2020, **10**, 1454–1459.

mixture was stirred at 25 °C for 12 h. The reaction was quenched with aq. NH<sub>4</sub>Cl and the organic layer was separated. The aqueous layer was extracted with EtOAc (3×100 mL). The combined organic layers were washed with brine (1×100 mL), dried over MgSO<sub>4</sub>, and concentrated under reduced pressure. The residue was purified by flash chromatography on silica gel (Ethyl acetate/Petroleum ether = 1:6) to obtain the product **S2**.

A solution of **S2** (1.0 equiv.) and sodium methoxide (2.0 equiv.) in THF was stirred at 25 °C for 12 h. The reaction was concentrated under reduced pressure. The residue was purified by flash chromatography on silica gel (Ethyl acetate/Petroleum ether = 1:6) to obtain the desired  $\delta$ -vinylvalerolactones **1**.

#### **General Procedure A for Palladium-Catalyzed [6+3] Cycloaddition of $\delta$ -Vinylvalerolactones **1** with Azomethine Imines **2**<sup>3-4</sup>**

To an oven-dried 25 mL of Schlenk tube equipped with a stir bar, Pd<sub>2</sub>dba<sub>3</sub>·CHCl<sub>3</sub> (5 mol%) and 1,10-Phen (20 mol%) was added along with  $\delta$ -vinylvalerolactones **1** (0.15 mmol), azomethine imines **2** (0.1 mmol) and DCM (1.0 mL). The reaction was stirring at 25 °C under argon atmosphere until consumption of azomethine imines **2** as monitored by thin layer chromatography. The solution directly purified by silica gel column chromatography (Ethyl acetate/Petroleum ether = 1:1) to afford desired cycloadducts **3**.

#### **General Procedure B for Palladium-Catalyzed [6+3] Cycloaddition of $\delta$ -Vinylvalerolactones **1** with Azomethine Imines **2****

To an oven-dried 25 mL of Schlenk tube equipped with a stir bar, Pd<sub>2</sub>dba<sub>3</sub>·CHCl<sub>3</sub> (5 mol%) and 1,10-Phen (20 mol%) was added along with  $\delta$ -vinylvalerolactones **1** (0.15 mmol), azomethine imines **2** (0.1 mmol) and CHCl<sub>3</sub> (1.0 mL). The reaction was stirring at 50 °C under argon atmosphere until consumption of azomethine imines **2** as monitored by thin layer chromatography. The solution directly purified by silica gel column chromatography (Ethyl acetate/Petroleum ether = 1:1) to afford desired cycloadducts **3**.

#### **General Procedure for Scale-up Reaction**

To an oven-dried 50 mL of Schlenk tube equipped with a stir bar, Pd<sub>2</sub>dba<sub>3</sub>·CHCl<sub>3</sub> (5 mol%) and 1,10-Phen (20 mol%) was added along with  $\delta$ -vinylvalerolactones **1** (1.5 mmol), azomethine imines **2** (1.0 mmol) and DCM (10.0 mL). The reaction was stirring at 25 °C under argon atmosphere until consumption of azomethine imines **2** as monitored by thin layer chromatography. The solution directly purified by silica gel column chromatography (Ethyl acetate/Petroleum ether = 1:1) to afford desired cycloadducts **3**.

---

<sup>3</sup> T. Wang, J. Luo, C. Gu, R. Li, X. Tang, D. Yu and J. Li, CN 103172575A.

<sup>4</sup> T. Wang, A.-L. Shao, H.-Y. Feng, S.-W. Yang, M. Gao, J. Tian and A.-W. Lei, *Tetrahedron.*, 2015, **71**, 4473–4477.

### General Procedure for Further Transformation of the Product 3

Under argon atmosphere, the DIBAL (1.5 M in toluene, 10.0 equiv) was added dropwise to a solution of **3** (0.1 mmol) in dry DCM (1.5 mL) at  $-78\text{ }^{\circ}\text{C}$ , and the resulting solution continued to be stirred at  $-78\text{ }^{\circ}\text{C}$  for 2 h. The reaction was quenched with 1 N HCl (10.0 mL) and the organic layer was separated. The aqueous layer was extracted with DCM ( $3\times 10.0\text{ mL}$ ). The combined organic layers were washed with brine ( $2\times 10.0\text{ mL}$ ), dried over  $\text{MgSO}_4$ , and concentrated under reduced pressure. The resulting solid in DCM (1.5 mL) was added  $\text{Et}_3\text{N}$  (0.3 mmol) and benzoyl chloride (0.3 mmol) at room temperature for one hour. The solution directly purified by silica gel column chromatography (Ethyl acetate/Petroleum ether = 1:5) to afford desired cycloadduct **4**.

### General Procedure for Further Transformation of the Product 4

The cycloadduct **4a** (0.1 mmol, 59.1 mg) in dry MeOH (5 mL) was added KOH (10equiv. 50.4 mg). Then the mixture was stirring under refluxing conditions for 3 h. The solvent was removed under reduced pressure and the resulting residue was mixed with 25 mL of  $\text{H}_2\text{O}$ . The mixture was extracted with ethyl acetate ( $3\times 20\text{ mL}$ ). The combined organic layers were washed with brine ( $2\times 10\text{ mL}$ ), dried over  $\text{MgSO}_4$ , and concentrated under reduced pressure. The residue was purified by silica gel column chromatography (Ethyl acetate/Petroleum ether = 1:1) to afford the desired cycloadduct **5a**.

### A Plausible Mechanism

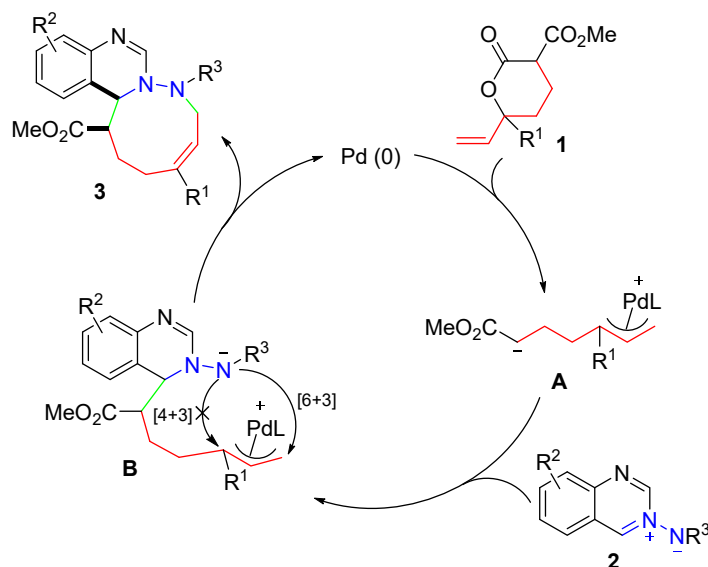

In the presence of a Pd catalyst,  $\delta$ -vinylvalerolactone **1** performs a decarboxylation ring-opening reaction to afford zwitterionic the intermediate **A**, which attacks the azomethine imine **2** to give the intermediate **B**. Subsequent intramolecular annulation led to a [6+3] annulation product **3**. In this reaction, no [4+3] cycloaddition product was observed. It is probably because there a big steric hindrance when nitrogen anion attacks the carbon linking to  $\text{R}^1$  group.

## Characterization Data for the Compounds 1, 3 and 4

### Methyl 2-oxo-6-phenyl-6-vinyltetrahydro-2H-pyran-3-carboxylate

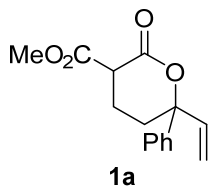

**1a** was obtained as light yellow oil, dr = 1:1.  $^1\text{H}$  NMR (500 MHz,  $\text{CDCl}_3$ ):  $\delta$  = 7.43–7.34 (m, 8H), 7.34–7.28 (m, 2H), 6.12–6.00 (m, 2H), 5.38–5.24 (m, 4H), 3.78 (s, 3H), 3.73 (s, 3H), 3.63–3.57 (t,  $J$  = 7.5 Hz, 1H), 3.45–3.38 (t,  $J$  = 7.5 Hz, 1H), 2.46–2.27 (m, 4H), 2.26–1.97 (m, 4H).  $^{13}\text{C}$  NMR ( $\text{CDCl}_3$ , 125 MHz):  $\delta$  = 169.6, 169.5, 167.0, 166.8, 141.9, 141.7, 140.4, 140.3, 128.8, 128.6, 128.0, 127.9, 125.2, 125.1, 115.6, 115.4, 87.6, 87.4, 52.8, 52.8, 46.9, 31.2, 31.0, 20.8, 20.7. IR (KBr):  $\nu$  ( $\text{cm}^{-1}$ ) 2988, 2954, 1723, 1448, 1261, 1028, 930, 764, 750, 701. HRMS (ESI,  $m/z$ ) calcd for  $\text{C}_{15}\text{H}_{16}\text{O}_4\text{Na}$   $[\text{M}+\text{Na}]^+$ : 283.0947, found: 283.0943.

### Methyl 2-oxo-6-(*m*-tolyl)-6-vinyltetrahydro-2H-pyran-3-carboxylate

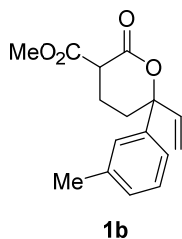

**1b** was obtained as light yellow oil, dr = 1:1.  $^1\text{H}$  NMR (500 MHz,  $\text{CDCl}_3$ )  $\delta$  = 7.28–7.24 (m, 2H), 7.23–7.20 (m, 2H), 7.20–7.15 (m, 2H), 7.15–7.09 (m, 2H), 6.12–5.98 (m, 2H), 5.39–5.21 (m, 4H), 3.78 (s, 3H), 3.74 (s, 3H), 3.65–3.52 (t,  $J$  = 7.5 Hz, 1H), 3.45–3.39 (t,  $J$  = 7.5 Hz, 1H), 2.40–2.26 (m, 10H), 2.24–2.00 (m, 4H).  $^{13}\text{C}$  NMR (125 MHz,  $\text{CDCl}_3$ )  $\delta$  = 169.6, 169.6, 167.1, 166.9, 141.8, 141.6, 140.5, 140.4, 138.6, 138.4, 128.8, 128.7, 128.6, 128.5, 125.9, 125.7, 122.2, 122.0, 115.5, 115.2, 87.6, 87.4, 52.8, 46.9, 31.2, 31.0, 21.6, 20.8, 20.7. IR (KBr):  $\nu$  ( $\text{cm}^{-1}$ ) 2991, 2954, 1729, 1275, 1261, 1161, 764, 750, 705. HRMS (ESI,  $m/z$ ) calcd for  $\text{C}_{16}\text{H}_{18}\text{O}_4\text{Na}$   $[\text{M}+\text{Na}]^+$ : 297.1103, found: 297.1100.

**Methyl 2-oxo-6-(*p*-tolyl)-6-vinyltetrahydro-2H-pyran-3-carboxylate**

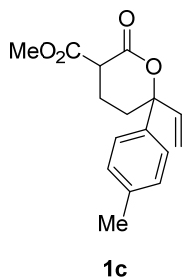

**1c** was obtained as light yellow oil, dr = 1:1.  $^1\text{H}$  NMR (500 MHz,  $\text{CDCl}_3$ )  $\delta$  = 7.32–7.24 (m, 4H), 7.22–7.13 (m, 4H), 6.11–5.94 (m, 2H), 5.37–5.18 (m, 4H), 3.77 (s, 3H), 3.72 (s, 3H), 3.62–3.56 (t,  $J$  = 7.5 Hz, 1H), 3.44–3.37 (t,  $J$  = 7.5 Hz, 1H), 2.42–2.23 (m, 10H), 2.23–1.97 (m, 4H).  $^{13}\text{C}$  NMR (125 MHz,  $\text{CDCl}_3$ )  $\delta$  = 169.7, 169.6, 167.1, 166.9, 140.6, 140.5, 138.9, 138.7, 137.8, 137.7, 129.5, 129.3, 125.2, 125.0, 115.4, 115.1, 87.6, 87.5, 52.8, 47.0, 46.9, 31.2, 30.9, 21.0, 20.9, 20.7. IR (KBr):  $\nu$  ( $\text{cm}^{-1}$ ) 2991, 2953, 1724, 1275, 1261, 1160, 930, 817, 764, 750. HRMS (ESI,  $m/z$ ) calcd for  $\text{C}_{16}\text{H}_{18}\text{O}_4\text{Na}$   $[\text{M}+\text{Na}]^+$ : 297.1103, found: 297.1100.

**Methyl 6-(4-methoxyphenyl)-2-oxo-6-vinyltetrahydro-2H-pyran-3-carboxylate**

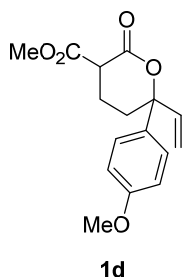

**1d** was obtained as light yellow oil, dr = 1:1.  $^1\text{H}$  NMR (500 MHz,  $\text{CDCl}_3$ )  $\delta$  = 7.36–7.27 (m, 4H), 6.95–6.83 (m, 4H), 6.12–5.93 (m, 2H), 5.39–5.18 (m, 4H), 3.83–3.79 (m, 6H), 3.78 (s, 3H), 3.74 (s, 3H), 3.63–3.56 (t,  $J$  = 7.5 Hz, 1H), 3.44–3.38 (t,  $J$  = 7.5 Hz, 1H), 2.41–2.26 (m, 4H), 2.22–2.03 (m, 4H).  $^{13}\text{C}$  NMR (125 MHz,  $\text{CDCl}_3$ )  $\delta$  = 169.6, 169.6, 167.1, 166.9, 159.3, 159.2, 140.7, 140.6, 133.8, 133.6, 126.6, 126.5, 115.4, 115.1, 114.1, 113.9, 87.5, 87.3, 55.3, 55.3, 52.8, 52.8, 46.9, 31.1, 30.8, 20.9, 20.8. IR (KBr):  $\nu$  ( $\text{cm}^{-1}$ ) 2960, 2845, 1724, 1513, 1275, 1259, 1181, 764, 750. HRMS (ESI,  $m/z$ ) calcd for  $\text{C}_{16}\text{H}_{18}\text{O}_5\text{Na}$   $[\text{M}+\text{Na}]^+$ : 313.1052, found: 313.1049.

**Methyl 6-(3,4-dimethoxyphenyl)-2-oxo-6-vinyltetrahydro-2H-pyran-3-carboxylate**

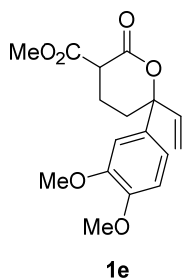

**1e** was obtained as light yellow oil, dr = 1:1.  $^1\text{H}$  NMR (500 MHz,  $\text{CDCl}_3$ )  $\delta$  = 7.01–6.79 (m, 6H), 6.11–5.93 (m, 2H), 5.39–5.21 (m, 4H), 3.95–3.83 (m, 12H), 3.79 (s, 3H), 3.74 (s, 3H), 3.65–3.56 (t,  $J$  = 7.5 Hz, 1H), 3.48–3.37 (t,  $J$  = 8.0 Hz, 1H), 2.42–2.25 (m, 4H), 2.25–2.01 (m, 4H).  $^{13}\text{C}$  NMR (125 MHz,  $\text{CDCl}_3$ )  $\delta$  = 169.6, 167.1, 166.9, 149.2, 149.0, 148.8, 148.7, 140.6, 140.5, 134.3, 134.1, 117.5, 117.3, 115.4, 115.2, 111.0, 110.9, 109.0, 108.8, 87.5, 87.3, 56.1, 56.0, 55.9, 52.9, 52.8, 46.9, 46.9, 31.2, 30.8, 20.9, 20.8. IR (KBr):  $\nu$  ( $\text{cm}^{-1}$ ) 2955, 1724, 1517, 1274, 1261, 1163, 1025, 765, 750. HRMS (ESI,  $m/z$ ) calcd for  $\text{C}_{17}\text{H}_{20}\text{O}_6\text{Na}$   $[\text{M}+\text{Na}]^+$ : 321.1338, found: 321.1338.

**Methyl 6-(4-cyclohexylphenyl)-2-oxo-6-vinyltetrahydro-2H-pyran-3-carboxylate**

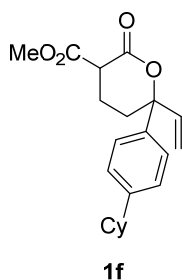

**1f** was obtained as light yellow oil, dr = 1:1.  $^1\text{H}$  NMR (500 MHz,  $\text{CDCl}_3$ )  $\delta$  = 7.35–7.28 (m, 4H), 7.24–7.16 (m, 4H), 6.11–5.96 (m, 2H), 5.38–5.22 (m, 4H), 3.77 (s, 3H), 3.72 (s, 3H), 3.62–3.55 (t,  $J$  = 7.5 Hz, 1H), 3.45–3.36 (t,  $J$  = 7.5 Hz, 1H), 2.58–2.43 (m, 2H), 2.40–2.26 (m, 4H), 2.23–1.99 (m, 4H), 1.91–1.79 (m, 8H), 1.79–1.67 (m, 2H), 1.47–1.31 (m, 8H), 1.31–1.19 (m, 2H).  $^{13}\text{C}$  NMR (125 MHz,  $\text{CDCl}_3$ )  $\delta$  = 169.7, 169.6, 167.1, 166.9, 148.0, 147.8, 140.6, 140.5, 139.2, 138.9, 127.2, 127.0, 125.2, 125.0, 115.3, 115.1, 87.6, 87.5, 52.8, 52.8, 47.0, 46.9, 44.1, 34.4, 31.1, 30.9, 26.9, 26.1, 20.9, 20.8. IR (KBr):  $\nu$  ( $\text{cm}^{-1}$ ) 2923, 2850, 1727, 1193, 1031, 929, 827, 764, 750. HRMS (ESI,  $m/z$ ) calcd for  $\text{C}_{21}\text{H}_{26}\text{O}_4\text{Na}$   $[\text{M}+\text{Na}]^+$ : 343.1909, found: 343.1911.

**Methyl 6-(4-(tert-butyl)phenyl)-2-oxo-6-vinyltetrahydro-2H-pyran-3-carboxylate**

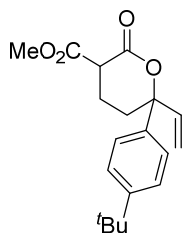

**1g**

**1g** was obtained as light yellow oil, dr = 1:1.  $^1\text{H}$  NMR (500 MHz,  $\text{CDCl}_3$ )  $\delta$  = 7.42–7.36 (m, 4H), 7.36–7.29 (m, 4H), 6.11–5.97 (m, 2H), 5.40–5.21 (m, 4H), 3.78 (s, 3H), 3.74 (s, 3H), 3.63–3.56 (t,  $J$  = 7.5 Hz, 1H), 3.44–3.37 (t,  $J$  = 7.5 Hz, 1H), 2.41–2.26 (m, 4H), 2.26–2.01 (m, 4H), 1.31 (s, 18H).  $^{13}\text{C}$  NMR (125 MHz,  $\text{CDCl}_3$ )  $\delta$  = 169.7, 169.6, 167.1, 166.9, 151.0, 150.9, 140.6, 140.5, 138.8, 138.6, 125.7, 125.5, 124.9, 124.8, 115.3, 115.1, 87.6, 87.4, 52.8, 52.8, 47.0, 46.9, 34.5, 31.3, 31.1, 30.9, 20.9, 20.8. IR (KBr):  $\nu$  ( $\text{cm}^{-1}$ ) 2959, 2870, 1727, 1274, 1261, 1158, 928, 764, 750. HRMS (ESI,  $m/z$ ) calcd for  $\text{C}_{19}\text{H}_{24}\text{O}_4\text{Na}$   $[\text{M}+\text{Na}]^+$ : 339.1573, found: 339.1570.

**Methyl 6-(2-fluorophenyl)-2-oxo-6-vinyltetrahydro-2H-pyran-3-carboxylate**

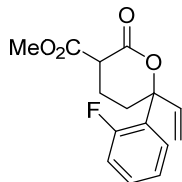

**1h**

**1h** was obtained as light yellow oil, dr = 1:1.  $^1\text{H}$  NMR (500 MHz,  $\text{CDCl}_3$ )  $\delta$  = 7.61–7.46 (m, 2H), 7.36–7.28 (m, 2H), 7.23–7.12 (m, 2H), 7.12–7.00 (m, 2H), 6.29–6.17 (m, 2H), 5.47–5.36 (m, 2H), 5.36–5.24 (m, 2H), 3.79 (s, 3H), 3.73 (s, 3H), 3.64–3.58 (t,  $J$  = 7.5 Hz, 1H), 3.52–3.46 (t,  $J$  = 8.0 Hz, 1H), 2.55–2.41 (m, 2H), 2.41–2.25 (m, 3H), 2.25–2.11 (m, 1H), 2.09–1.94 (m, 2H).  $^{13}\text{C}$  NMR (125 MHz,  $\text{CDCl}_3$ )  $\delta$  = 169.5, 169.4, 166.6, 166.5, 158.8 (d,  $J$  = 245.1 Hz), 158.5 (d,  $J$  = 245.0 Hz), 138.3 (d,  $J$  = 3.3 Hz), 138.1 (d,  $J$  = 3.2 Hz), 130.0 (d,  $J$  = 9.8 Hz), 129.9 (d,  $J$  = 9.4 Hz), 129.3 (d,  $J$  = 3.4 Hz), 129.2 (d,  $J$  = 3.4 Hz), 127.2 (d,  $J$  = 3.4 Hz), 126.9 (d,  $J$  = 3.4 Hz), 124.6 (d,  $J$  = 2.9 Hz), 124.6 (d,  $J$  = 3.3 Hz), 116.6, 116.6 (d,  $J$  = 23.6 Hz), 116.4 (d,  $J$  = 23.5 Hz), 116.0, 86.0 (d,  $J$  = 4.5 Hz), 86.0 (d,  $J$  = 5.5 Hz), 52.8, 47.4, 47.2, 30.6 (d,  $J$  = 5.6 Hz), 30.1 (d,  $J$  = 5.6 Hz), 21.0.  $^{19}\text{F}$  NMR (470 MHz,  $\text{CDCl}_3$ )  $\delta$  = –112.0, –112.2. IR (KBr):  $\nu$  ( $\text{cm}^{-1}$ ) 2991, 2954, 1728, 1276, 1261, 1159, 1030, 764, 750. HRMS (ESI,  $m/z$ ) calcd for  $\text{C}_{15}\text{H}_{15}\text{FO}_4\text{Na}$   $[\text{M}+\text{Na}]^+$ : 301.0852, found: 301.0848.

**Methyl 6-(4-fluorophenyl)-2-oxo-6-vinyltetrahydro-2H-pyran-3-carboxylate**

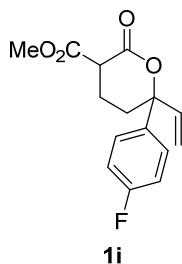

**1i** was obtained as light yellow oil, dr = 1:1.  $^1\text{H}$  NMR (500 MHz,  $\text{CDCl}_3$ )  $\delta$  = 7.47–7.34 (m, 4H), 7.13–6.97 (m, 4H), 6.12–5.91 (m, 2H), 5.42–5.22 (m, 4H), 3.79 (s, 3H), 3.75 (s, 3H), 3.64–3.59 (t,  $J$  = 7.0 Hz, 1H), 3.47–3.39 (t,  $J$  = 8.0 Hz, 1H), 2.39–2.02 (m, 8H).  $^{13}\text{C}$  NMR (125 MHz,  $\text{CDCl}_3$ )  $\delta$  = 169.5, 169.5, 166.7, 166.6, 162.3 (d,  $J$  = 245.9 Hz), 162.3 (d,  $J$  = 246.1 Hz), 140.2, 140.1, 137.7 (d,  $J$  = 17.6 Hz), 137.7 (d,  $J$  = 17.1 Hz), 127.2 (d,  $J$  = 7.9 Hz), 127.0 (d,  $J$  = 7.9 Hz), 115.9, 115.7 (d,  $J$  = 3.5 Hz), 115.6 (d,  $J$  = 4.4 Hz), 115.4, 87.2, 87.0, 52.9, 52.9, 47.0, 46.8, 31.1, 20.8, 20.8.  $^{19}\text{F}$  NMR (470 MHz,  $\text{CDCl}_3$ )  $\delta$  = –114.1, –114.4. IR (KBr):  $\nu$  ( $\text{cm}^{-1}$ ) 2993, 2957, 1729, 1509, 1275, 1260, 1228, 1162, 764, 750. HRMS (ESI,  $m/z$ ) calcd for  $\text{C}_{15}\text{H}_{15}\text{FO}_4\text{Na}$   $[\text{M}+\text{Na}]^+$ : 301.0852, found: 301.0849.

**Methyl 6-(3-chlorophenyl)-2-oxo-6-vinyltetrahydro-2H-pyran-3-carboxylate**

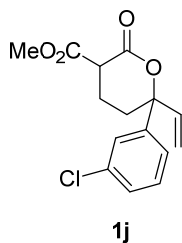

**1j** was obtained as light yellow oil, dr = 1:1.  $^1\text{H}$  NMR (500 MHz,  $\text{CDCl}_3$ )  $\delta$  = 7.45–7.37 (m, 2H), 7.37–7.19 (m, 6H), 6.11–5.90 (m, 2H), 5.44–5.24 (m, 4H), 3.79 (s, 3H), 3.75 (s, 3H), 3.64–3.59 (t,  $J$  = 7.0 Hz, 1H), 3.49–3.42 (t,  $J$  = 8.0 Hz, 1H), 2.39–2.28 (m, 3H), 2.28–2.01 (m, 5H).  $^{13}\text{C}$  NMR (125 MHz,  $\text{CDCl}_3$ )  $\delta$  = 169.4, 166.5, 166.4, 144.1, 144.0, 139.7, 134.8, 134.7, 130.1, 130.0, 128.2, 128.1, 125.6, 125.4, 123.4, 123.2, 116.3, 116.1, 86.9, 86.8, 53.0, 52.9, 47.0, 46.7, 31.2, 31.0, 20.8. IR (KBr):  $\nu$  ( $\text{cm}^{-1}$ ) 2954, 2920, 1725, 1275, 1260, 1159, 1118, 764, 750. HRMS (ESI,  $m/z$ ) calcd for  $\text{C}_{15}\text{H}_{15}\text{ClO}_4\text{Na}$   $[\text{M}+\text{Na}]^+$ : 317.0557, found: 317.0553.

**Methyl 6-(4-chlorophenyl)-2-oxo-6-vinyltetrahydro-2H-pyran-3-carboxylate**

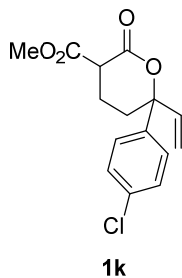

**1k** was obtained as light yellow oil, dr = 1:1.  $^1\text{H}$  NMR (500 MHz,  $\text{CDCl}_3$ )  $\delta$  = 7.41–7.31 (m, 8H), 6.11–5.91 (m, 2H), 5.43–5.24 (m, 4H), 3.79 (s, 3H), 3.74 (s, 3H), 3.64–3.56 (t,  $J$  = 7.0 Hz, 1H), 3.48–3.38 (t,  $J$  = 8.0 Hz, 1H), 2.37–1.98 (m, 8H).  $^{13}\text{C}$  NMR (125 MHz,  $\text{CDCl}_3$ )  $\delta$  = 169.5, 169.4, 166.6, 166.5, 140.5, 140.4, 139.9, 139.9, 134.0, 133.9, 128.9, 128.8, 126.7, 126.6, 116.1, 115.9, 87.1, 87.0, 52.9, 52.9, 47.0, 46.8, 31.1, 20.8, 20.8. IR (KBr):  $\nu$  ( $\text{cm}^{-1}$ ) 2993, 2954, 1728, 1492, 1275, 1261, 1012, 764, 750. HRMS (ESI,  $m/z$ ) calcd for  $\text{C}_{15}\text{H}_{15}\text{ClO}_4\text{Na}$   $[\text{M}+\text{Na}]^+$ : 317.0557, found: 317.0555.

**Methyl 6-(3,4-dichlorophenyl)-2-oxo-6-vinyltetrahydro-2H-pyran-3-carboxylate**

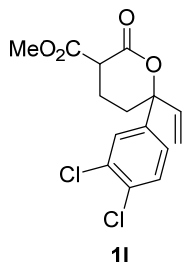

**1l** was obtained as light yellow oil, dr = 1:1.  $^1\text{H}$  NMR (500 MHz,  $\text{CDCl}_3$ )  $\delta$  = 7.55–7.48 (m, 2H), 7.48–7.41 (m, 2H), 7.30–7.21 (m, 2H), 6.06–5.93 (m, 2H), 5.43–5.28 (m, 4H), 3.80 (s, 3H), 3.76 (s, 3H), 3.64–3.60 (t,  $J$  = 7.0 Hz, 1H), 3.49–3.44 (t,  $J$  = 8.0 Hz, 1H), 2.40–2.25 (m, 3H), 2.25–2.01 (m, 5H).  $^{13}\text{C}$  NMR (125 MHz,  $\text{CDCl}_3$ )  $\delta$  = 169.3, 169.3, 166.2, 166.2, 142.3, 142.2, 139.3, 133.1, 132.9, 132.3, 132.2, 130.7, 130.6, 127.5, 127.3, 124.7, 124.5, 116.7, 116.4, 86.5, 86.3, 53.0, 52.9, 47.1, 46.6, 31.2, 30.9, 20.8, 20.8. IR (KBr):  $\nu$  ( $\text{cm}^{-1}$ ) 2991, 2960, 1729, 1275, 1261, 1028, 764, 750. HRMS (ESI,  $m/z$ ) calcd for  $\text{C}_{15}\text{H}_{14}\text{Cl}_2\text{O}_4\text{Na}$   $[\text{M}+\text{Na}]^+$ : 351.0167, found: 351.0164.

**Methyl 6-(4-bromophenyl)-2-oxo-6-vinyltetrahydro-2H-pyran-3-carboxylate**

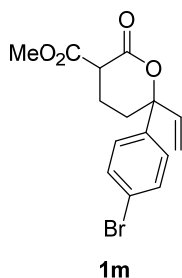

**1m** was obtained as light yellow oil, dr = 1:1.  $^1\text{H}$  NMR (500 MHz,  $\text{CDCl}_3$ )  $\delta$  = 7.55–7.43 (m, 4H), 7.36–7.20 (m, 4H), 6.10–5.93 (m, 2H), 5.44–5.21 (m, 4H), 3.78 (s, 3H), 3.74 (s, 3H), 3.64–3.58 (t,  $J$  = 7.0 Hz, 1H), 3.47–3.40 (t,  $J$  = 8.0 Hz, 1H), 2.38–2.00 (m, 8H).  $^{13}\text{C}$  NMR (125 MHz,  $\text{CDCl}_3$ )  $\delta$  = 169.4, 169.4, 166.6, 166.5, 141.1, 140.9, 139.9, 139.8, 131.9, 131.8, 127.1, 126.9, 122.2, 122.1, 116.2, 115.9, 87.1, 87.0, 52.9, 52.9, 47.0, 46.8, 31.0, 20.8, 20.8. IR (KBr):  $\nu$  ( $\text{cm}^{-1}$ ) 2988, 2953, 1728, 1275, 1261, 1161, 1009, 764, 750. HRMS (ESI,  $m/z$ ) calcd for  $\text{C}_{15}\text{H}_{15}\text{BrO}_4\text{Na}$   $[\text{M}+\text{Na}]^+$ : 361.0052, found: 361.0048.

**Methyl 6-(naphthalen-2-yl)-2-oxo-6-vinyltetrahydro-2H-pyran-3-carboxylate**

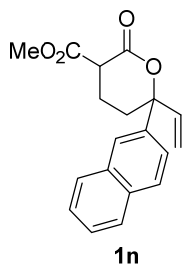

**1n** was obtained as light yellow oil, dr = 1:1.  $^1\text{H}$  NMR (500 MHz,  $\text{CDCl}_3$ )  $\delta$  = 7.93–7.73 (m, 8H), 7.53–7.39 (m, 6H), 6.18–6.01 (m, 2H), 5.43–5.33 (m, 2H), 5.33–5.22 (m, 2H), 3.76 (s, 3H), 3.68 (s, 3H), 3.64–3.59 (t,  $J$  = 7.5 Hz, 1H), 3.47–3.40 (t,  $J$  = 8.0 Hz, 1H), 2.48–2.21 (m, 5H), 2.19–1.96 (m, 3H).  $^{13}\text{C}$  NMR (125 MHz,  $\text{CDCl}_3$ )  $\delta$  = 169.6, 169.6, 167.1, 167.0, 140.3, 140.3, 139.1, 139.0, 133.1, 132.8, 132.7, 128.8, 128.6, 128.4, 128.3, 127.6, 127.6, 126.7, 126.6, 124.4, 124.0, 123.2, 123.1, 115.9, 115.7, 87.8, 87.6, 52.9, 47.0, 47.0, 31.1, 31.0, 20.9, 20.8. IR (KBr):  $\nu$  ( $\text{cm}^{-1}$ ) 2991, 2953, 1725, 1361, 1275, 1261, 1160, 764, 750. HRMS (ESI,  $m/z$ ) calcd for  $\text{C}_{19}\text{H}_{18}\text{O}_4\text{Na}$   $[\text{M}+\text{Na}]^+$ : 333.1103, found: 333.1100.

**Methyl 2-oxo-6-(thiophen-3-yl)-6-vinyltetrahydro-2H-pyran-3-carboxylate**

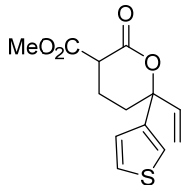

**1o**

**1o** was obtained as light yellow oil, dr = 1:1.  $^1\text{H}$  NMR (500 MHz,  $\text{CDCl}_3$ )  $\delta$  = 7.37–7.31 (m, 2H), 7.27–7.22 (m, 2H), 7.06–6.99 (m, 2H), 6.10–5.95 (m, 2H), 5.38–5.23 (m, 4H), 3.78 (s, 3H), 3.74 (s, 3H), 3.61–3.55 (t,  $J$  = 7.5 Hz, 1H), 3.49–3.43 (t,  $J$  = 8.0 Hz, 1H), 2.44–2.26 (m, 4H), 2.22–2.00 (m, 4H).  $^{13}\text{C}$  NMR (125 MHz,  $\text{CDCl}_3$ )  $\delta$  = 169.6, 169.6, 166.8, 166.7, 143.1, 139.9, 139.9, 126.9, 126.8, 125.4, 125.3, 121.9, 121.5, 115.8, 115.4, 86.2, 86.0, 52.9, 47.0, 46.9, 31.2, 31.1, 20.9, 20.9. IR (KBr):  $\nu$  ( $\text{cm}^{-1}$ ) 2991, 2953, 1725, 1275, 1261, 1195, 1162, 764, 750. HRMS (ESI,  $m/z$ ) calcd for  $\text{C}_{13}\text{H}_{14}\text{O}_4\text{SNa}$   $[\text{M}+\text{Na}]^+$ : 289.0511, found: 289.0508.

**Methyl 6-methyl-2-oxo-6-vinyltetrahydro-2H-pyran-3-carboxylate**

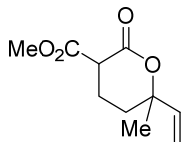

**1p**

**1p** was obtained as light yellow oil, dr = 1:1.  $^1\text{H}$  NMR (500 MHz,  $\text{CDCl}_3$ )  $\delta$  = 5.93–5.73 (m, 2H), 5.40–5.14 (m, 4H), 3.85–3.70 (m, 6H), 3.59–3.49 (m, 1H), 3.49–3.37 (m, 1H), 2.31–1.71 (m, 8H), 1.56–1.43 (m, 6H).  $^{13}\text{C}$  NMR (125 MHz,  $\text{CDCl}_3$ )  $\delta$  = 169.9, 169.7, 167.1, 167.0, 140.8, 140.4, 115.5, 114.7, 84.9, 84.6, 52.8, 52.7, 47.5, 46.1, 31.9, 30.5, 28.4, 28.1, 21.1, 20.7. IR (KBr):  $\nu$  ( $\text{cm}^{-1}$ ) 2991, 2959, 1724, 1457, 1275, 1261, 1112, 764, 750. HRMS (ESI,  $m/z$ ) calcd for  $\text{C}_{10}\text{H}_{14}\text{O}_4\text{Na}$   $[\text{M}+\text{Na}]^+$ : 221.0790, found: 221.0788.

**Methyl (14*R*,14*aS*,*E*)-11-phenyl-8-tosyl-8,9,12,13,14,14*a*-hexahydro-[1,2]diazonino[1,9-*c*]quinazoline-14-carboxylate**

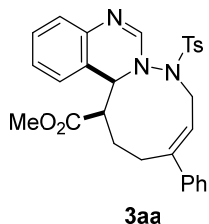

According to the general procedure A, **3aa** was obtained as white solid, 50.3 mg, 98% yield, dr > 20:1, m. p. 122–124 °C. <sup>1</sup>H NMR (500 MHz, CDCl<sub>3</sub>): δ = 7.76–7.70 (dd, *J*<sub>1</sub> = 6.5 Hz, *J*<sub>2</sub> = 1.5 Hz, 2H), 7.33–7.27 (m, 4H), 7.27–7.19 (m, 3H), 7.17–7.10 (m, 1H), 7.07–7.02 (m, 1H), 6.97–6.90 (m, 1H), 6.58–6.49 (dd, *J*<sub>1</sub> = 7.5 Hz, *J*<sub>2</sub> = 1.5 Hz, 1H), 6.46 (s, 1H), 6.24–6.16 (t, *J* = 8.5 Hz, 1H), 5.77–5.71 (d, *J* = 3.0 Hz, 1H), 4.54–4.44 (dd, *J*<sub>1</sub> = 15.0 Hz, *J*<sub>2</sub> = 8.5 Hz, 1H), 3.73–3.64 (dd, *J*<sub>1</sub> = 15.0 Hz, *J*<sub>2</sub> = 7.5 Hz, 1H), 3.62 (s, 3H), 3.28–3.20 (m, 1H), 2.62–2.46 (m, 2H), 2.37 (s, 3H), 1.89–1.74 (m, 1H), 1.60–1.47 (m, 1H). <sup>13</sup>C NMR (125 MHz, CDCl<sub>3</sub>): δ = 172.1, 146.9, 144.6, 144.5, 139.6, 138.8, 132.5, 129.5, 128.0, 127.7, 127.3, 127.2, 125.2, 125.1, 124.9, 121.2, 60.8, 51.0, 47.0, 44.2, 28.1, 20.7, 20.3. IR (KBr): ν (cm<sup>-1</sup>) 2950, 1733, 1618, 1596, 1262, 1163, 1087, 764, 750, 682. HRMS (ESI, *m/z*) calcd for C<sub>29</sub>H<sub>30</sub>N<sub>3</sub>O<sub>4</sub>S [M+H]<sup>+</sup>: 516.1957, found: 516.1954.

**Methyl (14*R*,14*aS*,*E*)-11-(*m*-tolyl)-8-tosyl-8,9,12,13,14,14*a*-hexahydro-[1,2]diazonino[1,9-*c*]quinazoline-14-carboxylate**

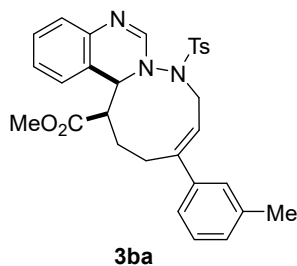

According to the general procedure A, **3ba** was obtained as white solid, 40.8 mg, 77% yield, dr > 20:1, m. p. 218–220 °C. <sup>1</sup>H NMR (500 MHz, CDCl<sub>3</sub>): δ = 7.79–7.67 (dd, *J*<sub>1</sub> = 6.5 Hz, *J*<sub>2</sub> = 1.5 Hz, 2H), 7.37–7.23 (d, *J* = 8.0 Hz, 2H), 7.16–7.00 (m, 6H), 6.98–6.89 (m, 1H), 6.57–6.48 (m, 1H), 6.45 (s, 1H), 6.23–6.17 (t, *J* = 8.0 Hz, 1H), 5.77–5.72 (d, *J* = 3.0 Hz, 1H), 4.54–4.44 (dd, *J*<sub>1</sub> = 15.0 Hz, *J*<sub>2</sub> = 8.5 Hz, 1H), 3.72–3.64 (dd, *J*<sub>1</sub> = 15.0 Hz, *J*<sub>2</sub> = 7.5 Hz, 1H), 3.63 (s, 3H), 3.29–3.21 (m, 1H), 2.63–2.45 (m, 2H), 2.38 (s, 3H), 2.27 (s, 3H), 1.87–1.72 (m, 1H), 1.58–1.46 (m, 1H). <sup>13</sup>C NMR (125 MHz, CDCl<sub>3</sub>): δ = 172.2, 147.1, 144.6, 144.5, 139.6, 138.8, 137.3, 132.5, 129.5, 128.0, 128.0, 127.6, 127.3, 125.8, 125.1, 124.9, 122.2, 121.3, 121.0, 60.8, 51.0, 47.0, 44.2, 28.0, 20.7, 20.5, 20.3. IR (KBr): ν (cm<sup>-1</sup>) 2949, 1735, 1619, 1597, 1275, 1262, 1165, 765, 750, 682. HRMS (ESI, *m/z*) calcd for C<sub>30</sub>H<sub>32</sub>N<sub>3</sub>O<sub>4</sub>S [M+H]<sup>+</sup>: 530.2113, found: 530.2114.

**Methyl (14*R*,14*aS*,*E*)-11-(*p*-tolyl)-8-tosyl-8,9,12,13,14,14*a*-hexahydro-[1,2]diazonino[1,9-*c*]quinazoline-14-carboxylate**

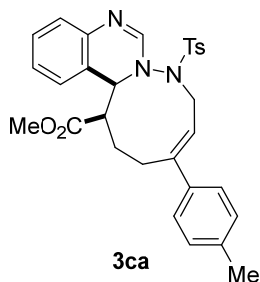

According to the general procedure A, **3ca** was obtained as white solid, 49.3 mg, 93% yield, dr > 20:1, m. p. 225–227 °C. <sup>1</sup>H NMR (500 MHz, CDCl<sub>3</sub>): δ = 7.78–7.67 (dd, *J*<sub>1</sub> = 6.5 Hz, *J*<sub>2</sub> = 2.0 Hz, 2H), 7.32–7.26 (d, *J* = 8.0 Hz, 2H), 7.22–7.12 (m, 3H), 7.10–7.01 (m, 3H), 6.98–6.88 (m, 1H), 6.57–6.48 (dd, *J*<sub>1</sub> = 8.0 Hz, *J*<sub>2</sub> = 1.5 Hz, 1H), 6.45 (s, 1H), 6.23–6.15 (t, *J* = 8.0 Hz, 1H), 5.75–5.69 (d, *J* = 3.5 Hz, 1H), 4.55–4.44 (dd, *J*<sub>1</sub> = 15.0 Hz, *J*<sub>2</sub> = 8.5 Hz, 1H), 3.72–3.63 (dd, *J*<sub>1</sub> = 15.0 Hz, *J*<sub>2</sub> = 7.5 Hz, 1H), 3.62 (s, 3H), 3.27–3.19 (m, 1H), 2.62–2.45 (m, 2H), 2.37 (s, 3H), 2.26 (s, 3H), 1.85–1.71 (m, 1H), 1.58–1.46 (m, 1H). <sup>13</sup>C NMR (125 MHz, CDCl<sub>3</sub>): δ = 172.1, 146.7, 144.6, 144.5, 139.6, 137.1, 135.7, 132.5, 129.5, 128.4, 127.9, 127.3, 125.1, 125.0, 124.8, 121.3, 120.4, 60.8, 51.0, 47.0, 44.3, 27.9, 20.7, 20.3, 20.1. IR (KBr): ν (cm<sup>-1</sup>) 2951, 1735, 1619, 1597, 1261, 1164, 1087, 822, 765, 750. HRMS (ESI, *m/z*) calcd for C<sub>30</sub>H<sub>32</sub>N<sub>3</sub>O<sub>4</sub>S [M+H]<sup>+</sup>: 530.2113, found: 530.2111.

**Methyl (14*R*,14*aS*,*E*)-11-(4-methoxyphenyl)-8-tosyl-8,9,12,13,14,14*a*-hexahydro-[1,2]diazonino[1,9-*c*]quinazoline-14-carboxylate**

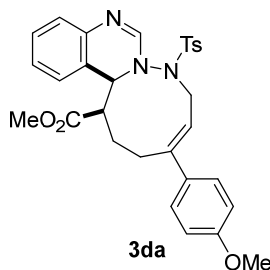

According to the general procedure A, **3da** was obtained as white solid, 46.8 mg, 86% yield, dr > 20:1, m. p. 236–238 °C. <sup>1</sup>H NMR (500 MHz, CDCl<sub>3</sub>): δ = 7.84–7.76 (dd, *J*<sub>1</sub> = 6.5 Hz, *J*<sub>2</sub> = 1.5 Hz, 2H), 7.40–7.29 (m, 4H), 7.24–7.18 (m, 1H), 7.16–7.09 (m, 1H), 7.06–6.97 (m, 1H), 6.90–6.81 (m, 2H), 6.64–6.56 (dd, *J*<sub>1</sub> = 8.0 Hz, *J*<sub>2</sub> = 1.5 Hz, 1H), 6.52 (s, 1H), 6.28–6.20 (t, *J* = 8.5 Hz, 1H), 5.84–5.75 (d, *J* = 3.5 Hz, 1H), 4.61–4.50 (dd, *J*<sub>1</sub> = 15.0 Hz, *J*<sub>2</sub> = 8.5 Hz, 1H), 3.80 (s, 3H), 3.78–3.71 (dd, *J*<sub>1</sub> = 15.0 Hz, *J*<sub>2</sub> = 7.5 Hz, 1H), 3.70 (s, 3H), 3.33–3.25 (m, 1H), 2.68–2.52 (m, 2H), 2.45 (s, 3H), 1.96–1.84 (m, 1H), 1.68–1.54 (m, 1H). <sup>13</sup>C NMR (125 MHz, CDCl<sub>3</sub>): δ = 173.2, 159.7, 147.1, 145.7, 145.5, 140.7, 133.5, 131.9, 130.5, 129.0, 128.4, 127.3, 126.2, 125.9, 122.3, 120.6, 114.1, 61.8, 55.3, 52.0, 48.1, 45.3, 28.8, 21.7, 21.4. IR (KBr): ν (cm<sup>-1</sup>) 2991, 1734, 1597, 1275, 1261, 1165, 764, 750. HRMS (ESI, *m/z*) calcd for C<sub>30</sub>H<sub>32</sub>N<sub>3</sub>O<sub>5</sub>S [M+H]<sup>+</sup>: 546.2062, found: 546.2063.

**Methyl (14*R*,14*aS*,*E*)-11-(3,4-dimethoxyphenyl)-8-tosyl-8,9,12,13,14,14*a*-hexahydro-[1,2]diazonino[1,9-*c*]quinazoline-14-carboxylate**

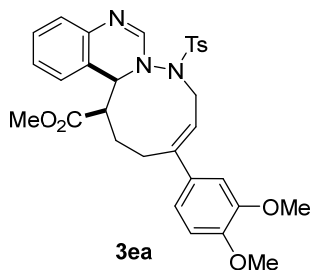

According to the general procedure A, **3ea** was obtained as colorless oil, 55.5 mg, 96% yield, dr > 20:1. <sup>1</sup>H NMR (500 MHz, CDCl<sub>3</sub>): δ = 7.86–7.73 (m, 2H), 7.42–7.33 (m, 2H), 7.25–7.18 (m, 1H), 7.15–7.08 (dd, *J*<sub>1</sub> = 8.0 Hz, *J*<sub>2</sub> = 1.5 Hz, 1H), 7.07–6.99 (m, 1H), 6.97–6.87 (m, 2H), 6.86–6.77 (d, *J* = 8.5 Hz, 1H), 6.65–6.58 (m, 1H), 6.51 (s, 1H), 6.31–6.23 (t, *J* = 8.0 Hz, 1H), 5.86–5.78 (d, *J* = 3.0 Hz, 1H), 4.66–4.52 (dd, *J*<sub>1</sub> = 15.0 Hz, *J*<sub>2</sub> = 8.5 Hz, 1H), 3.93–3.84 (d, *J* = 7.5 Hz, 6H), 3.81–3.72 (dd, *J*<sub>1</sub> = 15.0 Hz, *J*<sub>2</sub> = 7.5 Hz, 1H), 3.70 (s, 3H), 3.36–3.24 (m, 1H), 2.68–2.51 (m, 2H), 2.45 (s, 3H), 1.96–1.85 (m, 1H), 1.70–1.55 (m, 1H). <sup>13</sup>C NMR (125 MHz, CDCl<sub>3</sub>): δ = 173.2, 149.3, 149.0, 147.3, 145.6, 145.6, 140.6, 133.5, 132.3, 130.5, 129.0, 128.4, 126.2, 125.9, 125.9, 122.3, 120.9, 118.7, 111.2, 109.2, 61.9, 56.0, 55.9, 52.1, 48.1, 45.4, 29.0, 21.7, 21.4. IR (KBr): ν (cm<sup>-1</sup>) 2952, 1734, 1618, 1597, 1516, 1265, 1164, 765, 750. HRMS (ESI, *m/z*) calcd for C<sub>31</sub>H<sub>34</sub>N<sub>3</sub>O<sub>6</sub>S [M+H]<sup>+</sup>: 576.2168, found: 576.2168.

**Methyl (14*R*,14*aS*,*E*)-11-(4-cyclohexylphenyl)-8-tosyl-8,9,12,13,14,14*a*-hexahydro-[1,2]diazonino[1,9-*c*]quinazoline-14-carboxylate**

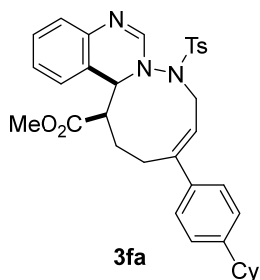

According to the general procedure A, **3fa** was obtained as colorless oil, 56.1 mg, 94% yield, dr > 20:1. <sup>1</sup>H NMR (500 MHz, CDCl<sub>3</sub>): δ = 7.85–7.74 (dd, *J*<sub>1</sub> = 6.5 Hz, *J*<sub>2</sub> = 1.5 Hz, 2H), 7.40–7.34 (d, *J* = 8.0 Hz, 2H), 7.33–7.27 (dd, *J*<sub>1</sub> = 6.5 Hz, *J*<sub>2</sub> = 2.0 Hz, 2H), 7.25–7.18 (m, 1H), 7.18–7.09 (m, 3H), 7.05–6.99 (m, 1H), 6.62–6.57 (m, 1H), 6.53 (s, 1H), 6.31–6.24 (t, *J* = 8.0 Hz, 1H), 5.83–5.77 (d, *J* = 3.0 Hz, 1H), 4.60–4.51 (dd, *J*<sub>1</sub> = 15.0 Hz, *J*<sub>2</sub> = 8.5 Hz, 1H), 3.79–3.72 (dd, *J*<sub>1</sub> = 15.0 Hz, *J*<sub>2</sub> = 7.5 Hz, 1H), 3.70 (s, 3H), 3.36–3.27 (dd, *J*<sub>1</sub> = 11.0 Hz, *J*<sub>2</sub> = 6.5 Hz, 1H), 2.69–2.41 (m, 6H), 1.95–1.80 (m, 5H), 1.78–1.70 (m, 1H), 1.66–1.54 (m, 1H), 1.48–1.32 (m, 4H), 1.30–1.20 (m, 1H). <sup>13</sup>C NMR (125 MHz, CDCl<sub>3</sub>): δ = 173.3, 148.3, 147.7, 145.7, 145.5, 140.7, 137.1, 133.6, 130.5, 129.0, 128.4, 127.2, 126.2, 126.0, 126.0, 125.9, 122.3, 121.5, 61.9, 52.0, 48.1, 45.4, 44.2, 34.4, 34.3, 28.9, 26.9, 26.2, 21.8, 21.4. IR (KBr): ν (cm<sup>-1</sup>) 2924, 1735, 1620, 1597, 1261, 1165, 765, 750, 682. HRMS (ESI, *m/z*) calcd for C<sub>35</sub>H<sub>40</sub>N<sub>3</sub>O<sub>4</sub>S [M+H]<sup>+</sup>: 598.2739, found: 598.2740.

**Methyl (14*R*,14*aS*,*E*)-11-(4-(*tert*-butyl)phenyl)-8-tosyl-8,9,12,13,14,14*a*-hexahydro-[1,2]diazonino[1,9-*c*]quinazoline-14-carboxylate**

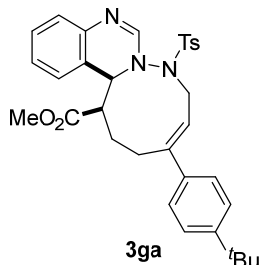

According to the general procedure A, **3ga** was obtained as white solid, 55.1 mg, 96% yield, dr > 20:1, m. p. 207–209 °C. <sup>1</sup>H NMR (500 MHz, CDCl<sub>3</sub>): δ = 7.85–7.77 (m, 2H), 7.40–7.28 (m, 6H), 7.24–7.19 (m, 1H), 7.16–7.10 (m, 1H), 7.06–6.99 (m, 1H), 6.62–6.56 (dd, *J*<sub>1</sub> = 7.5 Hz, *J*<sub>2</sub> = 1.0 Hz, 1H), 6.53 (s, 1H), 6.32–6.25 (t, *J* = 8.0 Hz, 1H), 5.83–5.76 (d, *J* = 3.0 Hz, 1H), 4.63–4.50 (dd, *J*<sub>1</sub> = 15.0 Hz, *J*<sub>2</sub> = 8.5 Hz, 1H), 3.80–3.72 (dd, *J*<sub>1</sub> = 15.0 Hz, *J*<sub>2</sub> = 7.5 Hz, 1H), 3.71 (s, 3H), 3.36–3.29 (m, 1H), 2.72–2.51 (m, 2H), 2.45 (s, 3H), 2.01–1.86 (m, 1H), 1.68–1.55 (m, 1H), 1.31 (s, 9H). <sup>13</sup>C NMR (125 MHz, CDCl<sub>3</sub>): δ = 173.3, 151.3, 147.6, 145.7, 145.5, 140.7, 136.7, 133.5, 130.5, 129.0, 128.4, 126.2, 125.9, 125.7, 125.7, 122.3, 121.5, 61.9, 52.1, 48.1, 45.3, 34.6, 31.3, 28.9, 21.7, 21.4. IR (KBr): ν (cm<sup>-1</sup>) 2961, 1737, 1620, 1597, 1359, 1263, 1165, 766, 683, 558. HRMS (ESI, *m/z*) calcd for C<sub>33</sub>H<sub>38</sub>N<sub>3</sub>O<sub>4</sub>S [M+H]<sup>+</sup>: 572.2583, found: 572.2583.

**Methyl (14*R*,14*aS*,*E*)-11-(2-fluorophenyl)-8-tosyl-8,9,12,13,14,14*a*-hexahydro-[1,2]diazonino[1,9-*c*]quinazoline-14-carboxylate**

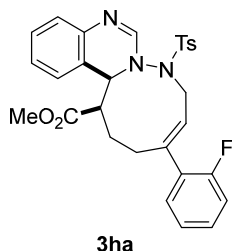

According to the general procedure A, **3ha** was obtained as white solid, 49.3 mg, 92% yield, dr > 20:1, m. p. 203–205 °C. <sup>1</sup>H NMR (500 MHz, CDCl<sub>3</sub>): δ = 7.85–7.78 (dd, *J*<sub>1</sub> = 6.5 Hz, *J*<sub>2</sub> = 1.5 Hz, 2H), 7.43–7.34 (d, *J* = 8.0 Hz, 2H), 7.27–7.09 (m, 5H), 7.07–6.98 (m, 2H), 6.66–6.57 (dd, *J*<sub>1</sub> = 8.0 Hz, *J*<sub>2</sub> = 1.5 Hz, 1H), 6.54 (s, 1H), 6.18–6.06 (t, *J* = 8.0 Hz, 1H), 5.93–5.85 (d, *J* = 3.0 Hz, 1H), 4.61–4.49 (dd, *J*<sub>1</sub> = 15.0 Hz, *J*<sub>2</sub> = 8.5 Hz, 1H), 3.82–3.69 (m, 4H), 3.51–3.38 (m, 1H), 2.66–2.50 (m, 2H), 2.45 (s, 3H), 1.91–1.74 (m, 1H), 1.66–1.46 (m, 1H). <sup>13</sup>C NMR (125 MHz, CDCl<sub>3</sub>): δ = 173.3, 159.7 (d, *J* = 245.1 Hz), 145.8, 145.6, 144.4, 140.5, 133.5, 130.5, 129.8 (d, *J* = 3.4 Hz), 129.5 (d, *J* = 8.6 Hz), 129.0, 128.9, 128.8, 128.4, 126.2, 126.0, 125.9, 124.3 (d, *J* = 3.6 Hz), 122.3, 116.0 (d, *J* = 22.4 Hz), 61.7, 52.2, 47.8, 45.1, 30.4, 21.7, 21.2. <sup>19</sup>F NMR (470 MHz, CDCl<sub>3</sub>): δ = -115.4. IR (KBr): ν (cm<sup>-1</sup>) 2951, 1733, 1619, 1597, 1487, 1213, 1164, 764, 737, 681. HRMS (ESI, *m/z*) calcd for C<sub>29</sub>H<sub>29</sub>FN<sub>3</sub>O<sub>4</sub>S [M+H]<sup>+</sup>: 534.1863, found: 534.1864.

**Methyl (14*R*,14*aS*,*E*)-11-(4-fluorophenyl)-8-tosyl-8,9,12,13,14,14*a*-hexahydro-[1,2]diazonino[1,9-*c*]quinazoline-14-carboxylate**

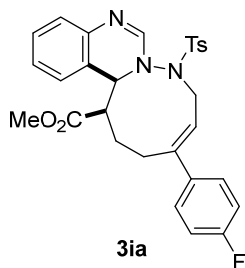

According to the general procedure A, **3ia** was obtained as white solid, 44.4 mg, 83% yield, dr > 20:1, m. p. 224–226 °C. <sup>1</sup>H NMR (500 MHz, CDCl<sub>3</sub>): δ = 7.87–7.75 (dd, *J*<sub>1</sub> = 6.5 Hz, *J*<sub>2</sub> = 2.0 Hz, 2H), 7.43–7.30 (m, 4H), 7.25–7.19 (m, 1H), 7.15–7.09 (dd, *J*<sub>1</sub> = 8.0 Hz, *J*<sub>2</sub> = 1.5 Hz, 1H), 7.06–6.98 (m, 3H), 6.62–6.56 (dd, *J*<sub>1</sub> = 8.0 Hz, *J*<sub>2</sub> = 1.5 Hz, 1H), 6.51 (s, 1H), 6.29–6.21 (t, *J* = 8.0 Hz, 1H), 5.87–5.80 (d, *J* = 3.0 Hz, 1H), 4.62–4.52 (dd, *J*<sub>1</sub> = 15.0 Hz, *J*<sub>2</sub> = 8.5 Hz, 1H), 3.78–3.68 (m, 4H), 3.33–3.25 (m, 1H), 2.65–2.57 (m, 2H), 2.45 (s, 3H), 1.92–1.81 (m, 1H), 1.66–1.55 (m, 1H). <sup>13</sup>C NMR (125 MHz, CDCl<sub>3</sub>): δ = 173.1, 162.8 (d, *J* = 246.1 Hz), 146.9, 145.6, 145.6, 140.6, 135.8 (d, *J* = 3.3 Hz), 133.5, 130.5, 129.0, 128.4, 127.8 (d, *J* = 7.9 Hz), 126.3, 125.9 (d, *J* = 10.5 Hz), 122.3 (d, *J* = 11.1 Hz), 115.7 (d, *J* = 21.3 Hz), 61.8, 52.1, 48.0, 45.2, 29.2, 21.7, 21.3. <sup>19</sup>F NMR (470 MHz, CDCl<sub>3</sub>): δ = –113.7. IR (KBr): ν (cm<sup>–1</sup>) 2989, 1734, 1618, 1597, 1508, 1275, 1261, 1165, 764, 750. HRMS (ESI, *m/z*) calcd for C<sub>29</sub>H<sub>29</sub>FN<sub>3</sub>O<sub>4</sub>S [M+H]<sup>+</sup>: 534.1863, found: 534.1866.

**Methyl (14*R*,14*aS*,*E*)-11-(3-chlorophenyl)-8-tosyl-8,9,12,13,14,14*a*-hexahydro-[1,2]diazonino[1,9-*c*]quinazoline-14-carboxylate**

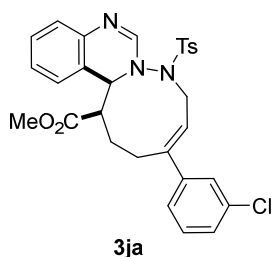

According to the general procedure A, **3ja** was obtained as colorless oil, 44.7 mg, 81% yield, dr > 20:1. <sup>1</sup>H NMR (500 MHz, CDCl<sub>3</sub>): δ = 7.87–7.76 (d, *J* = 8.0 Hz, 2H), 7.44–7.31 (m, 3H), 7.27–7.19 (m, 4H), 7.17–7.08 (d, *J* = 8.0 Hz, 1H), 7.07–6.98 (m, 1H), 6.66–6.58 (d, *J* = 7.5 Hz, 1H), 6.53 (s, 1H), 6.32–6.24 (t, *J* = 8.0 Hz, 1H), 5.88–5.79 (d, *J* = 3.0 Hz, 1H), 4.62–4.51 (dd, *J*<sub>1</sub> = 15.0 Hz, *J*<sub>2</sub> = 8.5 Hz, 1H), 3.78–3.67 (m, 4H), 3.31–3.22 (m, 1H), 2.64–2.53 (m, 2H), 2.46 (s, 3H), 1.92–1.77 (m, 1H), 1.71–1.56 (m, 1H). <sup>13</sup>C NMR (125 MHz, CDCl<sub>3</sub>): δ = 173.1, 146.7, 145.6, 145.6, 141.7, 140.5, 134.7, 133.4, 130.6, 130.0, 129.1, 128.4, 128.4, 126.3, 126.3, 126.0, 125.9, 124.4, 123.4, 122.2, 61.8, 52.2, 47.9, 45.1, 29.0, 21.8, 21.3. IR (KBr): ν (cm<sup>–1</sup>) 2950, 1733, 1619, 1596, 1355, 1164, 1087, 762, 682. HRMS (ESI, *m/z*) calcd for C<sub>29</sub>H<sub>29</sub>ClN<sub>3</sub>O<sub>4</sub>S [M+H]<sup>+</sup>: 550.1567, found: 550.1568.

**Methyl (14*R*,14*aS*,*E*)-11-(4-chlorophenyl)-8-tosyl-8,9,12,13,14,14*a*-hexahydro-[1,2]diazonino[1,9-*c*]quinazoline-14-carboxylate**

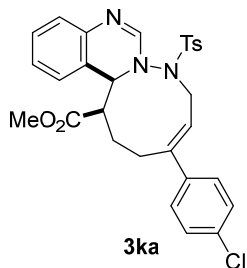

According to the general procedure A, **3ka** was obtained as white solid, 49.2 mg, 90% yield, dr > 20:1, m. p. 239–241 °C. <sup>1</sup>H NMR (500 MHz, CDCl<sub>3</sub>): δ = 7.76–7.70 (dd, *J*<sub>1</sub> = 6.5 Hz, *J*<sub>2</sub> = 1.5 Hz, 2H), 7.33–7.27 (d, *J* = 8.0 Hz, 2H), 7.26–7.20 (m, 4H), 7.18–7.11 (m, 1H), 7.09–7.02 (dd, *J*<sub>1</sub> = 8.0 Hz, *J*<sub>2</sub> = 1.5 Hz, 1H), 6.98–6.91 (m, 1H), 6.55–6.50 (d, *J* = 7.5 Hz, 1H), 6.44 (s, 1H), 6.24–6.17 (t, *J* = 8.0 Hz, 1H), 5.78–5.71 (d, *J* = 3.5 Hz, 1H), 4.55–4.44 (dd, *J*<sub>1</sub> = 15.0 Hz, *J*<sub>2</sub> = 8.5 Hz, 1H), 3.71–3.59 (m, 4H), 3.23–3.15 (m, 1H), 2.57–2.48 (m, 2H), 2.38 (s, 3H), 1.80–1.70 (m, 1H), 1.59–1.46 (m, 1H). <sup>13</sup>C NMR (125 MHz, CDCl<sub>3</sub>): δ = 172.0, 145.7, 144.6, 144.5, 139.5, 137.1, 133.2, 132.4, 129.5, 128.0, 127.9, 127.3, 126.4, 125.2, 124.9, 124.9, 124.8, 121.7, 121.2, 60.8, 51.1, 46.9, 44.1, 28.0, 20.7, 20.2. IR (KBr): ν (cm<sup>-1</sup>) 2951, 1733, 1618, 1597, 1261, 1164, 1087, 830, 765, 750. HRMS (ESI, *m/z*) calcd for C<sub>29</sub>H<sub>29</sub>ClN<sub>3</sub>O<sub>4</sub>S [M+H]<sup>+</sup>: 550.1567, found: 550.1568.

**Methyl (14*R*,14*aS*,*E*)-11-(3,4-dichlorophenyl)-8-tosyl-8,9,12,13,14,14*a*-hexahydro-[1,2]diazonino[1,9-*c*]quinazoline-14-carboxylate**

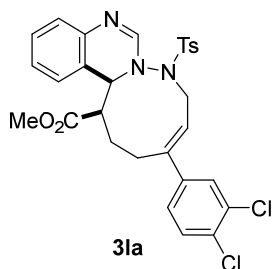

According to the general procedure A, **3la** was obtained as white solid, 53.3 mg, 91% yield, dr > 20:1, m. p. 209–211 °C. <sup>1</sup>H NMR (500 MHz, CDCl<sub>3</sub>): δ = 7.85–7.77 (d, *J* = 8.0 Hz, 2H), 7.48–7.44 (d, *J* = 2.0 Hz, 1H), 7.43–7.33 (t, *J* = 8.0 Hz, 3H), 7.26–7.17 (m, 2H), 7.15–7.09 (dd, *J*<sub>1</sub> = 8.0 Hz, *J*<sub>2</sub> = 1.5 Hz, 1H), 7.06–6.98 (m, 1H), 6.65–6.57 (d, *J* = 7.5 Hz, 1H), 6.52 (s, 1H), 6.34–6.25 (t, *J* = 8.0 Hz, 1H), 5.87–5.80 (d, *J* = 3.0 Hz, 1H), 4.63–4.52 (dd, *J*<sub>1</sub> = 15.0 Hz, *J*<sub>2</sub> = 8.5 Hz, 1H), 3.79–3.67 (m, 4H), 3.29–3.15 (m, 1H), 2.62–2.53 (m, 2H), 2.46 (s, 3H), 1.90–1.77 (m, 1H), 1.69–1.56 (m, 1H). <sup>13</sup>C NMR (125 MHz, CDCl<sub>3</sub>): δ = 173.0, 145.7, 145.7, 145.5, 140.5, 139.7, 133.3, 133.0, 132.4, 130.7, 130.6, 129.1, 128.4, 128.1, 126.3, 126.0, 126.0, 125.9, 125.5, 123.8, 122.1, 61.7, 52.2, 47.9, 45.0, 28.9, 21.8, 21.3. IR (KBr): ν (cm<sup>-1</sup>) 2952, 1733, 1619, 1597, 1275, 1261, 1164, 1087, 765, 750. HRMS (ESI, *m/z*) calcd for C<sub>29</sub>H<sub>28</sub>Cl<sub>2</sub>N<sub>3</sub>O<sub>4</sub>S [M+H]<sup>+</sup>: 584.1177, found: 584.1176.

**Methyl (14*R*,14*aS*,*E*)-11-(4-bromophenyl)-8-tosyl-8,9,12,13,14,14*a*-hexahydro-[1,2]diazonino[1,9-*c*]quinazoline-14-carboxylate**

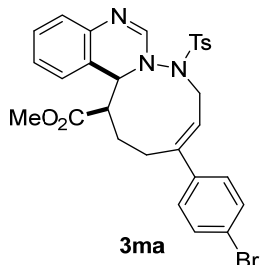

According to the general procedure A, **3ma** was obtained as white solid, 54.6 mg, 92% yield, dr > 20:1, m. p. 234–236 °C. <sup>1</sup>H NMR (500 MHz, CDCl<sub>3</sub>): δ = 7.87–7.76 (dd, *J*<sub>1</sub> = 6.5 Hz, *J*<sub>2</sub> = 2.0 Hz, 2H), 7.52–7.42 (m, 2H), 7.42–7.33 (d, *J* = 8.0 Hz, 2H), 7.29–7.19 (m, 3H), 7.18–7.09 (dd, *J*<sub>1</sub> = 8.0 Hz, *J*<sub>2</sub> = 1.5 Hz, 1H), 7.06–6.98 (m, 1H), 6.65–6.55 (dd, *J*<sub>1</sub> = 8.0 Hz, *J*<sub>2</sub> = 1.5 Hz, 1H), 6.51 (s, 1H), 6.33–6.24 (t, *J* = 8.0 Hz, 1H), 5.87–5.75 (d, *J* = 3.0 Hz, 1H), 4.62–4.50 (dd, *J*<sub>1</sub> = 15.0 Hz, *J*<sub>2</sub> = 8.5 Hz, 1H), 3.78–3.65 (m, 4H), 3.31–3.21 (m, 1H), 2.65–2.54 (m, 2H), 2.45 (s, 3H), 1.92–1.78 (m, 1H), 1.69–1.54 (m, 1H). <sup>13</sup>C NMR (125 MHz, CDCl<sub>3</sub>): δ = 173.1, 146.8, 145.6, 145.5, 140.6, 138.7, 133.4, 131.9, 130.6, 129.1, 128.4, 127.8, 126.3, 126.0, 125.9, 122.8, 122.4, 122.2, 61.8, 52.2, 47.9, 45.1, 29.0, 21.8, 21.3. IR (KBr): ν (cm<sup>-1</sup>) 2951, 1732, 1618, 1597, 1275, 1261, 1163, 1087, 765, 750, 682. HRMS (ESI, *m/z*) calcd for C<sub>29</sub>H<sub>29</sub>BrN<sub>3</sub>O<sub>4</sub>S [M+H]<sup>+</sup>: 594.1062, found: 594.1065.

**Methyl (14*R*,14*aS*,*E*)-11-(naphthalen-2-yl)-8-tosyl-8,9,12,13,14,14*a*-hexahydro-[1,2]diazonino[1,9-*c*]quinazoline-14-carboxylate**

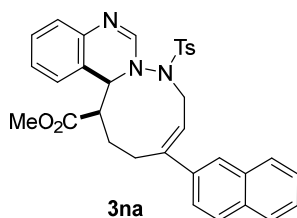

According to the general procedure A, **3na** was obtained as white solid, 54.1 mg, 96% yield, dr > 20:1, m. p. 207–209 °C. <sup>1</sup>H NMR (500 MHz, CDCl<sub>3</sub>): δ = 7.80–7.67 (m, 6H), 7.49–7.42 (dd, *J*<sub>1</sub> = 8.5 Hz, *J*<sub>2</sub> = 2.0 Hz, 1H), 7.42–7.33 (m, 2H), 7.32–7.25 (d, *J* = 8.0 Hz, 2H), 7.16–7.11 (m, 1H), 7.09–7.03 (dd, *J*<sub>1</sub> = 8.0 Hz, *J*<sub>2</sub> = 1.5 Hz, 1H), 6.97–6.90 (m, 1H), 6.55–6.50 (dd, *J*<sub>1</sub> = 7.5 Hz, *J*<sub>2</sub> = 1.5 Hz, 1H), 6.48 (s, 1H), 6.41–6.33 (t, *J* = 8.0 Hz, 1H), 5.79–5.72 (d, *J* = 3.5 Hz, 1H), 4.59–4.48 (dd, *J*<sub>1</sub> = 15.0 Hz, *J*<sub>2</sub> = 8.5 Hz, 1H), 3.77–3.65 (dd, *J*<sub>1</sub> = 15.0 Hz, *J*<sub>2</sub> = 7.5 Hz, 1H), 3.57 (s, 3H), 3.34–3.26 (m, 1H), 2.78–2.67 (m, 1H), 2.64–2.53 (m, 1H), 2.37 (s, 3H), 1.92–1.79 (m, 1H), 1.63–1.50 (m, 1H). <sup>13</sup>C NMR (125 MHz, CDCl<sub>3</sub>): δ = 173.1, 147.7, 145.7, 145.6, 140.6, 136.9, 133.5, 133.4, 133.2, 130.6, 129.0, 128.4, 128.4, 128.3, 127.6, 126.4, 126.3, 126.2, 125.9, 125.3, 124.1, 122.7, 122.3, 61.9, 52.1, 48.1, 45.3, 28.9, 21.8, 21.5. IR (KBr): ν (cm<sup>-1</sup>) 2989, 1734, 1619, 1597, 1275, 1165, 765, 750, 685. HRMS (ESI, *m/z*) calcd for C<sub>33</sub>H<sub>32</sub>N<sub>3</sub>O<sub>4</sub>S [M+H]<sup>+</sup>: 566.2113, found: 566.2113.

**Methyl (14*R*,14*aS*,*E*)-11-(thiophen-3-yl)-8-tosyl-8,9,12,13,14,14*a*-hexahydro-[1,2]diazonino[1,9-*c*]quinazoline-14-carboxylate**

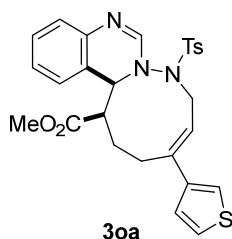

According to the general procedure A, **3oa** was obtained as colorless oil, 50.5 mg, 97% yield, dr > 20:1. <sup>1</sup>H NMR (500 MHz, CDCl<sub>3</sub>): δ = 7.83–7.76 (dd, *J*<sub>1</sub> = 6.5 Hz, *J*<sub>2</sub> = 1.5 Hz, 2H), 7.41–7.34 (d, *J* = 8.0 Hz, 2H), 7.30–7.20 (m, 4H), 7.17–7.10 (dd, *J*<sub>1</sub> = 7.5 Hz, *J*<sub>2</sub> = 1.5 Hz, 1H), 7.07–6.98 (m, 1H), 6.63–6.57 (dd, *J*<sub>1</sub> = 8.5 Hz, *J*<sub>2</sub> = 1.0 Hz, 1H), 6.53 (s, 1H), 6.48–6.39 (t, *J* = 8.0 Hz, 1H), 5.82–5.74 (d, *J* = 3.0 Hz, 1H), 4.62–4.51 (dd, *J*<sub>1</sub> = 15.0 Hz, *J*<sub>2</sub> = 8.5 Hz, 1H), 3.75–3.65 (m, 4H), 3.30–3.21 (m, 1H), 2.65–2.50 (m, 2H), 2.45 (s, 3H), 2.14–2.02 (m, 1H), 1.75–1.61 (m, 1H). <sup>13</sup>C NMR (125 MHz, CDCl<sub>3</sub>): δ = 173.2, 145.6, 145.6, 141.9, 140.7, 140.6, 133.5, 130.5, 129.0, 128.4, 126.3, 126.2, 125.9, 125.9, 125.3, 122.3, 121.9, 120.7, 61.8, 52.1, 48.0, 45.4, 28.9, 21.8, 21.7. IR (KBr): ν (cm<sup>-1</sup>) 2950, 1734, 1618, 1597, 1275, 1260, 1165, 765, 750, 685. HRMS (ESI, *m/z*) calcd for C<sub>27</sub>H<sub>28</sub>N<sub>3</sub>O<sub>4</sub>S<sub>2</sub> [M+H]<sup>+</sup>: 522.1521, found: 522.1522.

**Methyl (14*R*,14*aS*,*Z*)-11-methyl-8-tosyl-8,9,12,13,14,14*a*-hexahydro-[1,2]diazonino[1,9-*c*]quinazoline-14-carboxylate**

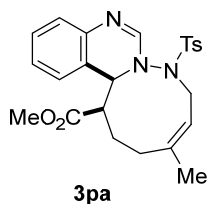

According to the general procedure A, **3pa** was obtained as colorless oil, 36.8 mg, 81% yield, dr > 20:1. <sup>1</sup>H NMR (500 MHz, CDCl<sub>3</sub>): δ = 7.74–7.66 (dd, *J*<sub>1</sub> = 6.5 Hz, *J*<sub>2</sub> = 1.5 Hz, 2H), 7.32–7.24 (d, *J* = 8.0 Hz, 2H), 7.17–7.09 (m, 1H), 7.06–7.00 (dd, *J*<sub>1</sub> = 7.5 Hz, *J*<sub>2</sub> = 1.5 Hz, 1H), 6.99–6.92 (m, 1H), 6.60–6.52 (d, *J* = 7.5 Hz, 1H), 6.39 (s, 1H), 5.79–5.70 (m, 2H), 4.31–4.21 (dd, *J*<sub>1</sub> = 15.0 Hz, *J*<sub>2</sub> = 8.0 Hz, 1H), 3.72 (s, 3H), 3.53–3.43 (dd, *J*<sub>1</sub> = 15.0 Hz, *J*<sub>2</sub> = 7.5 Hz, 1H), 3.20–3.12 (dd, *J*<sub>1</sub> = 10.5 Hz, *J*<sub>2</sub> = 3.0 Hz, 1H), 2.37 (s, 3H), 2.32–2.21 (m, 1H), 2.07–1.94 (m, 1H), 1.92–1.83 (m, 1H), 1.67 (s, 3H), 1.55–1.41 (m, 1H). <sup>13</sup>C NMR (125 MHz, CDCl<sub>3</sub>): δ = 172.5, 144.8, 144.4, 144.3, 139.6, 132.6, 129.4, 127.9, 127.3, 125.1, 124.8, 124.8, 121.4, 119.9, 60.6, 51.1, 46.8, 44.3, 30.0, 21.4, 20.7, 19.7. IR (KBr): ν (cm<sup>-1</sup>) 2951, 1734, 1618, 1597, 1275, 1261, 1164, 765, 750, 683. HRMS (ESI, *m/z*) calcd for C<sub>24</sub>H<sub>28</sub>N<sub>3</sub>O<sub>4</sub>S [M+H]<sup>+</sup>: 454.1800, found: 454.1799.

**Methyl (14*R*,14*aS*,*E*)-8-(mesitylsulfonyl)-11-phenyl-8,9,12,13,14,14*a*-hexahydro-[1,2]diazonino[1,9-*c*]quinazoline-14-carboxylate**

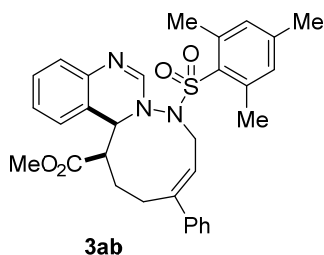

According to the general procedure A, **3ab** was obtained as white solid, 49.7 mg, 91% yield, dr > 20:1, m. p. 235–237 °C. <sup>1</sup>H NMR (500 MHz, CDCl<sub>3</sub>): δ = 7.51 (s, 1H), 7.31–7.20 (m, 5H), 7.14–7.06 (m, 2H), 6.90–6.79 (m, 3H), 6.26–6.18 (t, *J* = 8.5 Hz, 1H), 6.11–6.02 (dd, *J*<sub>1</sub> = 8.0 Hz, *J*<sub>2</sub> = 1.0 Hz, 1H), 4.83–4.70 (dd, *J*<sub>1</sub> = 15.0 Hz, *J*<sub>2</sub> = 8.5 Hz, 1H), 4.33–4.23 (d, *J* = 3.5 Hz, 1H), 3.93–3.78 (m, 1H), 3.46 (s, 3H), 2.96–2.86 (m, 1H), 2.71–2.56 (m, 2H), 2.53 (s, 6H), 2.23 (s, 3H), 1.78–1.66 (m, 1H), 1.52–1.38 (m, 1H). <sup>13</sup>C NMR (125 MHz, CDCl<sub>3</sub>): δ = 171.6, 147.4, 146.4, 143.2, 140.8, 139.5, 138.9, 131.2, 129.2, 128.0, 127.7, 127.3, 125.0, 124.8, 124.8, 124.2, 121.2, 120.5, 58.8, 50.7, 45.4, 44.1, 28.1, 21.8, 20.1, 19.9. IR (KBr): ν (cm<sup>-1</sup>) 2948, 1739, 1618, 1597, 1330, 1260, 1158, 764, 679. HRMS (ESI, *m/z*) calcd for C<sub>31</sub>H<sub>34</sub>N<sub>3</sub>O<sub>4</sub>S [M+H]<sup>+</sup>: 544.2270, found: 544.2270.

**Methyl (14*R*,14*aS*,*E*)-11-phenyl-8-(phenylsulfonyl)-8,9,12,13,14,14*a*-hexahydro-[1,2]diazonino[1,9-*c*]quinazoline-14-carboxylate**

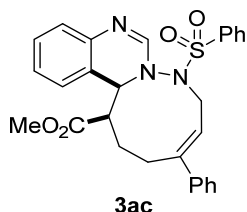

According to the general procedure A, **3ac** was obtained as white solid, 41.3 mg, 82% yield, dr > 20:1, m. p. 256–258 °C. <sup>1</sup>H NMR (500 MHz, CDCl<sub>3</sub>): δ = 7.90–7.84 (m, 2H), 7.65–7.57 (m, 1H), 7.56–7.48 (m, 2H), 7.32–7.20 (m, 5H), 7.18–7.12 (m, 1H), 7.09–7.02 (dd, *J*<sub>1</sub> = 8.0 Hz, *J*<sub>2</sub> = 1.5 Hz, 1H), 6.99–6.91 (m, 1H), 6.55–6.49 (dd, *J*<sub>1</sub> = 8.0 Hz, *J*<sub>2</sub> = 1.5 Hz, 1H), 6.48 (s, 1H), 6.26–6.16 (t, *J* = 8.0 Hz, 1H), 5.73–5.69 (d, *J* = 3.5 Hz, 1H), 4.59–4.44 (dd, *J*<sub>1</sub> = 15.0 Hz, *J*<sub>2</sub> = 8.5 Hz, 1H), 3.75–3.66 (dd, *J*<sub>1</sub> = 15.0 Hz, *J*<sub>2</sub> = 7.5 Hz, 1H), 3.62 (s, 3H), 3.27–3.20 (m, 1H), 2.63–2.45 (m, 2H), 1.88–1.74 (m, 1H), 1.59–1.48 (m, 1H). <sup>13</sup>C NMR (125 MHz, CDCl<sub>3</sub>): δ = 172.1, 147.1, 144.6, 139.5, 138.8, 135.6, 133.3, 128.9, 128.0, 127.7, 127.4, 127.3, 125.2, 125.1, 124.9, 124.9, 121.2, 121.1, 60.8, 51.1, 47.0, 44.3, 28.1, 20.3. IR (KBr): ν (cm<sup>-1</sup>) 3005, 1733, 1617, 1275, 1261, 1168, 1087, 764, 750. HRMS (ESI, *m/z*) calcd for C<sub>28</sub>H<sub>28</sub>N<sub>3</sub>O<sub>4</sub>S [M+H]<sup>+</sup>: 502.1800, found: 502.1802.

**Methyl (14*R*,14*aS*,*E*)-2-chloro-11-phenyl-8-tosyl-8,9,12,13,14,14*a*-hexahydro-[1,2]diazonino[1,9-*c*]quinazoline-14-carboxylate**

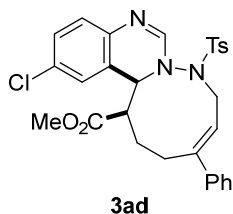

According to the general procedure B, **3ad** was obtained as colorless oil, 43.3 mg, 79% yield, dr > 20:1.  $^1\text{H}$  NMR (500 MHz,  $\text{CDCl}_3$ ):  $\delta$  = 7.83–7.75 (dd,  $J_1$  = 6.5 Hz,  $J_2$  = 2.0 Hz, 2H), 7.43–7.28 (m, 7H), 7.22–7.14 (dd,  $J_1$  = 8.0 Hz,  $J_2$  = 2.0 Hz, 1H), 7.09–7.03 (d,  $J$  = 8.5 Hz, 1H), 6.63–6.58 (d,  $J$  = 2.5 Hz, 1H), 6.56 (s, 1H), 6.33–6.24 (t,  $J$  = 8.0 Hz, 1H), 5.71–5.64 (d,  $J$  = 3.5 Hz, 1H), 4.64–4.51 (dd,  $J_1$  = 15.0 Hz,  $J_2$  = 8.5 Hz, 1H), 3.82–3.71 (dd,  $J_1$  = 15.0 Hz,  $J_2$  = 7.5 Hz, 1H), 3.70 (s, 3H), 3.36–3.23 (m, 1H), 2.76–2.65 (m, 1H), 2.62–2.53 (m, 1H), 2.46 (s, 3H), 1.96–1.83 (m, 1H), 1.67–1.55 (m, 1H).  $^{13}\text{C}$  NMR (125 MHz,  $\text{CDCl}_3$ ):  $\delta$  = 172.6, 147.9, 145.8, 145.7, 139.7, 139.5, 133.3, 131.2, 130.5, 129.1, 128.8, 128.4, 128.4, 127.1, 126.1, 123.8, 122.2, 61.5, 52.1, 47.7, 45.6, 29.1, 21.8, 21.3. IR (KBr):  $\nu$  ( $\text{cm}^{-1}$ ) 2989, 1734, 1594, 1481, 1275, 1261, 1165, 764, 750. HRMS (ESI,  $m/z$ ) calcd for  $\text{C}_{29}\text{H}_{29}\text{ClN}_3\text{O}_4\text{S}$   $[\text{M}+\text{H}]^+$ : 550.1567, found: 550.1569.

**Methyl (14*R*,14*aS*,*E*)-2,3-dimethoxy-11-phenyl-8-tosyl-8,9,12,13,14,14*a*-hexahydro-[1,2]diazonino[1,9-*c*]quinazoline-14-carboxylate**

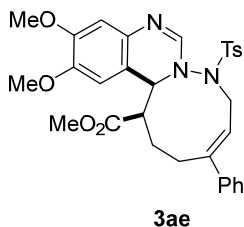

According to the general procedure A, **3ae** was obtained as white solid, 49.0mg, 85% yield, dr > 20:1, m. p. 224–226 °C.  $^1\text{H}$  NMR (500 MHz,  $\text{CDCl}_3$ ):  $\delta$  = 7.85–7.77 (d,  $J$  = 8.0 Hz, 2H), 7.41–7.36 (m, 4H), 7.36–7.28 (m, 3H), 6.70 (s, 1H), 6.45 (s, 1H), 6.34–6.24 (t,  $J$  = 8.0 Hz, 1H), 6.16 (s, 1H), 5.84–5.76 (d,  $J$  = 3.5 Hz, 1H), 4.61–4.49 (dd,  $J_1$  = 15.0 Hz,  $J_2$  = 8.5 Hz, 1H), 3.86 (s, 3H), 3.79–3.72 (m, 4H), 3.70 (s, 3H), 3.33–3.25 (dd,  $J_1$  = 11.0 Hz,  $J_2$  = 3.0 Hz, 1H), 2.71–2.53 (m, 2H), 2.46 (s, 3H), 1.96–1.80 (m, 1H), 1.67–1.57 (m, 1H).  $^{13}\text{C}$  NMR (125 MHz,  $\text{CDCl}_3$ ):  $\delta$  = 173.6, 149.0, 147.9, 147.0, 145.5, 144.3, 139.8, 134.6, 133.6, 130.5, 128.7, 128.4, 128.3, 126.2, 122.3, 113.6, 109.1, 108.5, 61.8, 55.9, 52.0, 47.9, 45.3, 29.1, 21.7, 21.3. IR (KBr):  $\nu$  ( $\text{cm}^{-1}$ ) 2952, 1733, 1605, 1510, 1275, 1261, 1164, 764, 750. HRMS (ESI,  $m/z$ ) calcd for  $\text{C}_{31}\text{H}_{34}\text{N}_3\text{O}_6\text{S}$   $[\text{M}+\text{H}]^+$ : 576.2168, found: 576.2170.

**((6*S*,7*R*,14*aR*,*E*)-11-phenyl-8-tosyl-8,9,12,13,14,14*a*-hexahydro-6,14-(epoxymethano)[1,2]diazonino[1,9-*c*]quinazolin-5(6*H*)-yl)methanone**

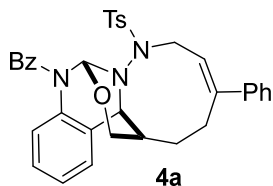

**4a** was obtained as white solid, 39.2mg, 66% yield, dr > 20:1, m. p. 109–111 °C. <sup>1</sup>H NMR (500 MHz, CDCl<sub>3</sub>): δ = 7.90–7.82 (d, *J* = 8.5 Hz, 1H), 7.56–7.46 (m, 3H), 7.45–7.39 (m, 2H), 7.39–7.28 (m, 7H), 7.24–7.17 (m, 1H), 7.11–7.04 (d, *J* = 8.0 Hz, 2H), 6.96–6.90 (m, 1H), 6.59–6.54 (dd, *J*<sub>1</sub> = 7.5 Hz, *J*<sub>2</sub> = 1.5 Hz, 1H), 6.14–6.09 (d, *J* = 1.5 Hz, 1H), 6.09–6.01 (dd, *J*<sub>1</sub> = 10.5 Hz, *J*<sub>2</sub> = 7.0 Hz, 1H), 4.65–4.53 (dd, *J*<sub>1</sub> = 14.5 Hz, *J*<sub>2</sub> = 7.0 Hz, 1H), 4.29–4.17 (dd, *J*<sub>1</sub> = 15.0 Hz, *J*<sub>2</sub> = 10.0 Hz, 1H), 4.14 (s, 1H), 4.05–3.94 (dd, *J*<sub>1</sub> = 12.5 Hz, *J*<sub>2</sub> = 5.5 Hz, 1H), 3.71–3.60 (dd, *J*<sub>1</sub> = 12.0 Hz, *J*<sub>2</sub> = 2.5 Hz, 1H), 3.41–3.28 (dd, *J*<sub>1</sub> = 14.5 Hz, *J*<sub>2</sub> = 9.0 Hz, 1H), 2.74–2.60 (dd, *J*<sub>1</sub> = 14.5 Hz, *J*<sub>2</sub> = 10.0 Hz, 1H), 2.40 (s, 3H), 2.02–1.90 (m, 1H), 1.78–1.63 (m, 2H). <sup>13</sup>C NMR (125 MHz, CDCl<sub>3</sub>): δ = 171.3, 146.2, 143.8, 141.7, 136.4, 136.3, 135.9, 131.2, 130.9, 129.3, 128.6, 128.6, 128.4, 128.1, 127.8, 127.0, 126.8, 125.1, 123.2, 122.0, 121.1, 93.9, 62.3, 58.2, 48.3, 38.8, 30.4, 25.0, 21.6. IR (KBr): ν (cm<sup>-1</sup>) 2928, 1663, 1489, 1330, 1159, 1090, 1033, 699, 662. HRMS (ESI, *m/z*) calcd for C<sub>35</sub>H<sub>34</sub>N<sub>3</sub>O<sub>4</sub>S [M+H]<sup>+</sup>: 592.2270, found: 592.2270.

**((6*S*,7*R*,14*aR*,*E*)-11-(4-bromophenyl)-8-tosyl-8,9,12,13,14,14*a*-hexahydro-6,14-(epoxymethano)[1,2]diazonino[1,9-*c*]quinazolin-5(6*H*)-yl)(phenyl)methanone**

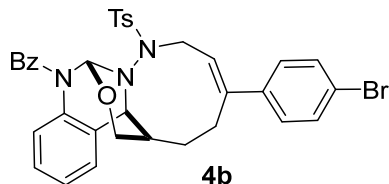

**4b** was obtained as white solid, 44.6 mg, 67% yield, dr > 20:1, m. p. 220–222 °C. <sup>1</sup>H NMR (500 MHz, CDCl<sub>3</sub>): δ = 7.87–7.56 (d, *J* = 8.5 Hz, 1H), 7.54–7.45 (m, 5H), 7.44–7.39 (m, 2H), 7.36–7.30 (d, *J* = 8.0 Hz, 2H), 7.24–7.16 (m, 3H), 7.12–7.05 (d, *J* = 8.0 Hz, 2H), 6.98–6.90 (t, *J* = 7.5 Hz, 1H), 6.63–6.56 (dd, *J*<sub>1</sub> = 7.5 Hz, *J*<sub>2</sub> = 1.5 Hz, 1H), 6.10–6.02 (m, 2H), 4.62–4.53 (dd, *J*<sub>1</sub> = 14.5 Hz, *J*<sub>2</sub> = 7.0 Hz, 1H), 4.27–4.18 (dd, *J*<sub>1</sub> = 15.0 Hz, *J*<sub>2</sub> = 10.5 Hz, 1H), 4.12 (s, 1H), 4.06–3.97 (dd, *J*<sub>1</sub> = 12.5 Hz, *J*<sub>2</sub> = 5.5 Hz, 1H), 3.69–3.60 (dd, *J*<sub>1</sub> = 12.5 Hz, *J*<sub>2</sub> = 2.5 Hz, 1H), 3.40–3.29 (dd, *J*<sub>1</sub> = 15.0 Hz, *J*<sub>2</sub> = 9.5 Hz, 1H), 2.67–2.57 (dd, *J*<sub>1</sub> = 15.0 Hz, *J*<sub>2</sub> = 10.5 Hz, 1H), 2.40 (s, 3H), 2.03–1.92 (m, 1H), 1.74–1.62 (m, 2H). <sup>13</sup>C NMR (125 MHz, CDCl<sub>3</sub>): δ = 171.3, 145.0, 143.9, 140.5, 136.4, 136.2, 135.6, 131.8, 131.1, 130.9, 129.3, 128.5, 128.4, 128.1, 127.0, 125.1, 123.2, 121.9, 121.8, 121.7, 93.6, 62.3, 58.4, 48.1, 38.4, 30.6, 24.9, 21.6. IR (KBr): ν (cm<sup>-1</sup>) 2918, 1662, 1599, 1488, 1332, 1287, 1159, 727, 665. HRMS (ESI, *m/z*) calcd for C<sub>35</sub>H<sub>32</sub>BrN<sub>3</sub>O<sub>4</sub>S [M+H]<sup>+</sup>: 670.1375, found: 670.1368.

**((6*S*,7*R*,14*aR*,*E*)-11-(4-methoxyphenyl)-8-tosyl-8,9,12,13,14,14*a*-hexahydro-6,14-(epoxymethano)[1,2]diazonino[1,9-*c*]quinazolin-5(6*H*)-yl)(phenyl)methanone**

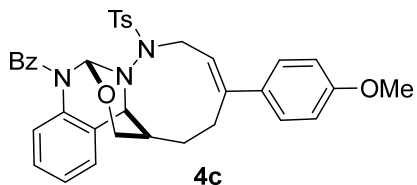

**4c** was obtained as white solid, 40.5 mg, 65% yield, dr > 20:1, m. p. 211–213 °C. <sup>1</sup>H NMR (500 MHz, CDCl<sub>3</sub>): δ = 7.89–7.82 (d, *J* = 8.5 Hz, 1H), 7.55–7.46 (m, 3H), 7.45–7.40 (t, *J* = 7.5 Hz, 2H), 7.36–7.32 (d, *J* = 8.0 Hz, 2H), 7.27 (s, 2H), 7.23–7.17 (m, 1H), 7.10–7.05 (d, *J* = 8.0 Hz, 2H), 6.95–6.87 (m, 3H), 6.57–6.52 (dd, *J*<sub>1</sub> = 8.0 Hz, *J*<sub>2</sub> = 1.5 Hz, 1H), 6.12–6.08 (d, *J* = 1.5 Hz, 1H), 6.04–5.97 (dd, *J*<sub>1</sub> = 10.5 Hz, *J*<sub>2</sub> = 7.0 Hz, 1H), 4.63–4.53 (dd, *J*<sub>1</sub> = 15.0 Hz, *J*<sub>2</sub> = 7.0 Hz, 1H), 4.27–4.17 (dd, *J*<sub>1</sub> = 15.0 Hz, *J*<sub>2</sub> = 10.0 Hz, 1H), 4.11 (s, 1H), 4.02–3.93 (dd, *J*<sub>1</sub> = 12.5 Hz, *J*<sub>2</sub> = 5.5 Hz, 1H), 3.84 (s, 3H), 3.71–3.62 (dd, *J*<sub>1</sub> = 12.0 Hz, *J*<sub>2</sub> = 3.0 Hz, 1H), 3.36–3.26 (dd, *J*<sub>1</sub> = 14.5 Hz, *J*<sub>2</sub> = 9.0 Hz, 1H), 2.69–2.58 (dd, *J*<sub>1</sub> = 15.0 Hz, *J*<sub>2</sub> = 10.0 Hz, 1H), 2.40 (s, 3H), 2.00–1.89 (m, 1H), 1.77–1.62 (m, 2H). <sup>13</sup>C NMR (125 MHz, CDCl<sub>3</sub>): δ = 171.2, 159.3, 145.5, 143.7, 136.3, 136.2, 135.9, 133.7, 131.2, 130.8, 129.2, 128.5, 128.4, 128.0, 127.8, 126.9, 125.0, 123.1, 121.9, 119.6, 113.9, 93.8, 62.2, 58.1, 55.3, 48.3, 38.9, 30.4, 24.6, 21.6. HRMS (ESI, *m/z*) calcd for C<sub>36</sub>H<sub>35</sub>N<sub>3</sub>O<sub>5</sub>S [M+H]<sup>+</sup>: 622.2375, found: 622.2373.

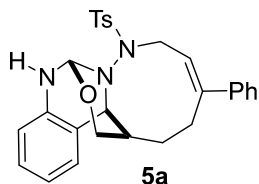

**5a** was obtained as white solid, 41.6 mg, 85% yield, dr > 20:1, m. p. 213–215 °C. <sup>1</sup>H NMR (500 MHz, CDCl<sub>3</sub>): δ = 7.77–7.72 (m, 2H), 7.39–7.35 (m, 2H), 7.35–7.24 (m, 6H), 7.17–7.13 (dd, *J*<sub>1</sub> = 7.9 Hz, *J*<sub>2</sub> = 1.5 Hz, 1H), 7.11–7.06 (m, 1H), 7.03–6.99 (dd, *J*<sub>1</sub> = 7.9 Hz, *J*<sub>2</sub> = 1.5 Hz, 1H), 6.58 (s, 1H), 6.28–6.22 (t, *J* = 8.1 Hz, 1H), 5.31–5.25 (d, *J* = 3.7 Hz, 1H), 4.65–4.55 (dd, *J*<sub>1</sub> = 14.9 Hz, *J*<sub>2</sub> = 8.5 Hz, 1H), 3.89–3.80 (dd, *J*<sub>1</sub> = 14.9 Hz, *J*<sub>2</sub> = 7.8 Hz, 1H), 3.42–3.33 (t, *J* = 10.2 Hz, 1H), 3.17–3.08 (dd, *J*<sub>1</sub> = 10.8 Hz, *J*<sub>2</sub> = 7.0 Hz, 1H), 2.72–2.58 (m, 2H), 2.55–2.44 (m, 1H), 2.41 (s, 3H), 1.98 (s, 1H), 1.40–1.28 (m, 1H), 1.03–0.92 (m, 1H). <sup>13</sup>C NMR (125 MHz, CDCl<sub>3</sub>): δ = 148.4, 146.3, 145.4, 141.2, 140.2, 133.3, 130.4, 128.7, 128.6, 128.4, 128.2, 127.7, 126.2, 125.7, 125.4, 122.1, 121.6, 63.7, 60.5, 47.6, 41.3, 29.7, 29.7, 22.2, 21.7. IR (KBr): ν (cm<sup>−1</sup>) 2184, 2167, 2160, 2139, 2028, 2018, 1614, 1597, 1165, 1088, 762, 687. HRMS (ESI, *m/z*) calcd for C<sub>28</sub>H<sub>30</sub>N<sub>3</sub>O<sub>3</sub>S [M+H]<sup>+</sup>: 488.2008, found: 488.2013.

## NMR Spectra of the Compounds 1, 3 and 4

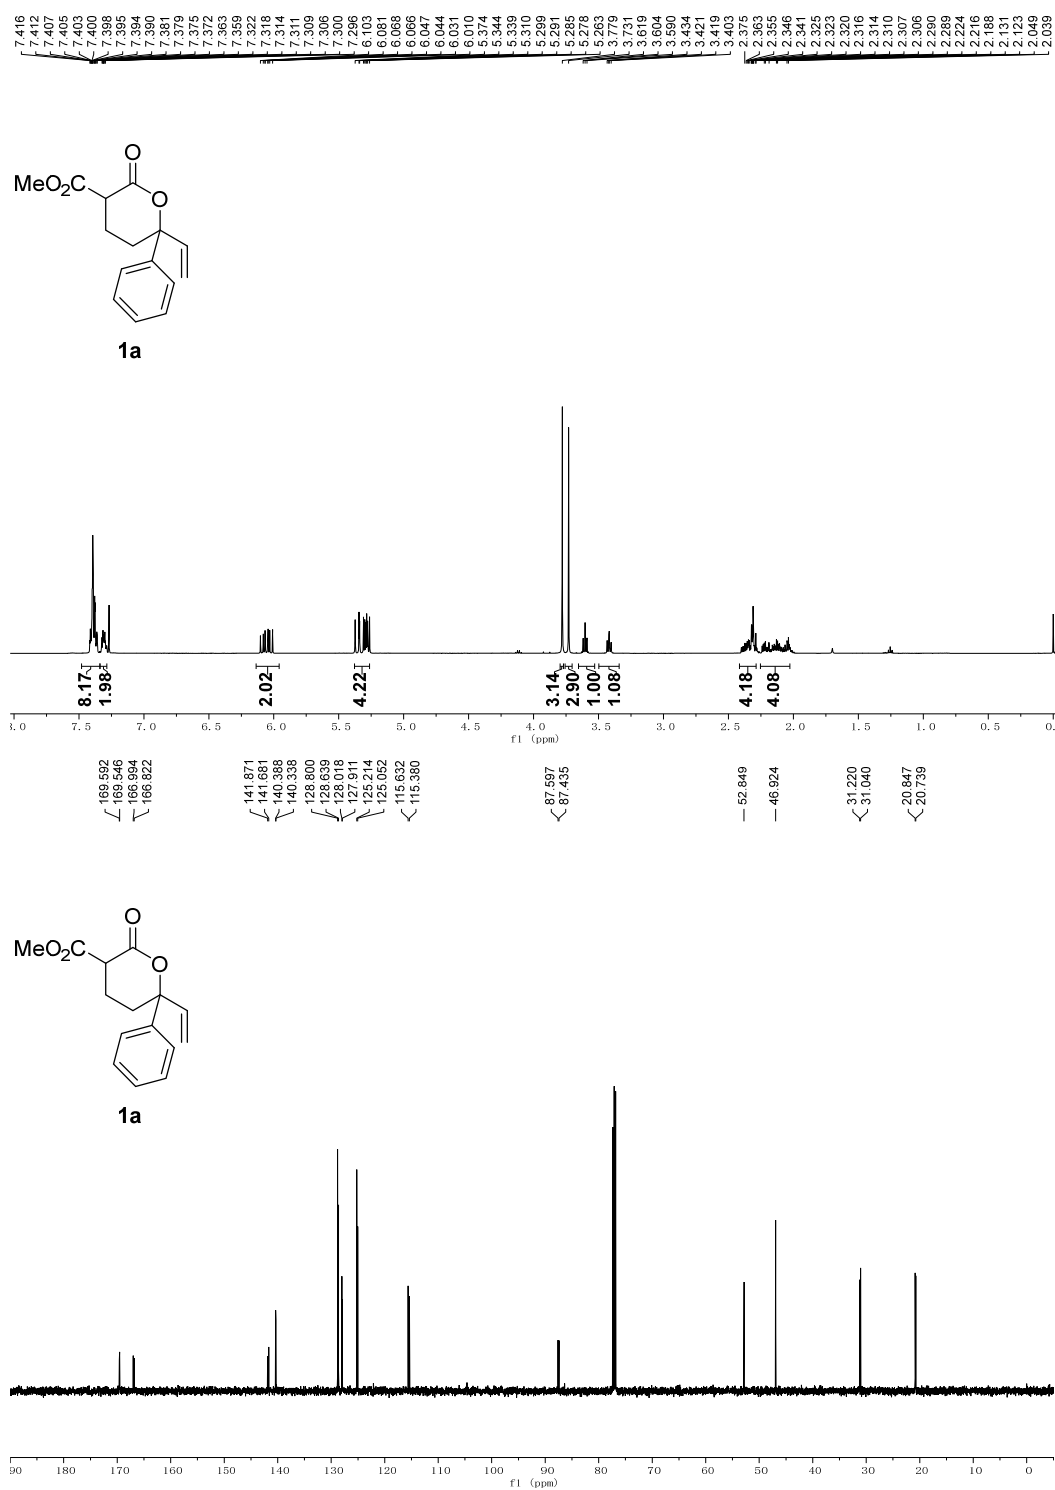

<sup>1</sup>H NMR (500 MHz) and <sup>13</sup>C NMR (125 MHz) spectra of **1a**

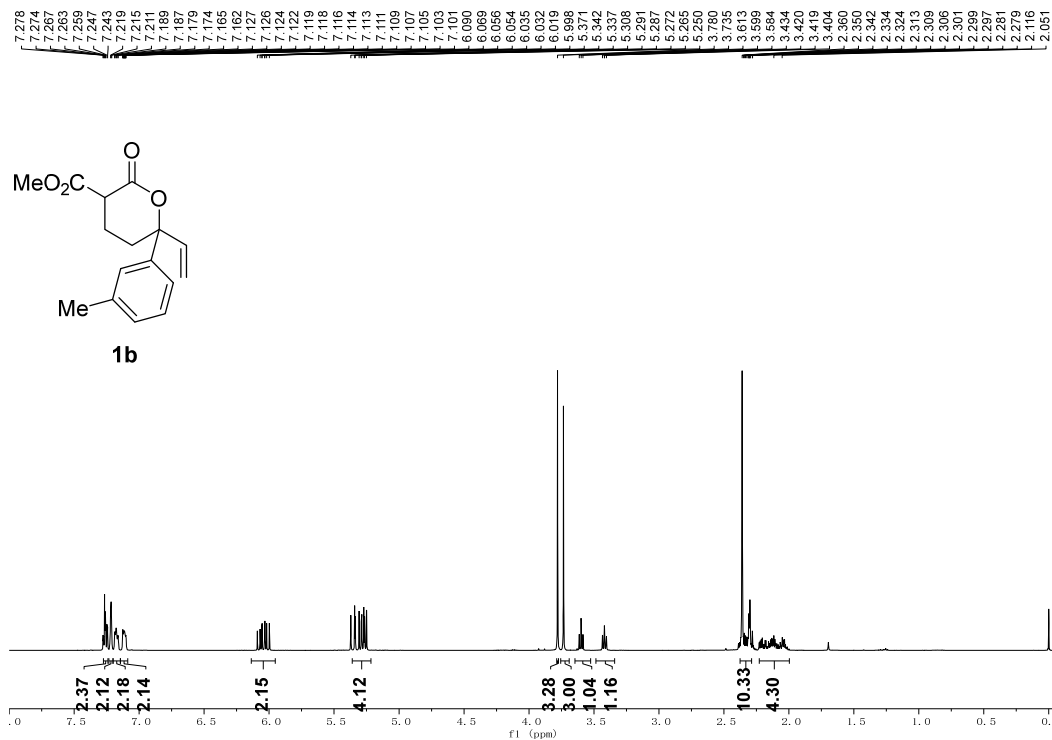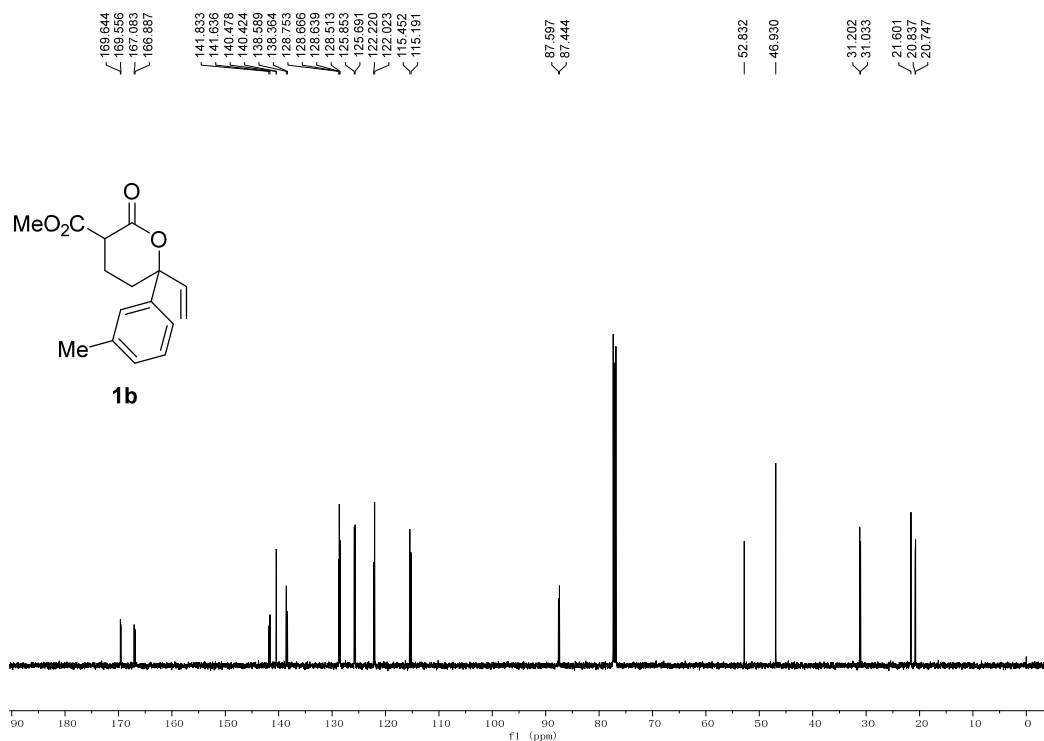

<sup>1</sup>H NMR (500 MHz) and <sup>13</sup>C NMR (125 MHz) spectra of **1b**



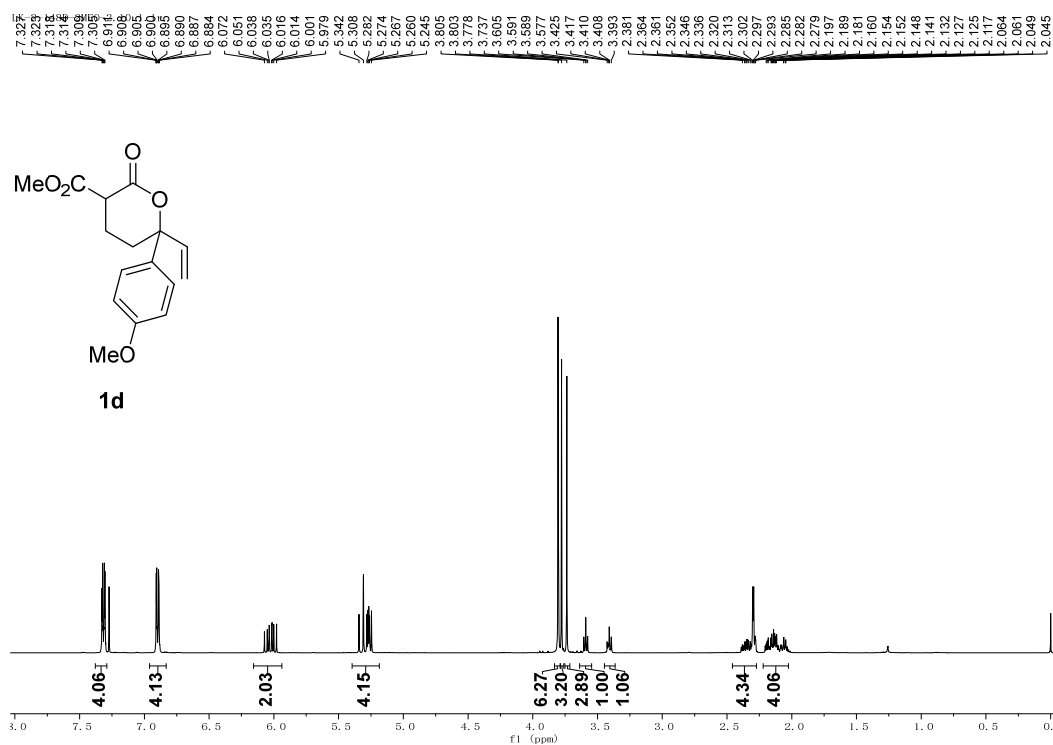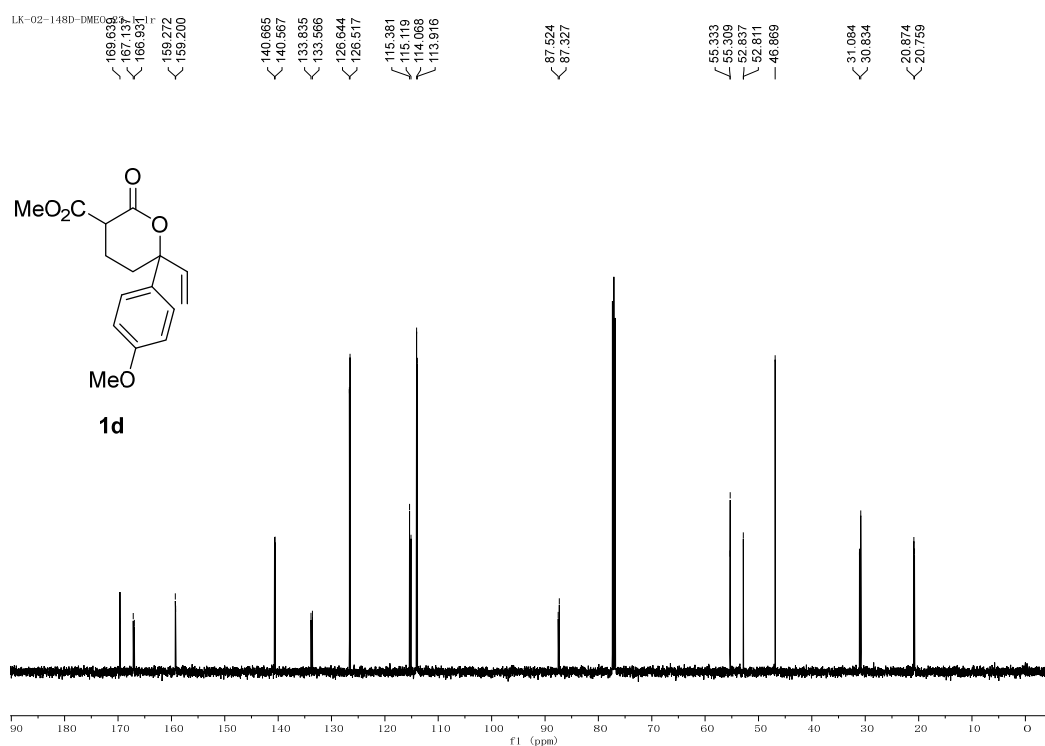

<sup>1</sup>H NMR (500 MHz) and <sup>13</sup>C NMR (125 MHz) spectra of **1d**

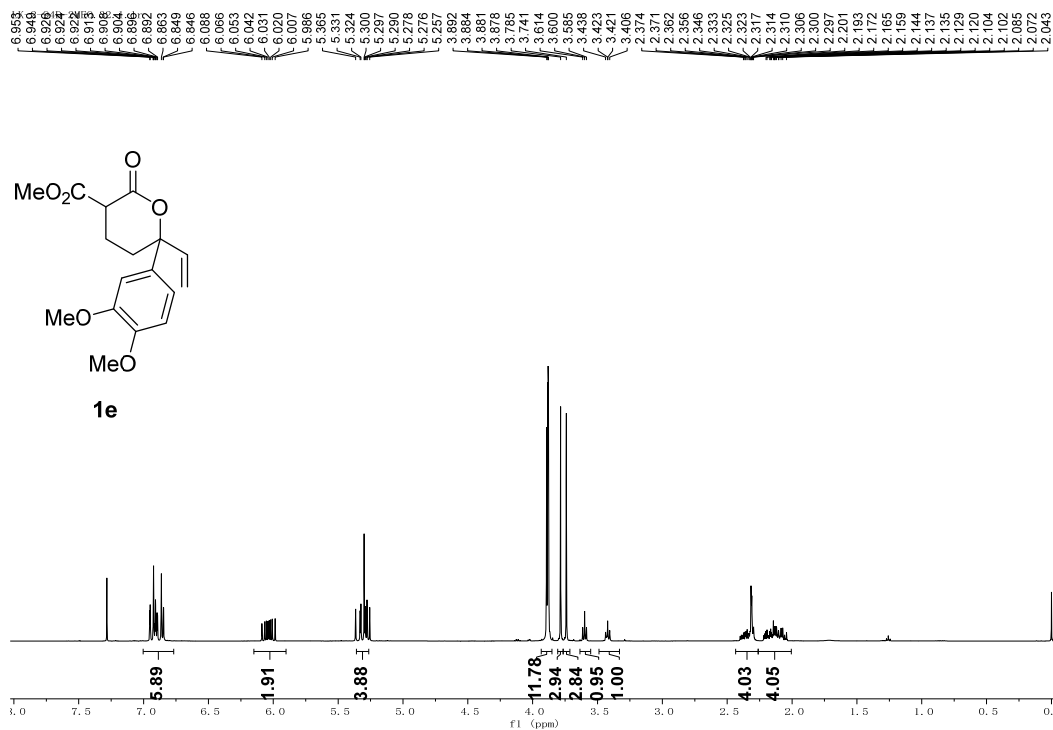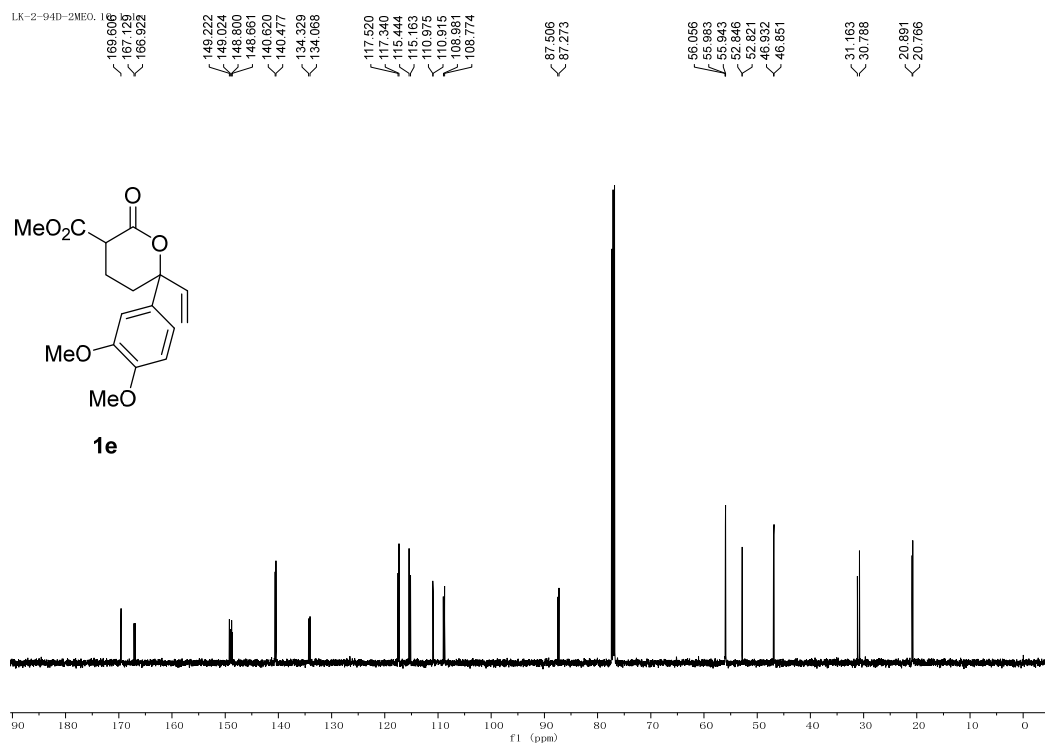

$^1\text{H}$  NMR (500 MHz) and  $^{13}\text{C}$  NMR (125 MHz) spectra of **1e**

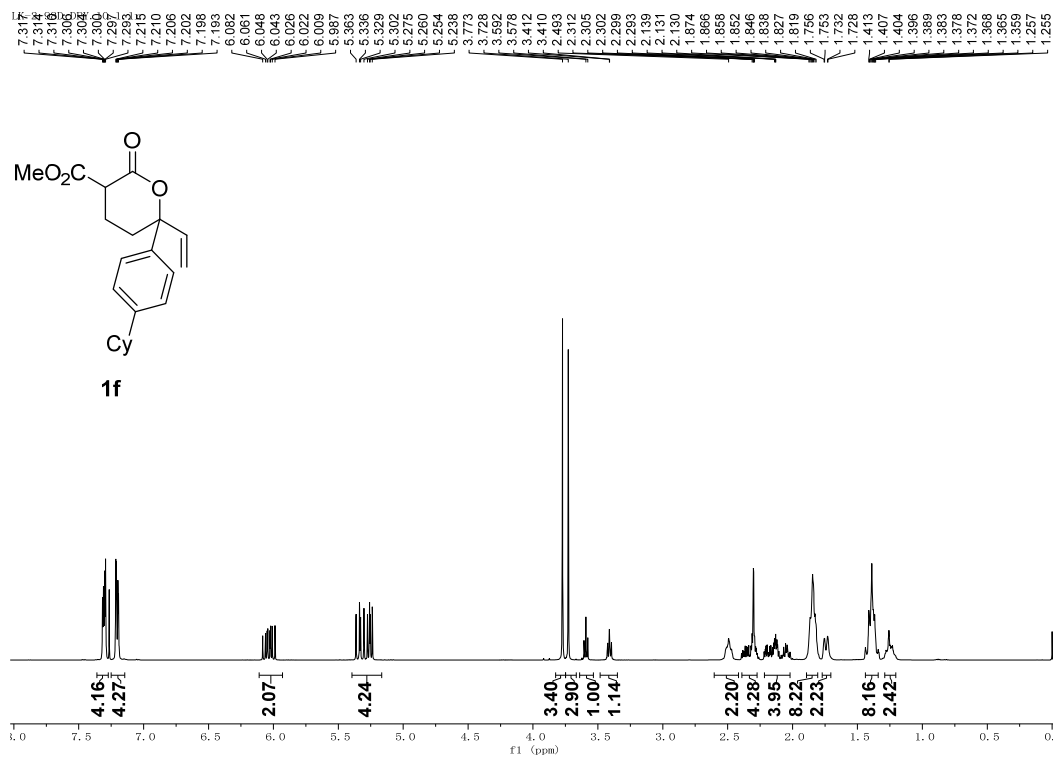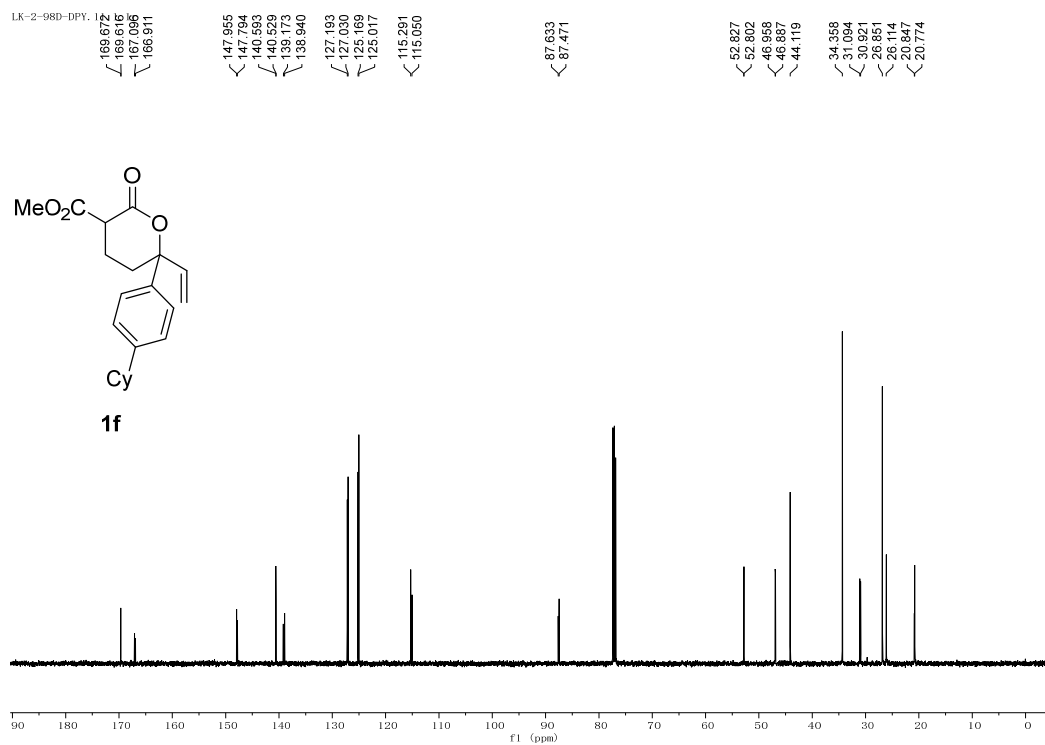

<sup>1</sup>H NMR (500 MHz) and <sup>13</sup>C NMR (125 MHz) spectra of **1f**

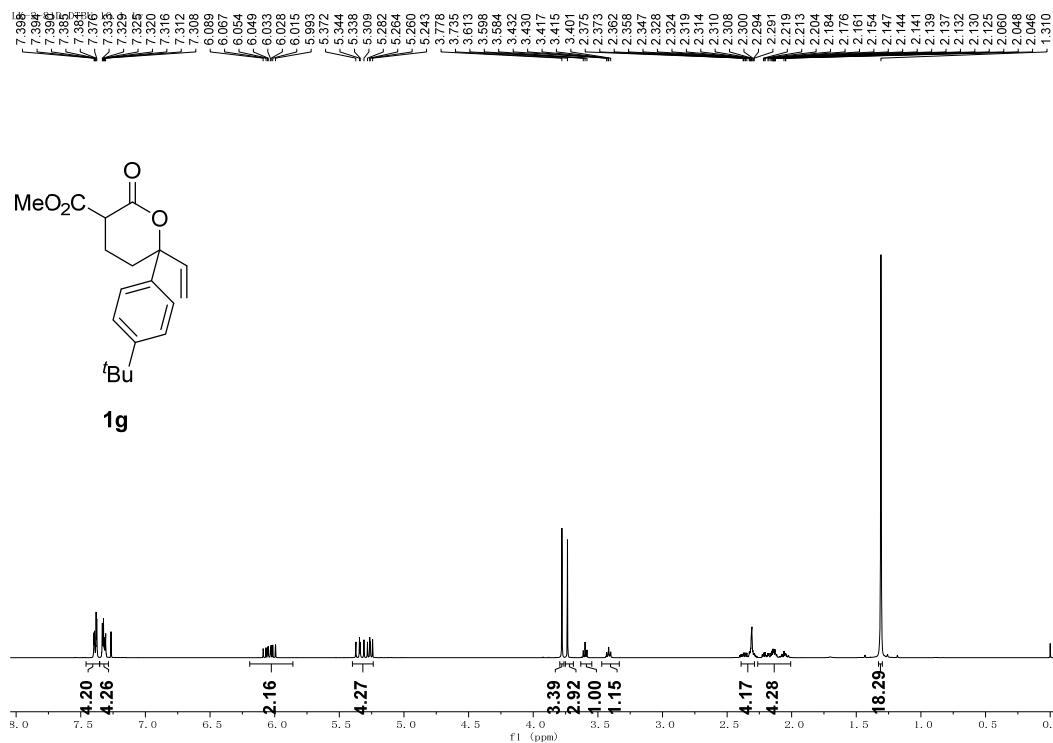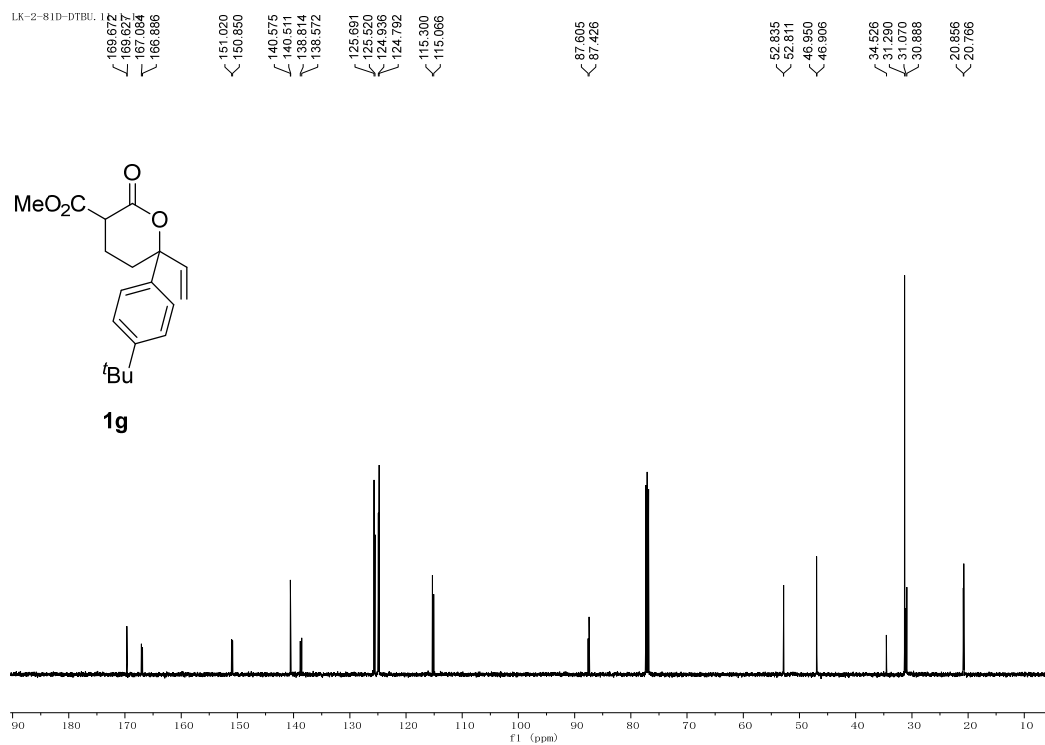

<sup>1</sup>H NMR (500 MHz) and <sup>13</sup>C NMR (125 MHz) spectra of **1g**

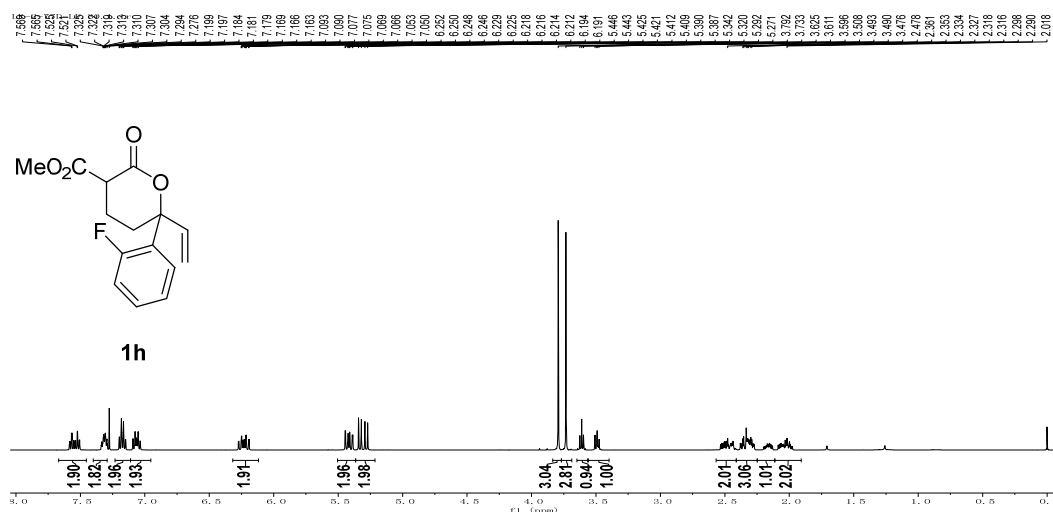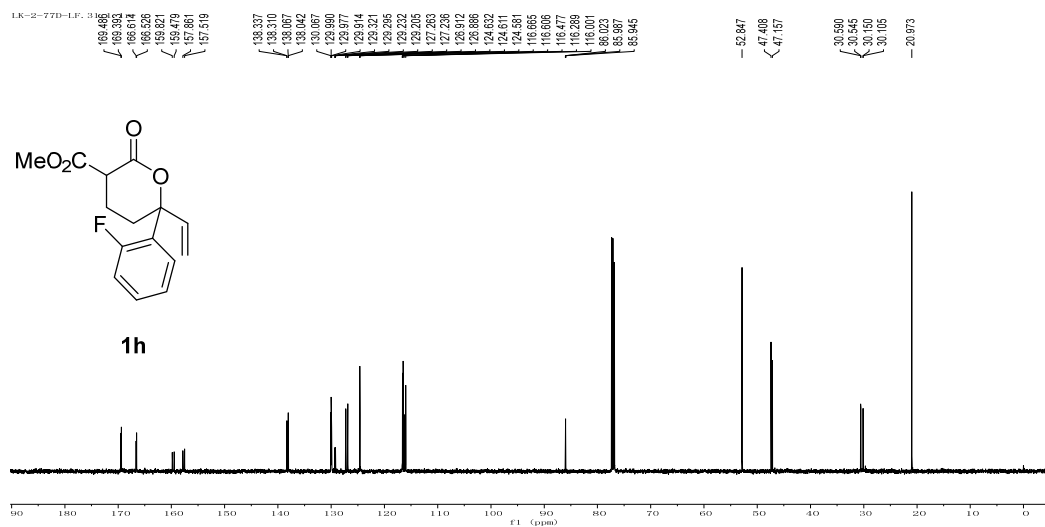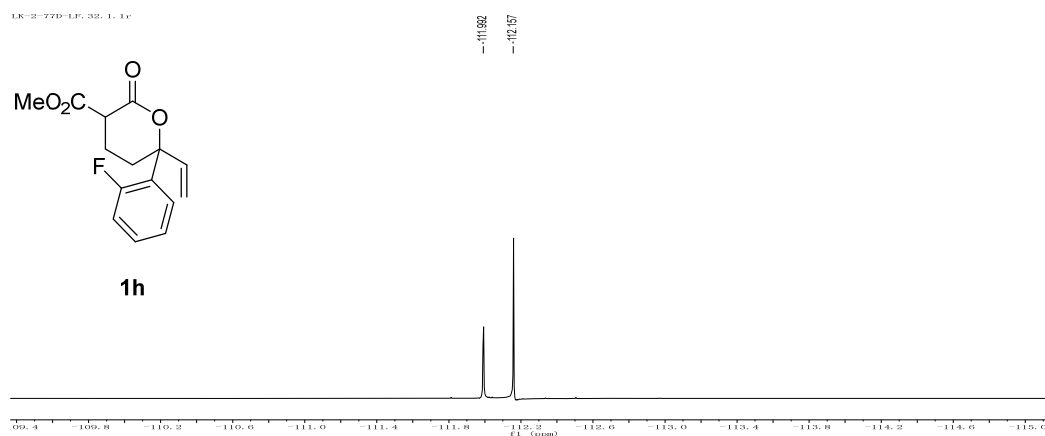

<sup>1</sup>H NMR (500 MHz) <sup>13</sup>C NMR (125 MHz) and <sup>19</sup>F NMR (470 MHz) spectra of **1h**

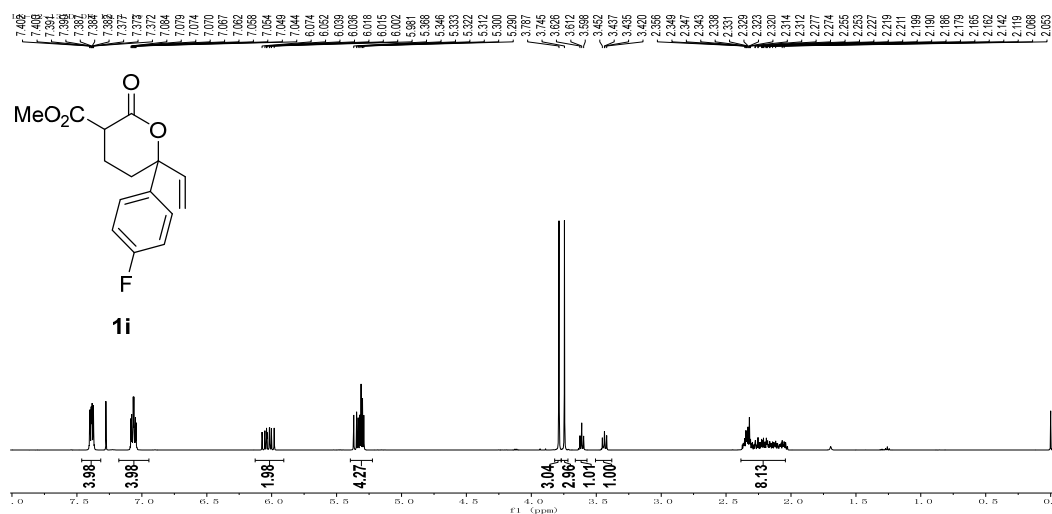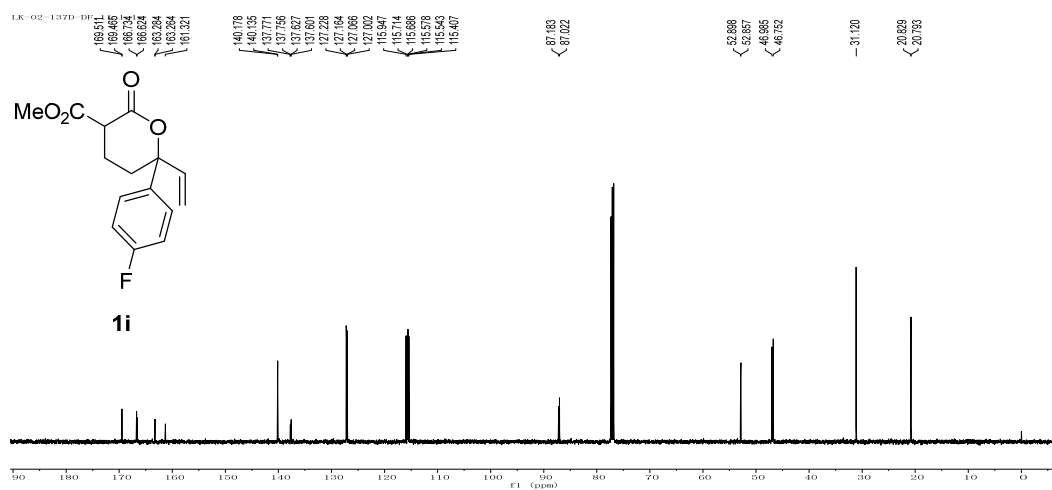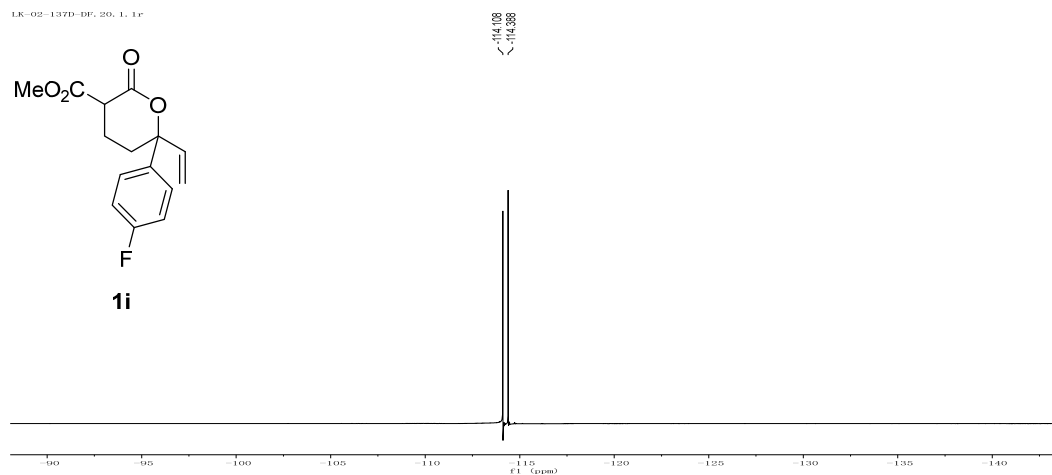

<sup>1</sup>H NMR (500 MHz) <sup>13</sup>C NMR (125 MHz) and <sup>19</sup>F NMR (470 MHz) spectra of **1i**

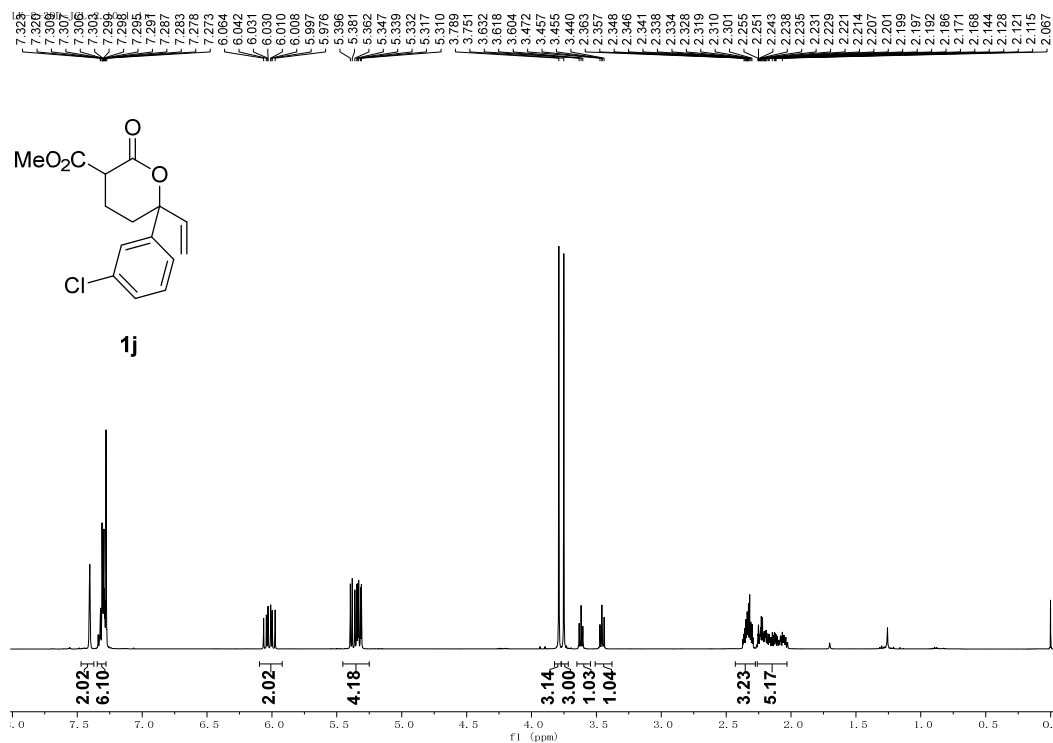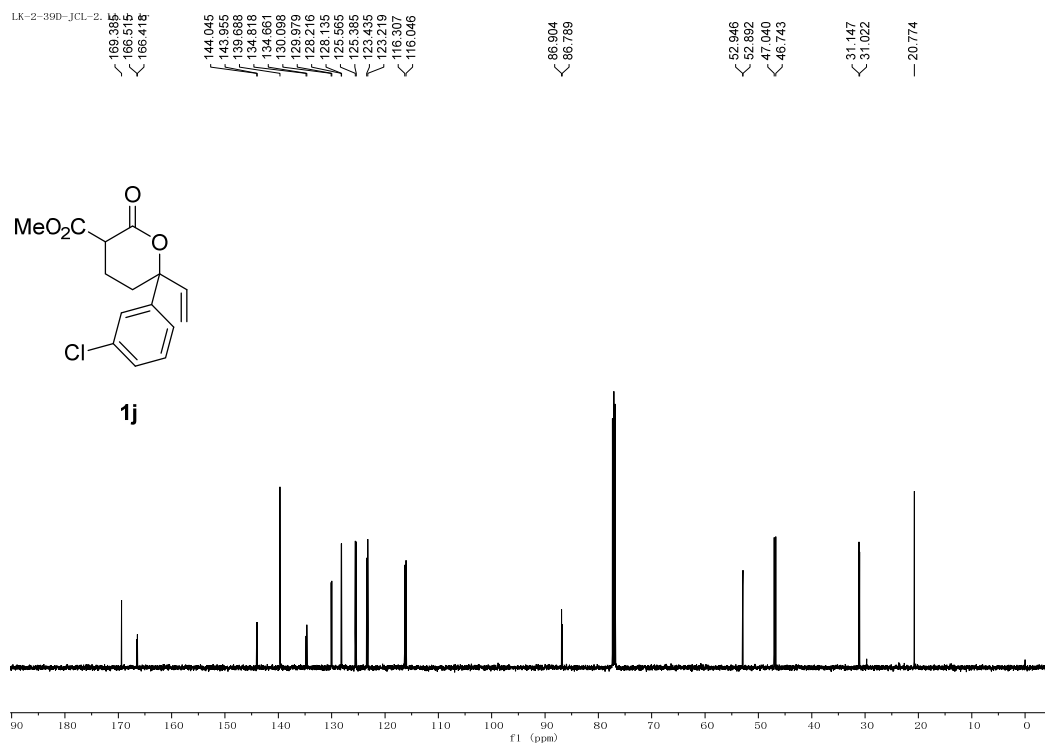

<sup>1</sup>H NMR (500 MHz) and <sup>13</sup>C NMR (125 MHz) spectra of **1j**

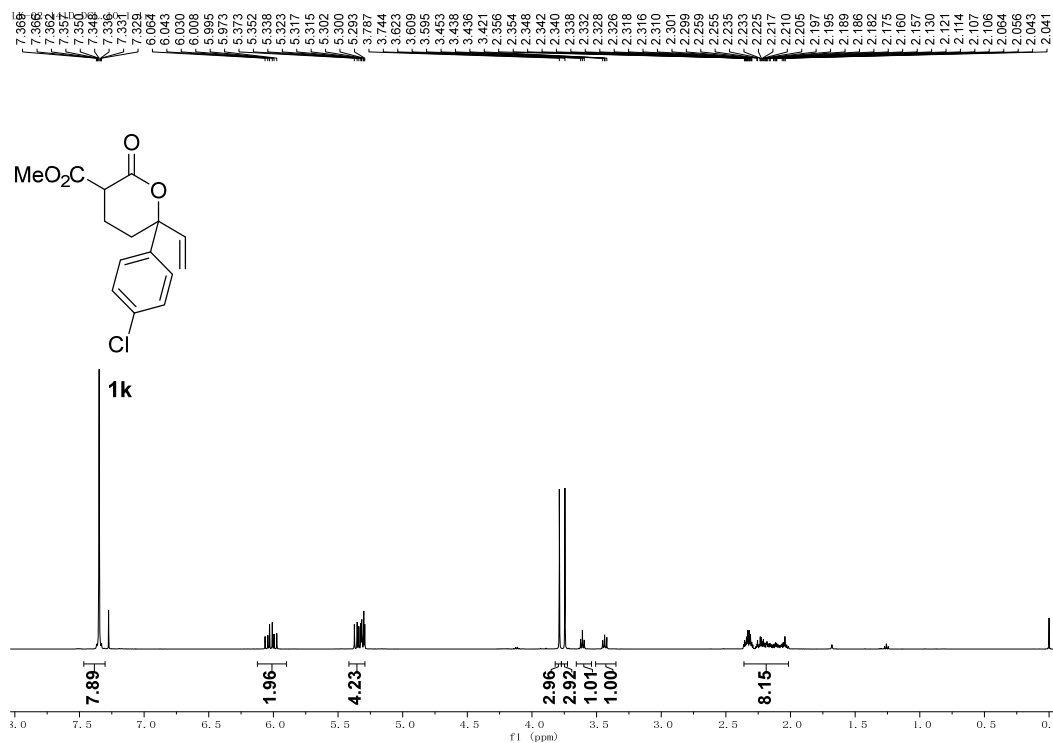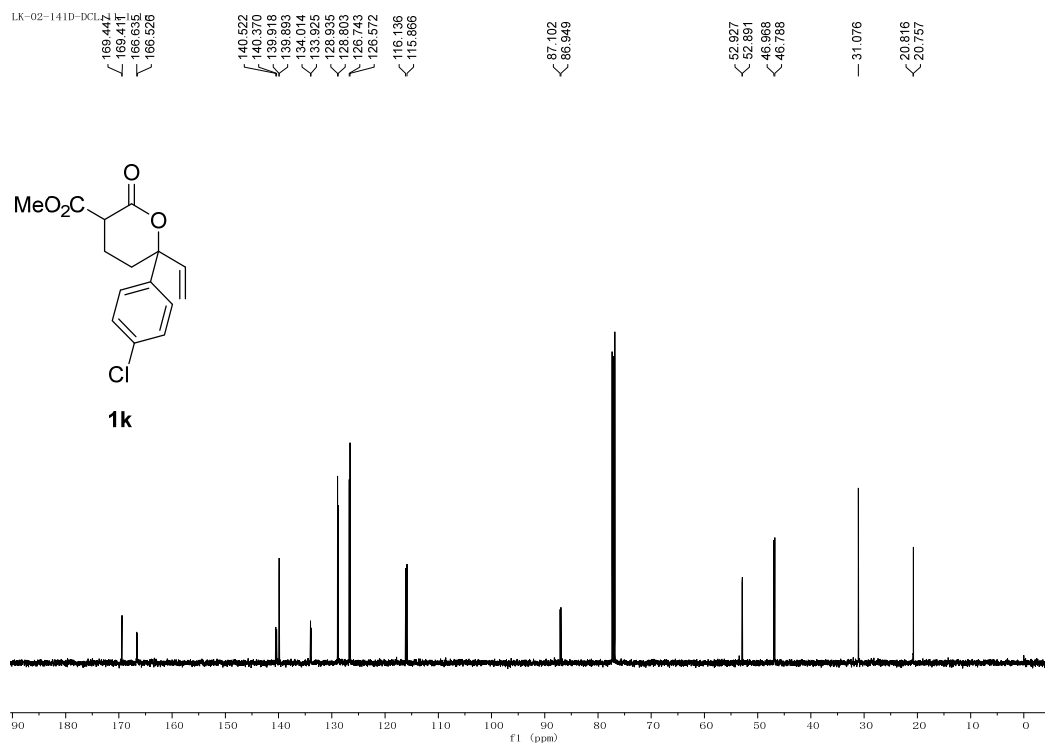

<sup>1</sup>H NMR (500 MHz) and <sup>13</sup>C NMR (125 MHz) spectra of **1k**

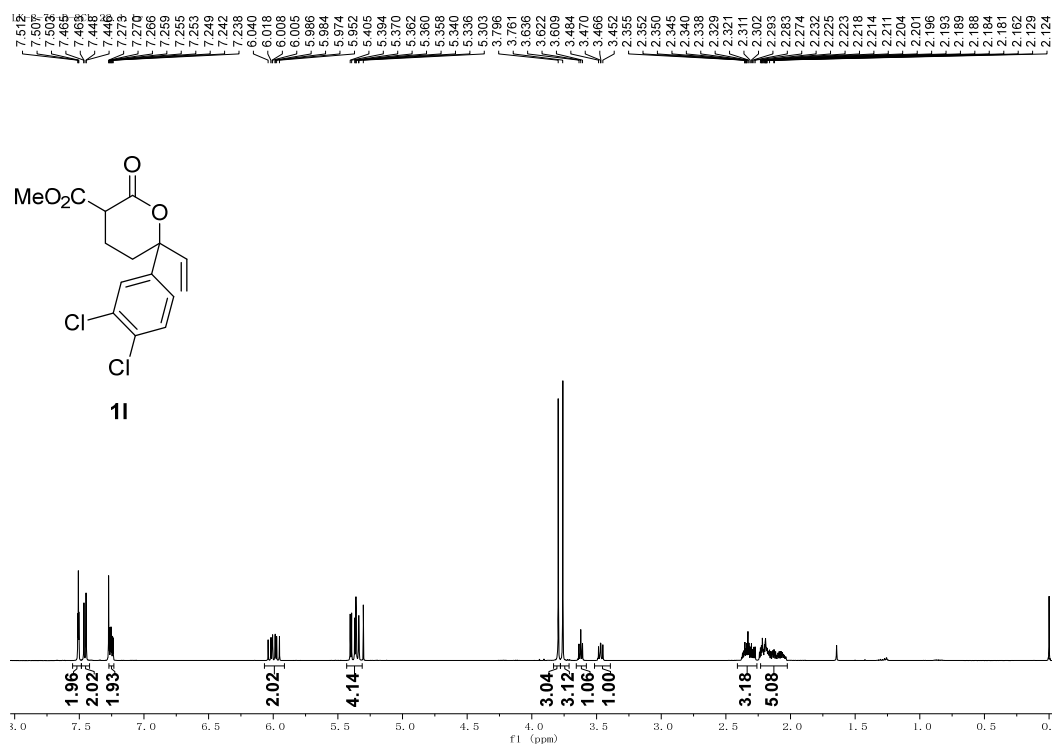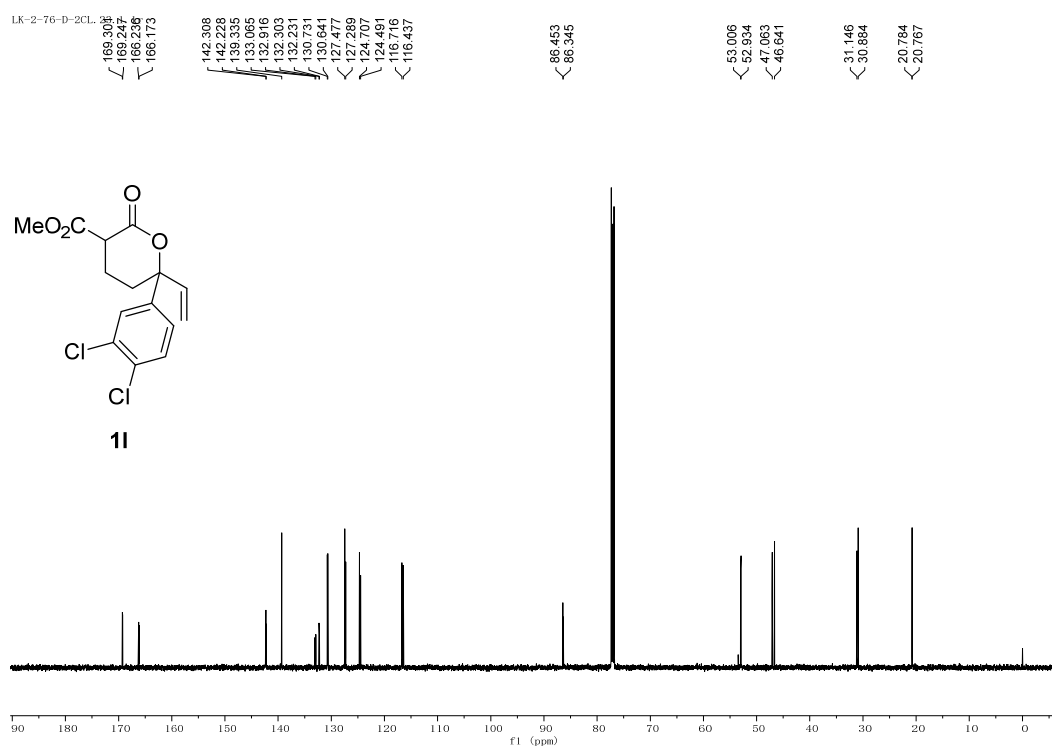

<sup>1</sup>H NMR (500 MHz) and <sup>13</sup>C NMR (125 MHz) spectra of **11**



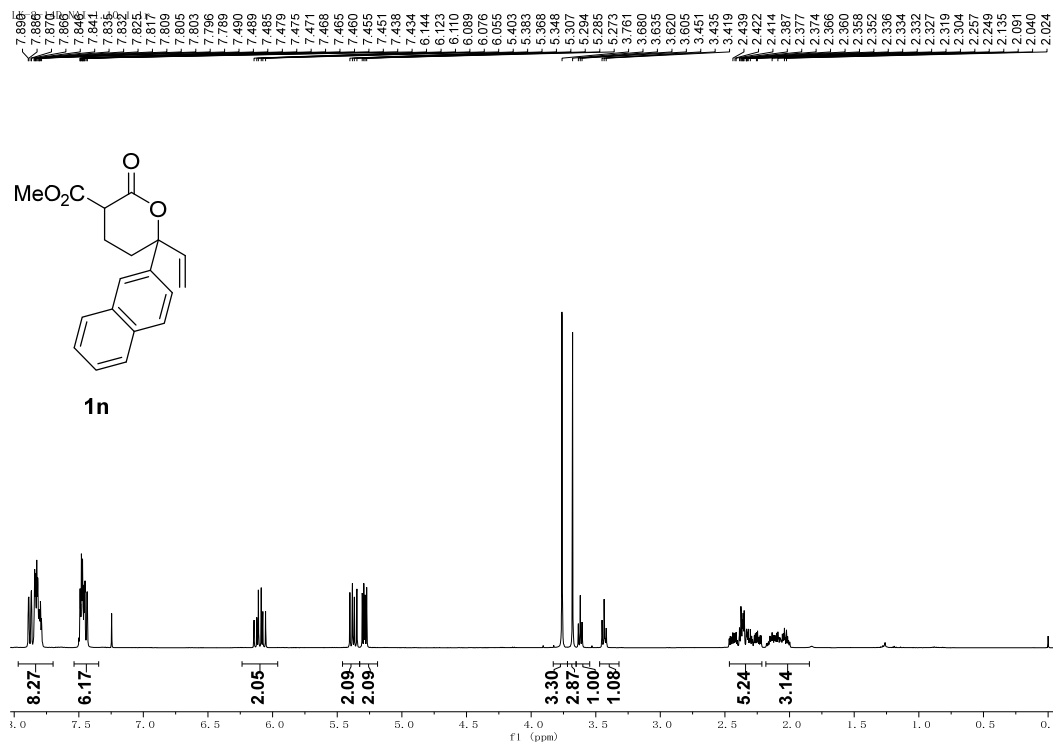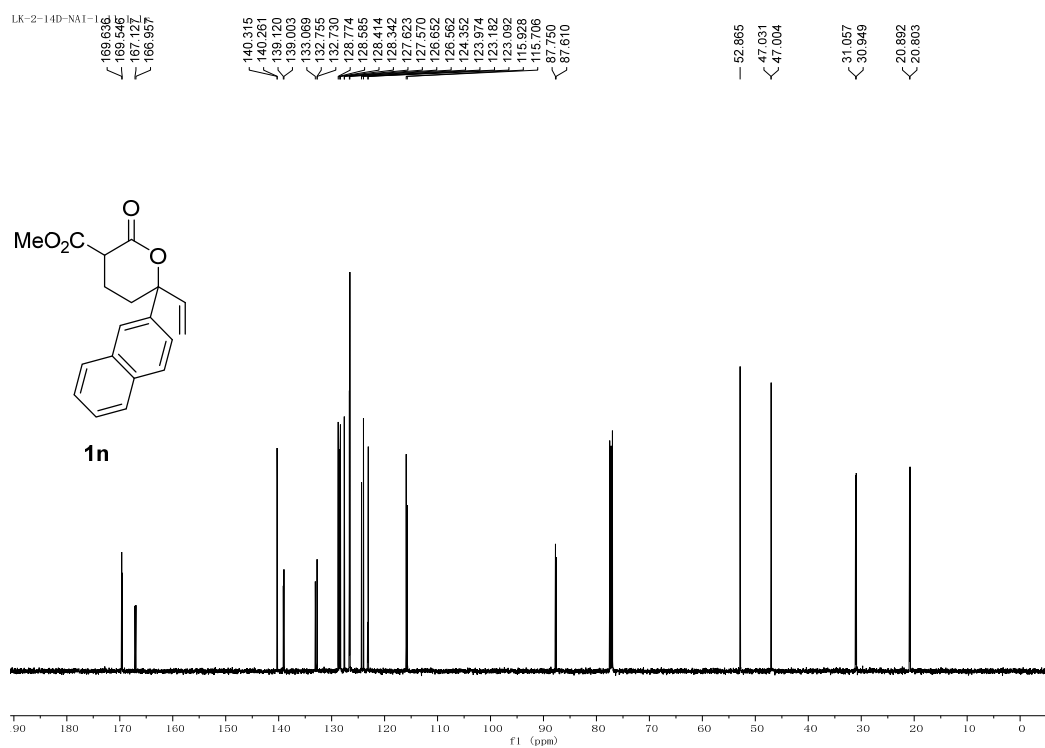

<sup>1</sup>H NMR (500 MHz) and <sup>13</sup>C NMR (125 MHz) spectra of **1n**

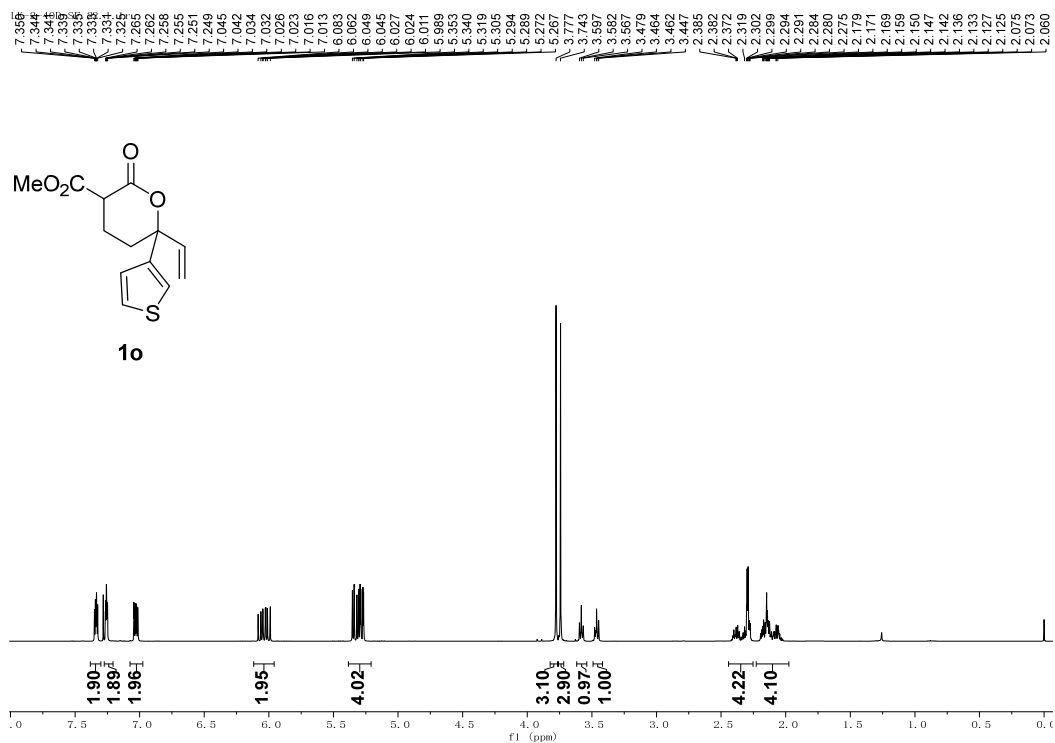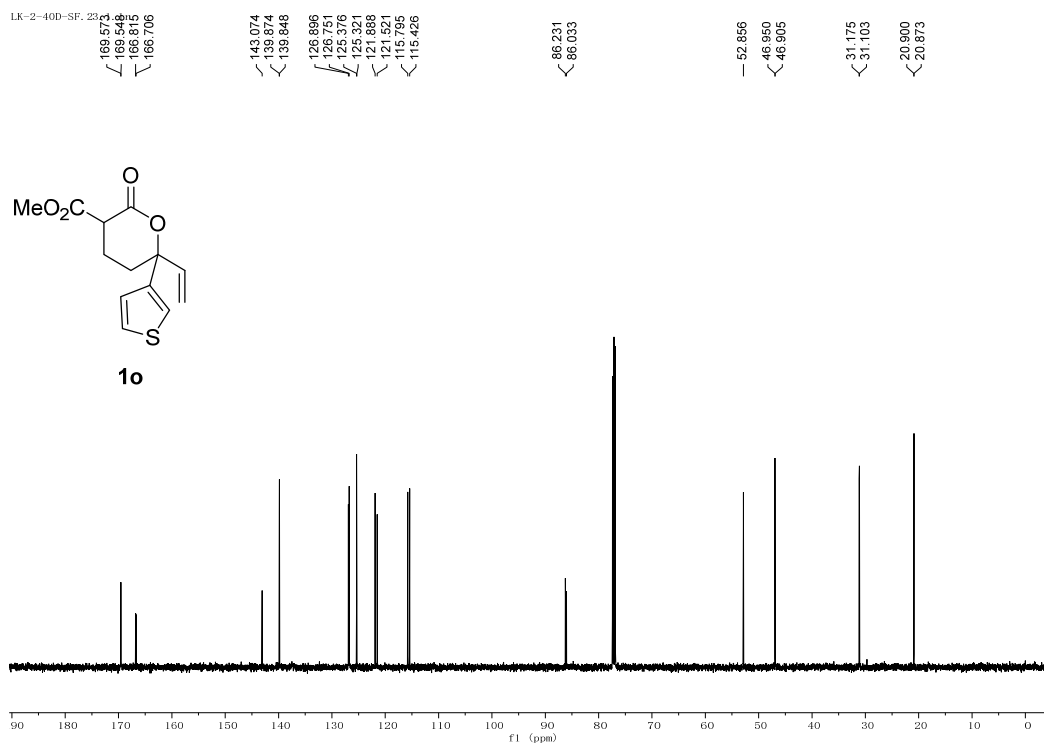

<sup>1</sup>H NMR (500 MHz) and <sup>13</sup>C NMR (125 MHz) spectra of **1o**

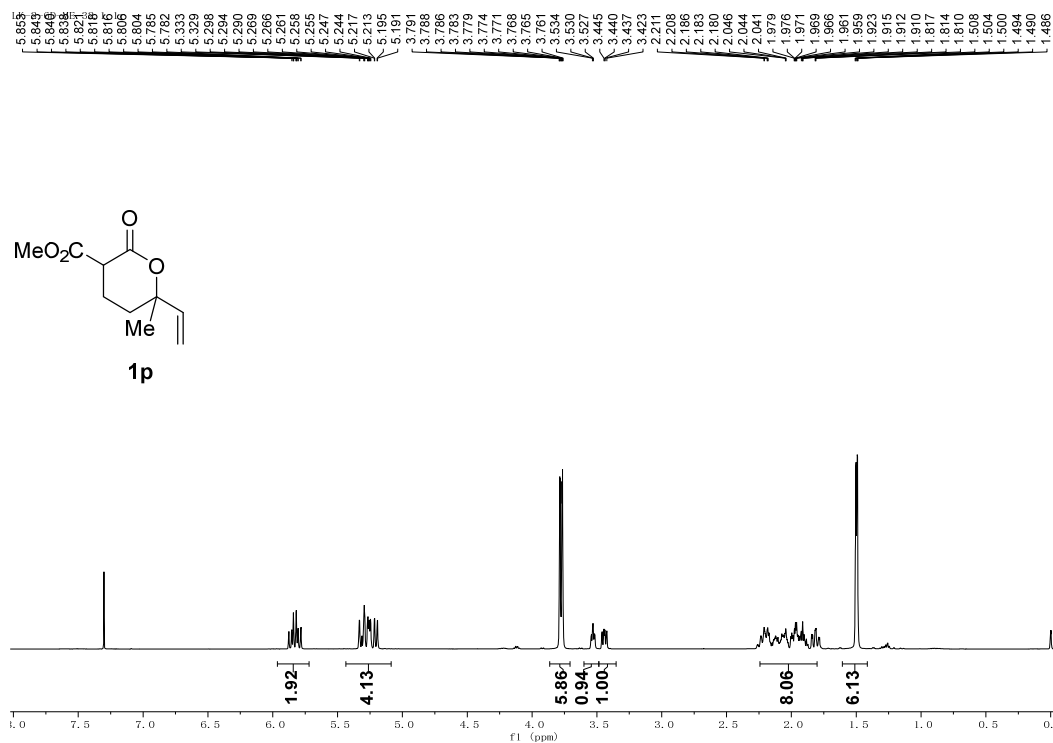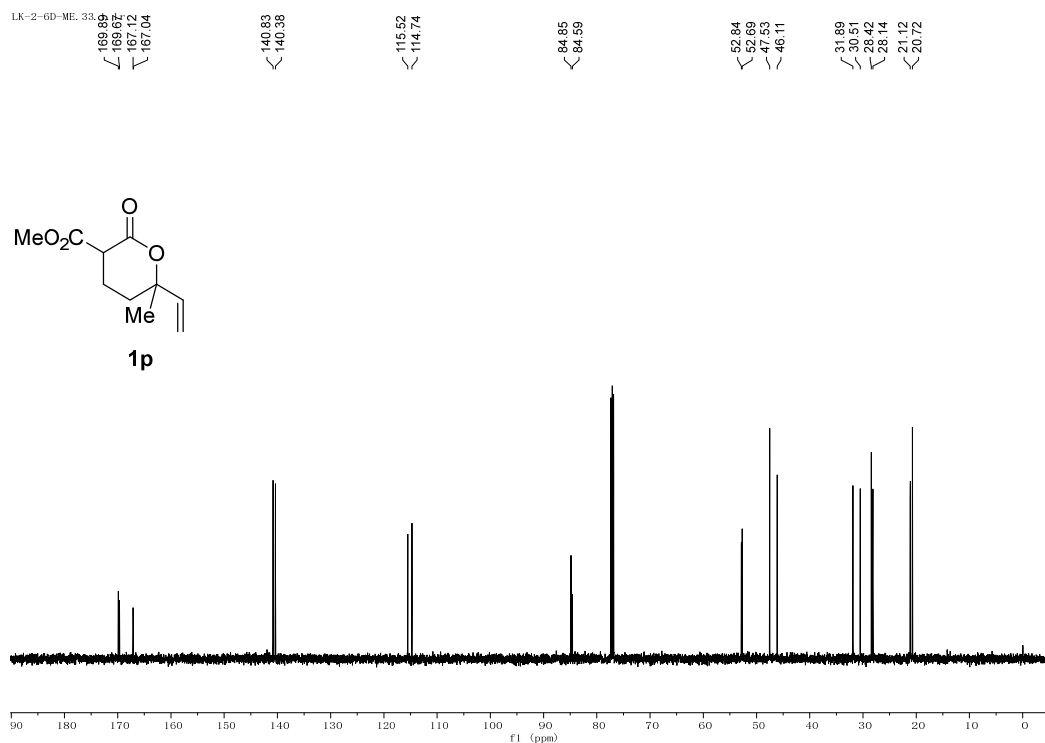

<sup>1</sup>H NMR (500 MHz) and <sup>13</sup>C NMR (125 MHz) spectra of **1p**

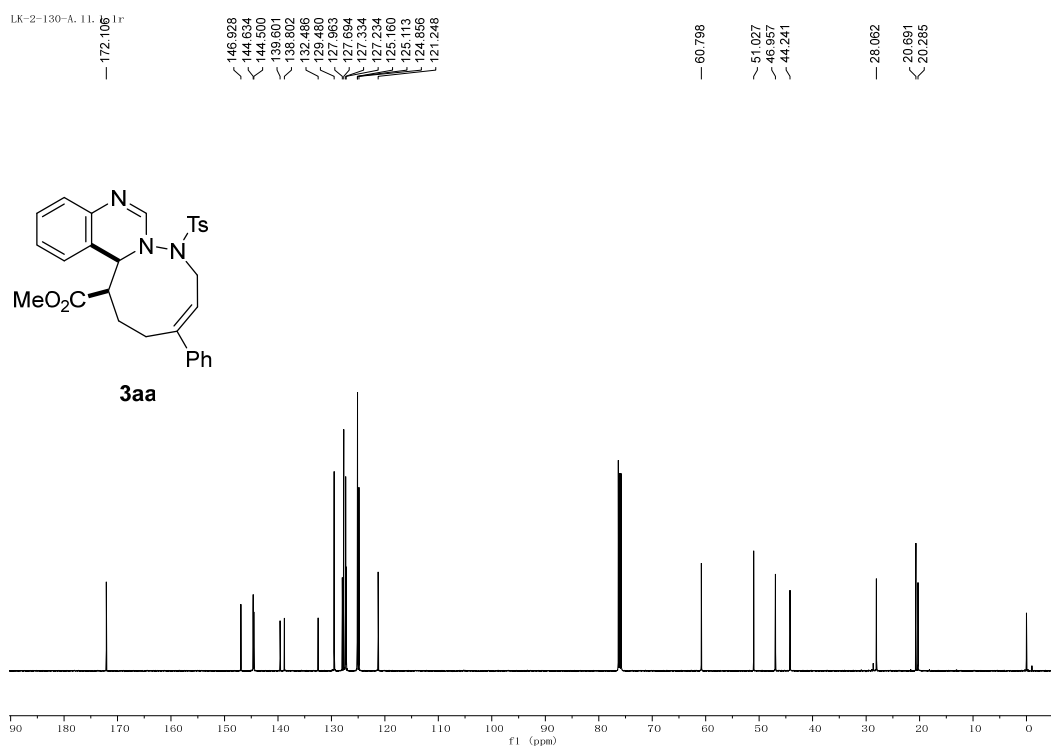

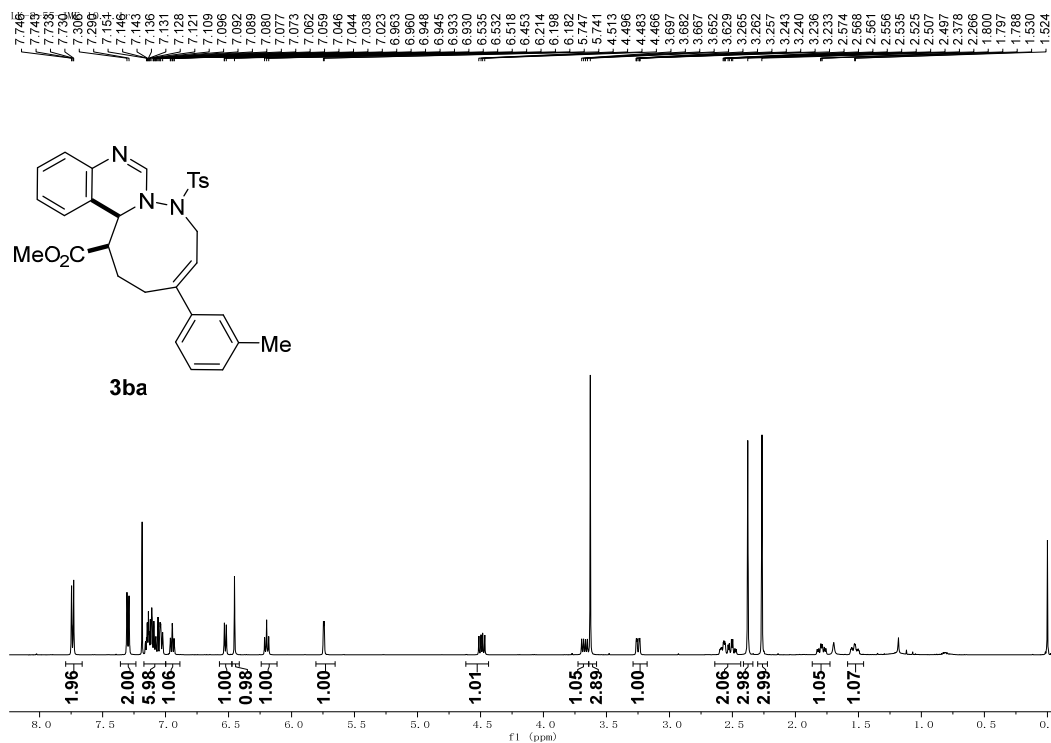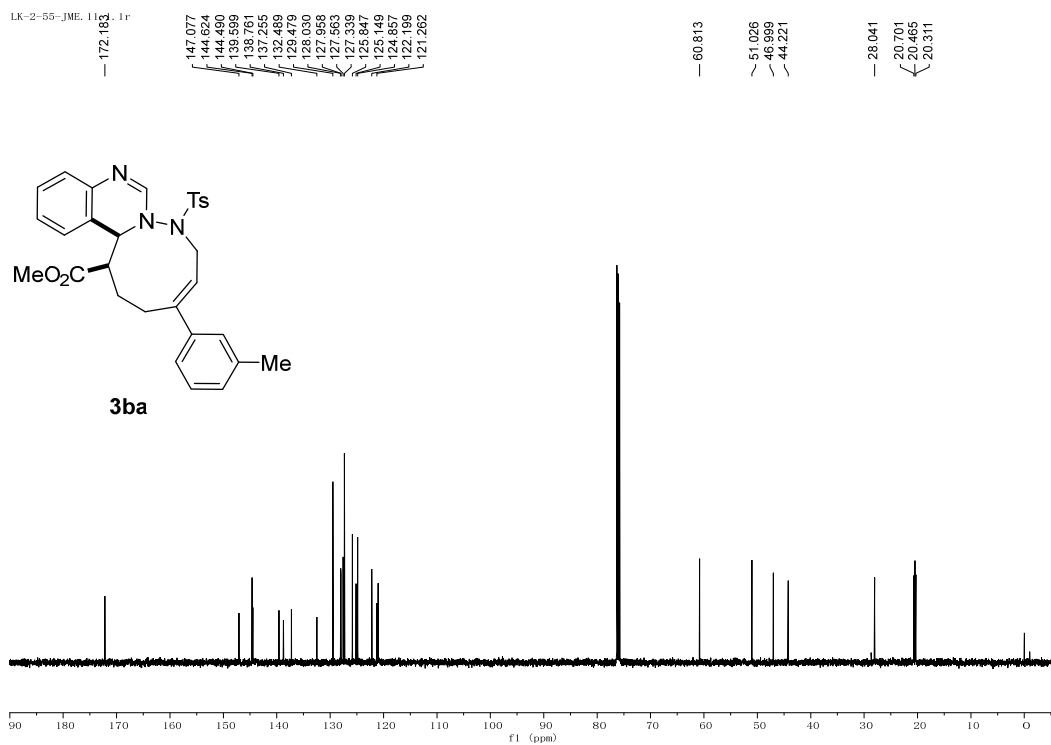

<sup>1</sup>H NMR (500 MHz) and <sup>13</sup>C NMR (125 MHz) spectra of **3ba**



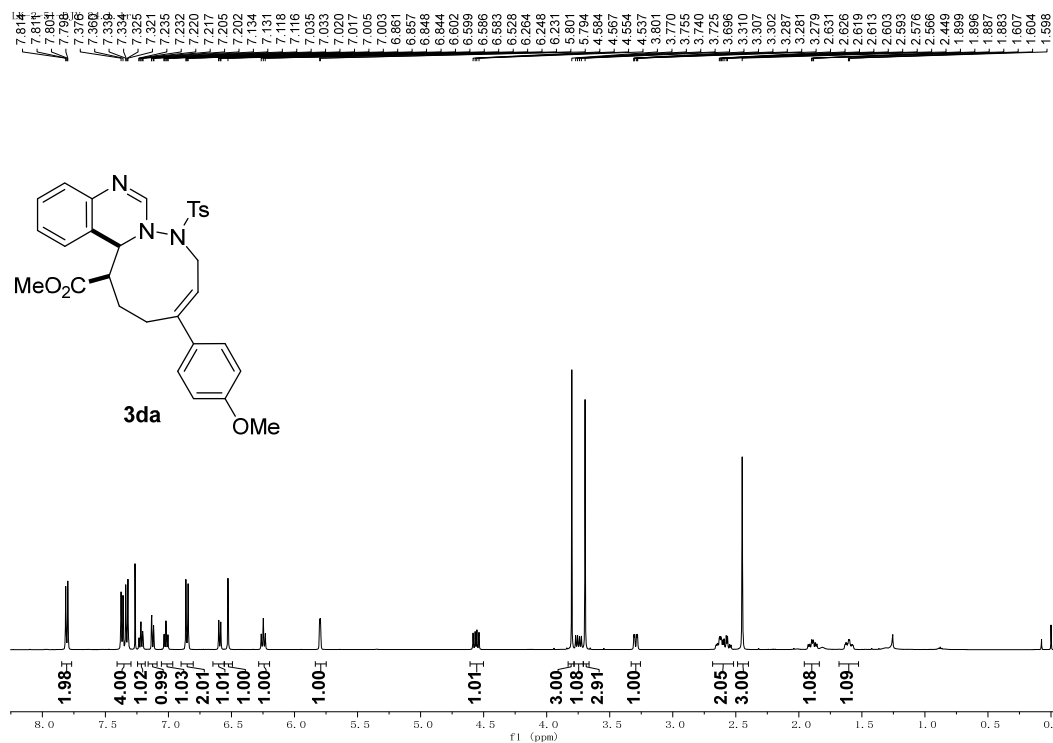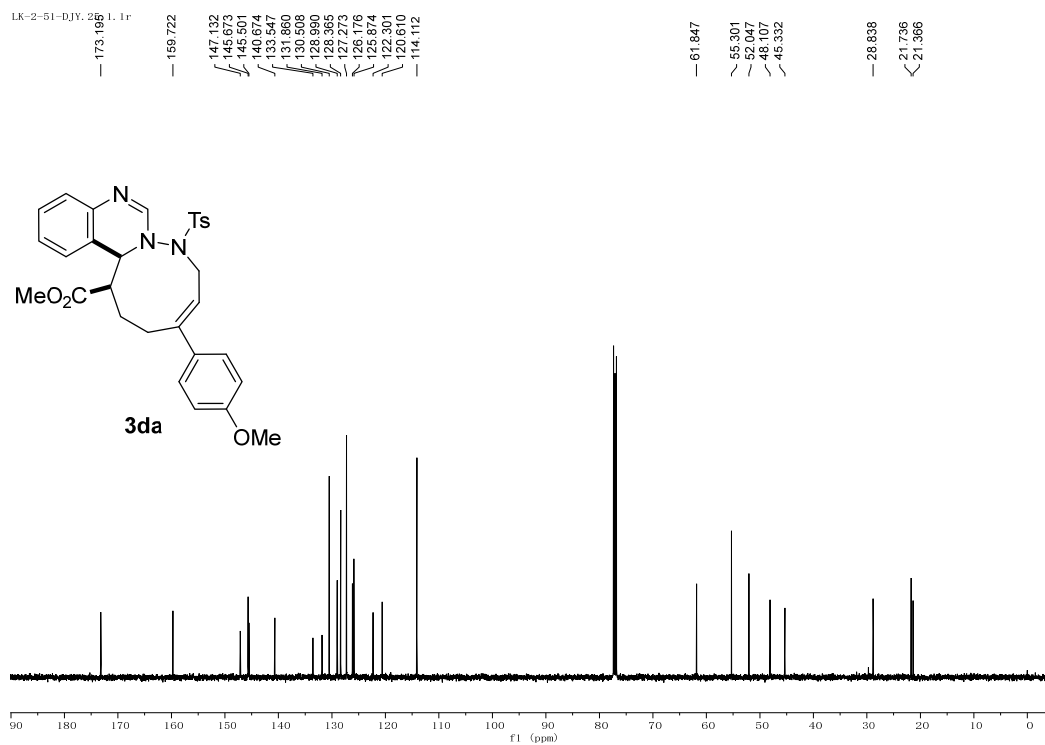

**<sup>1</sup>H NMR (500 MHz) and <sup>13</sup>C NMR (125 MHz) spectra of 3da**

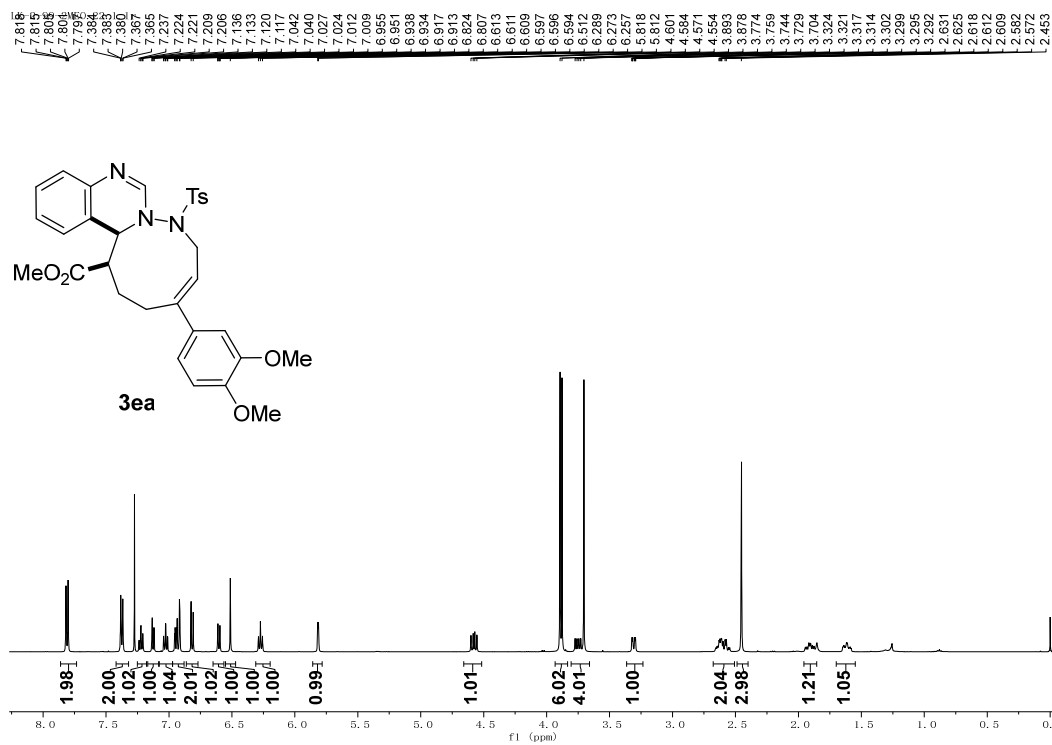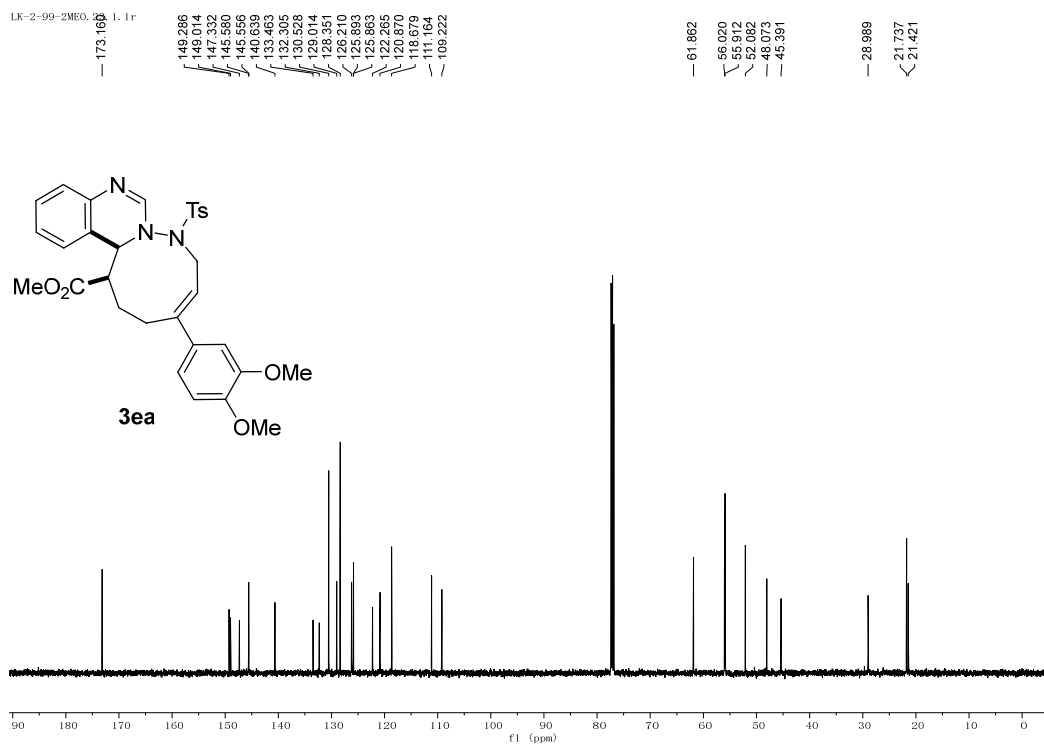

<sup>1</sup>H NMR (500 MHz) and <sup>13</sup>C NMR (125 MHz) spectra of 3ea

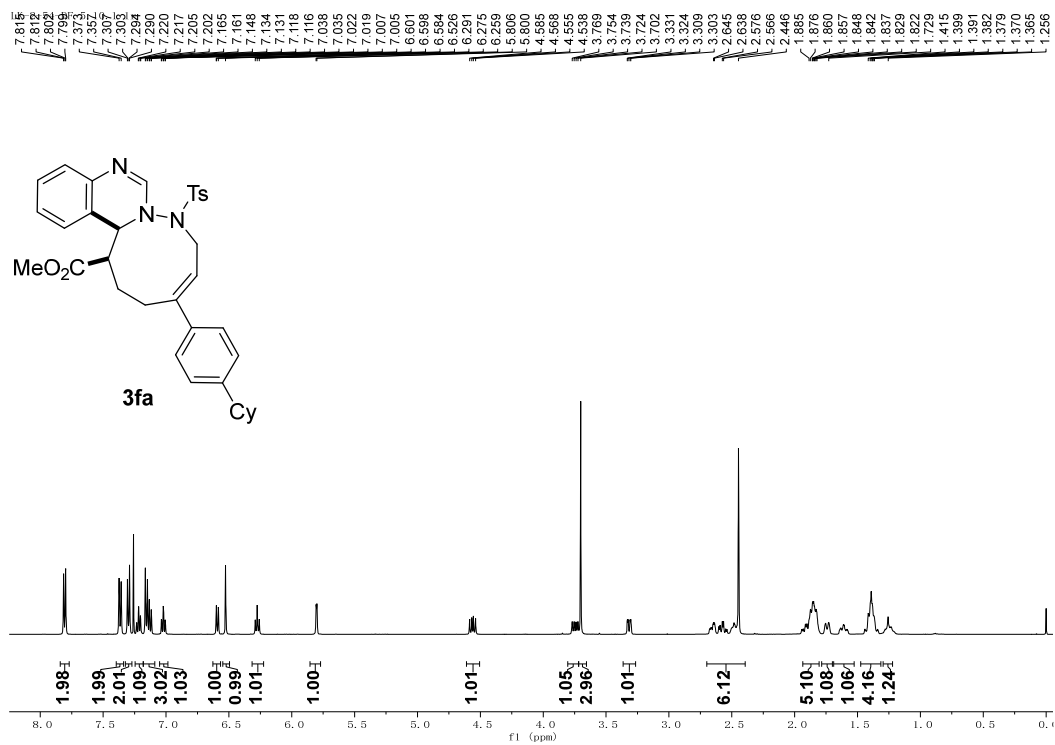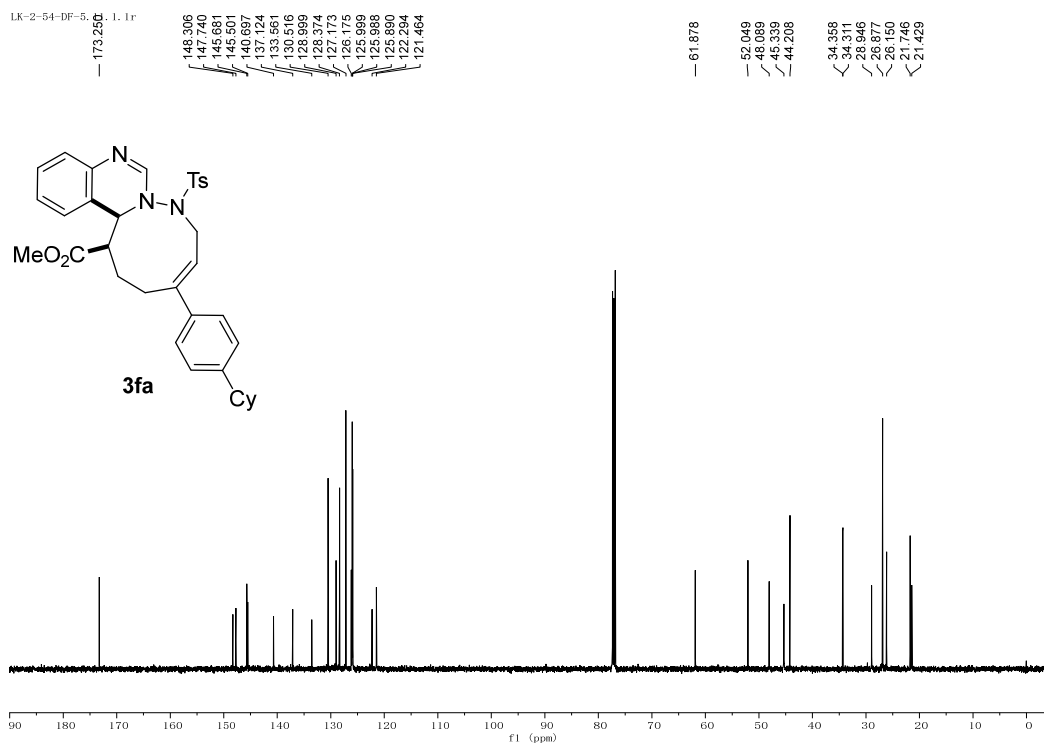

<sup>1</sup>H NMR (500 MHz) and <sup>13</sup>C NMR (125 MHz) spectra of **3fa**

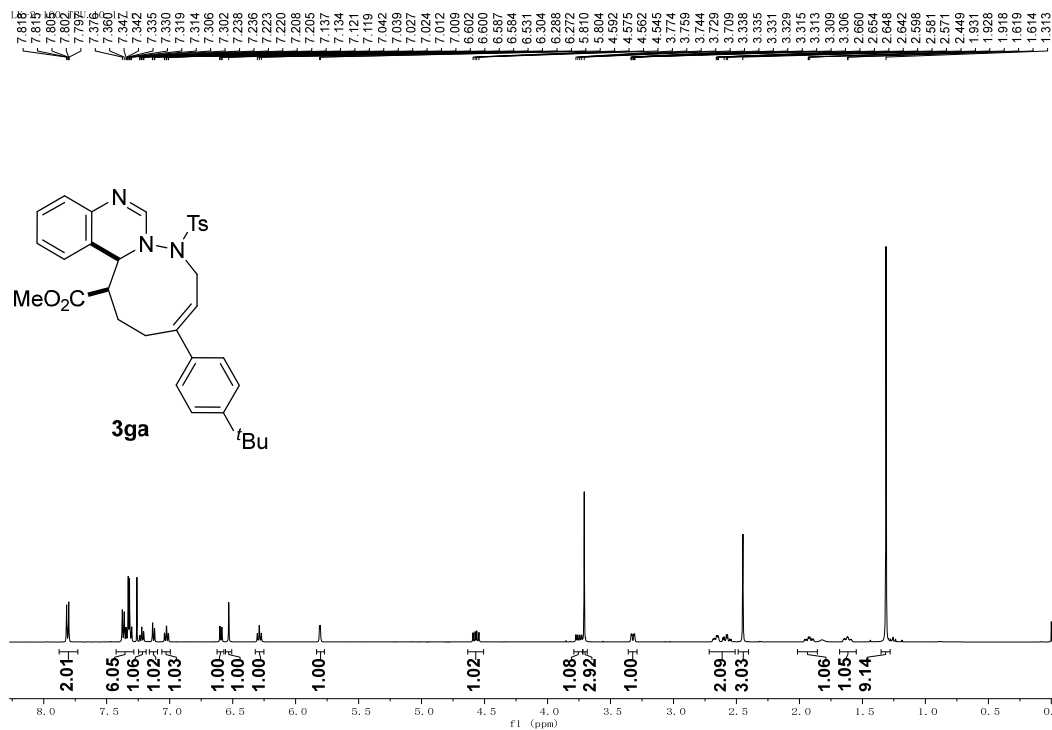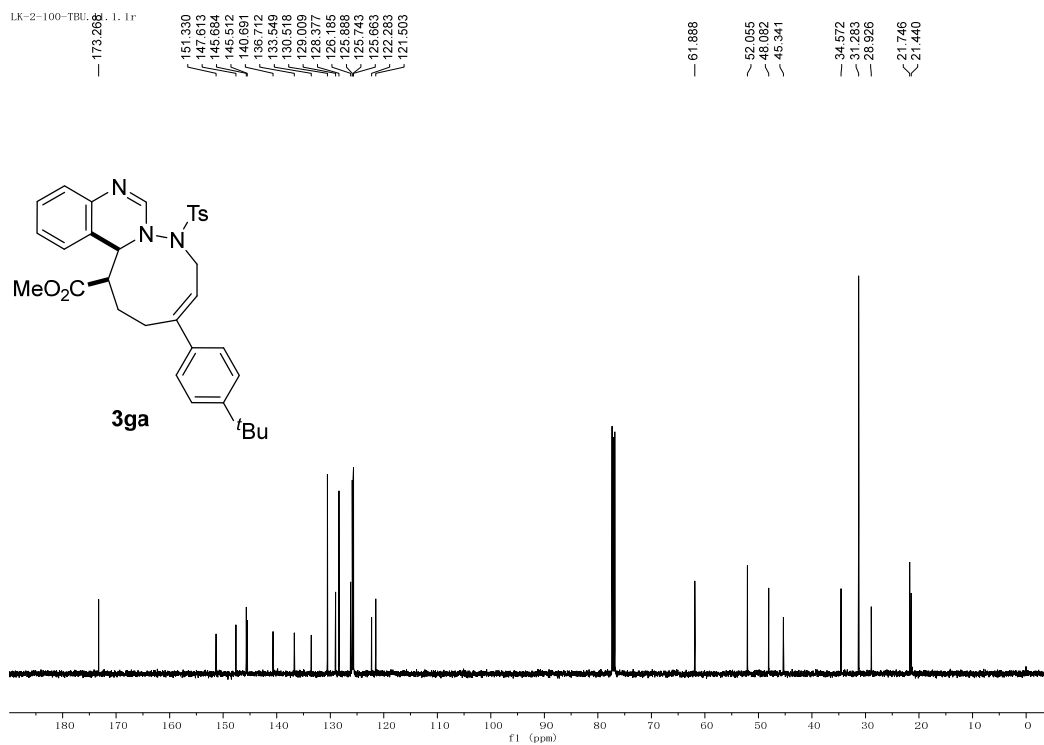

<sup>1</sup>H NMR (500 MHz) and <sup>13</sup>C NMR (125 MHz) spectra of **3ga**

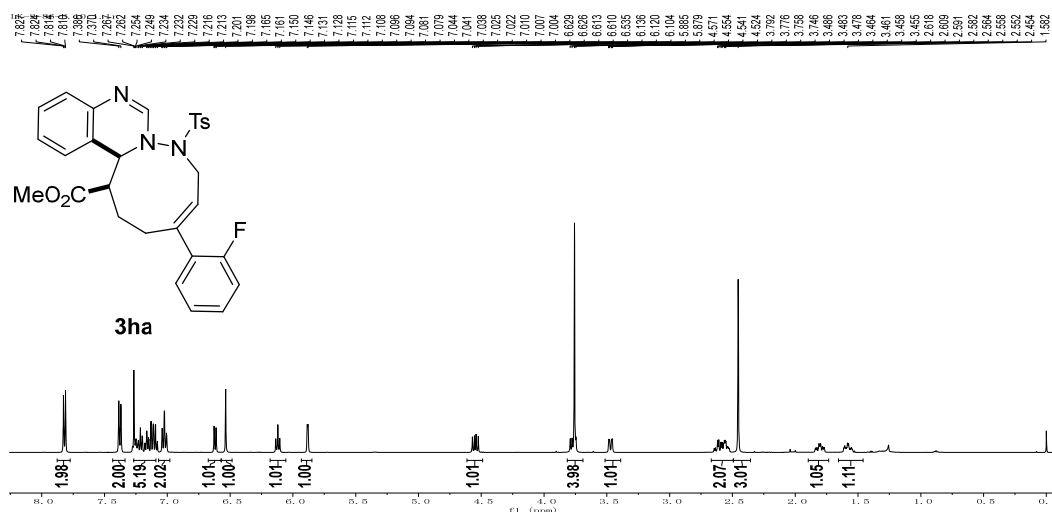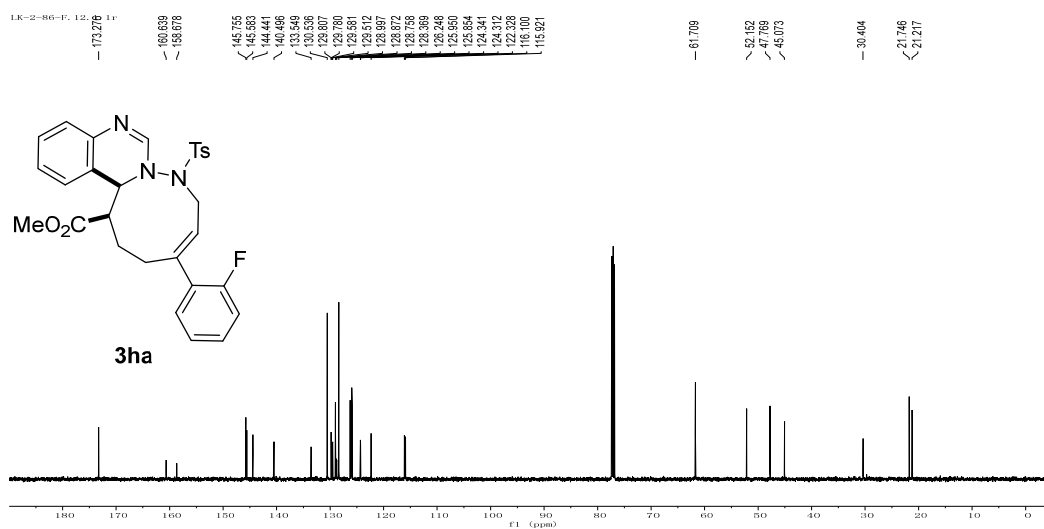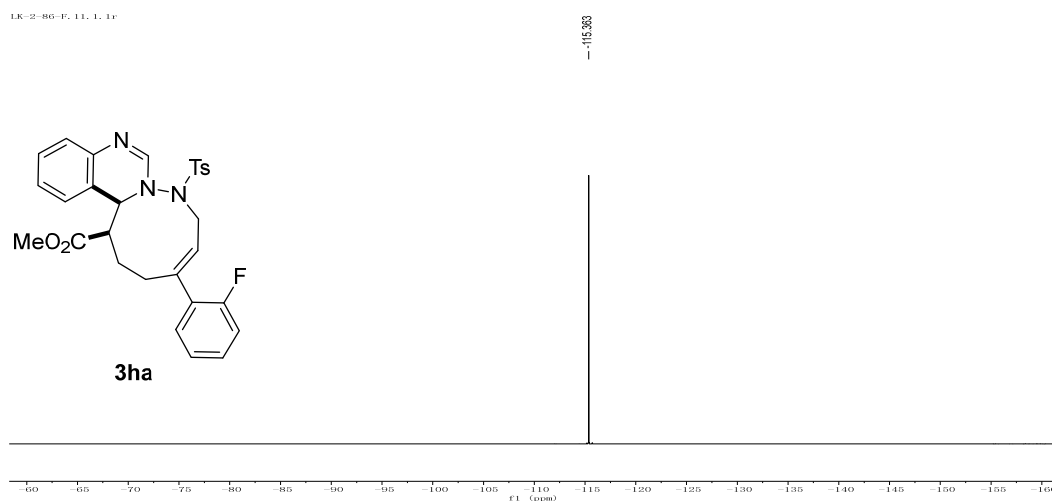

**<sup>1</sup>H NMR (500 MHz) <sup>13</sup>C NMR (125 MHz) and <sup>19</sup>F NMR (470 MHz) spectra of 3ha**



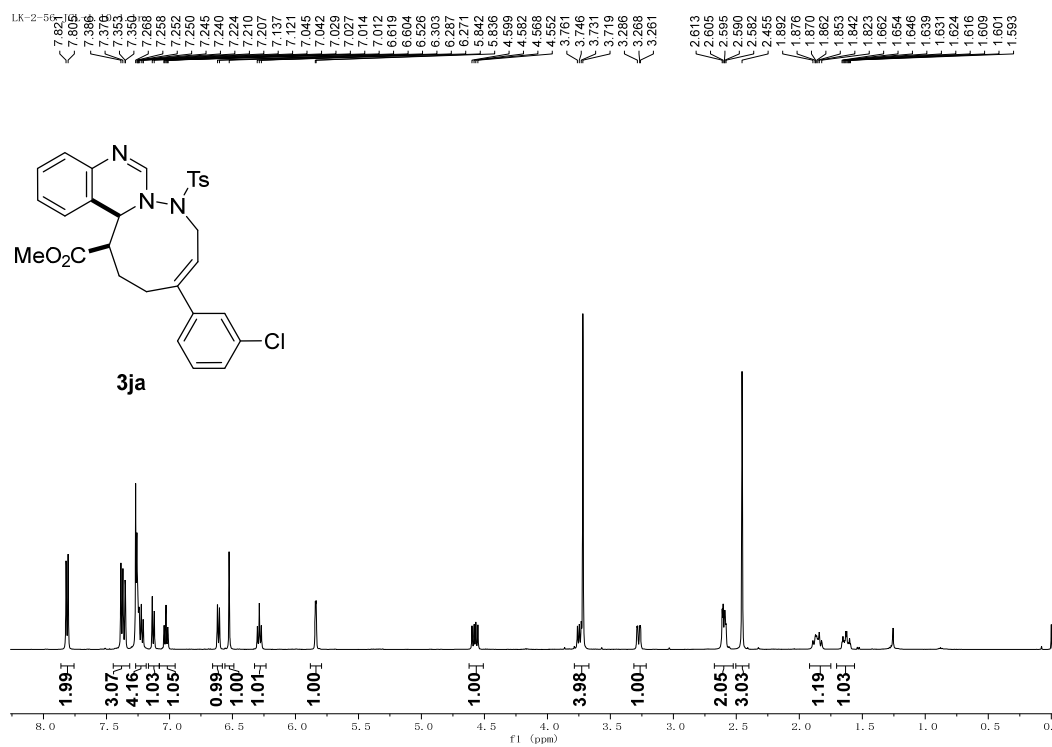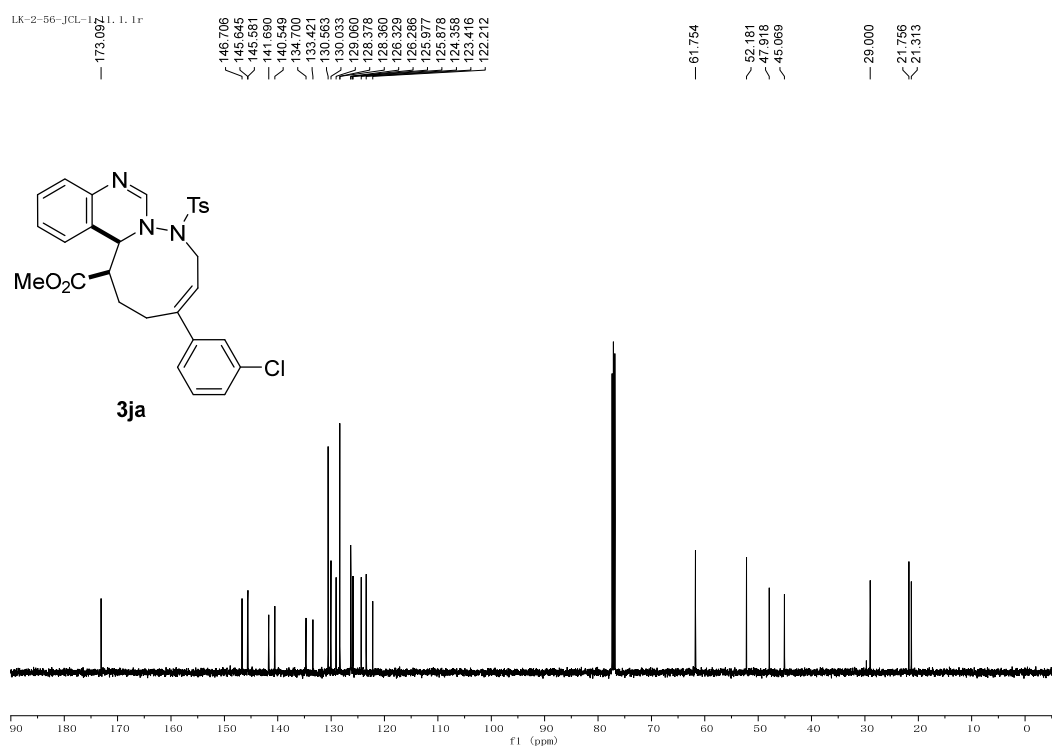

$^1\text{H}$  NMR (500 MHz) and  $^{13}\text{C}$  NMR (125 MHz) spectra of **3ja**

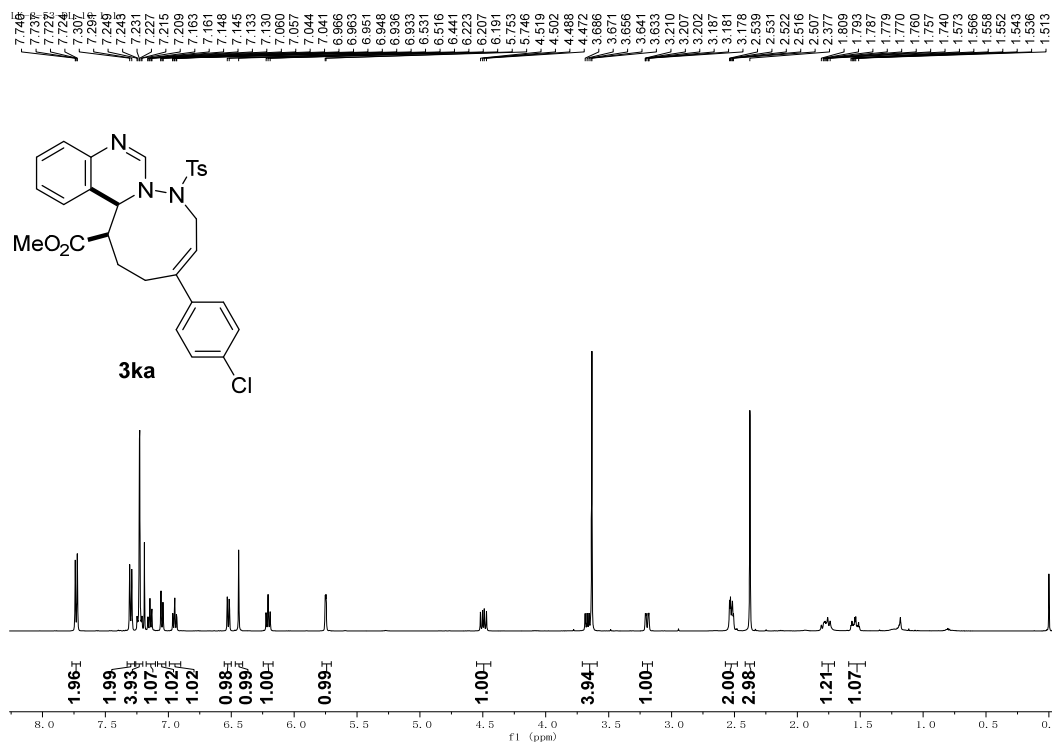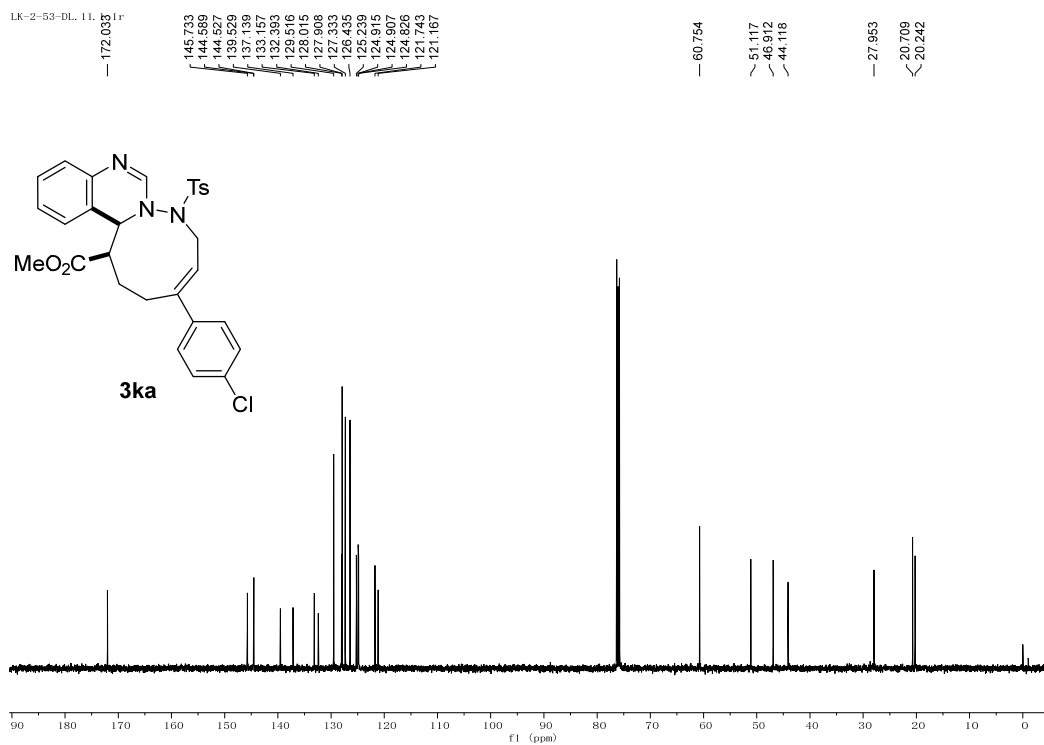

<sup>1</sup>H NMR (500 MHz) and <sup>13</sup>C NMR (125 MHz) spectra of **3ka**

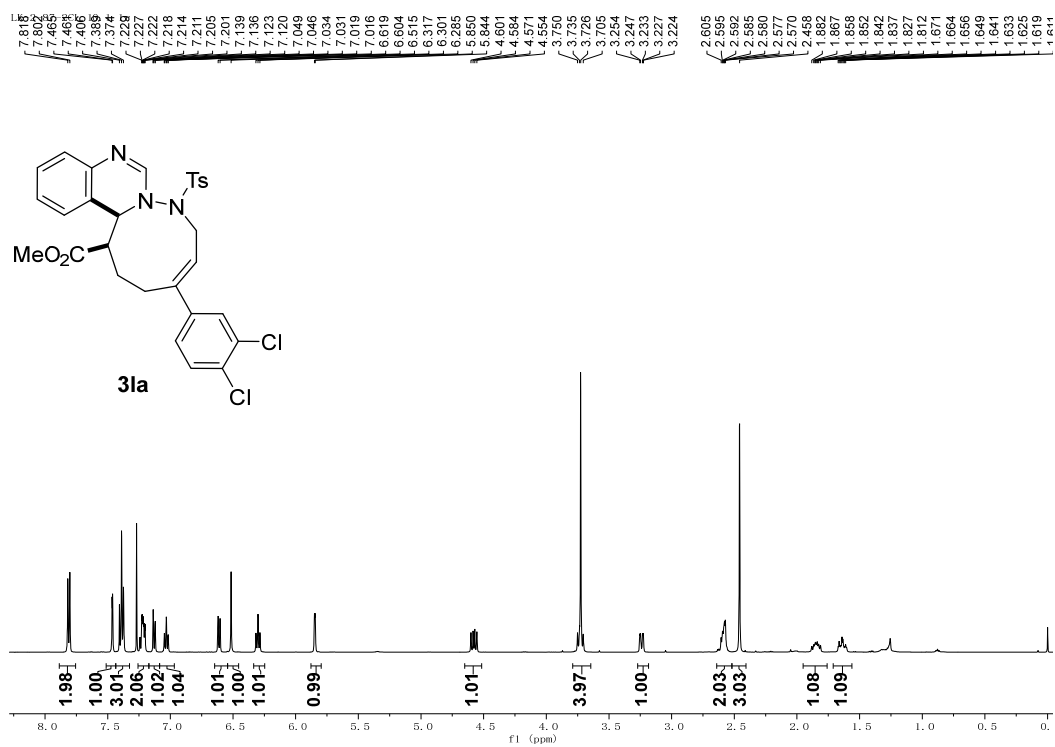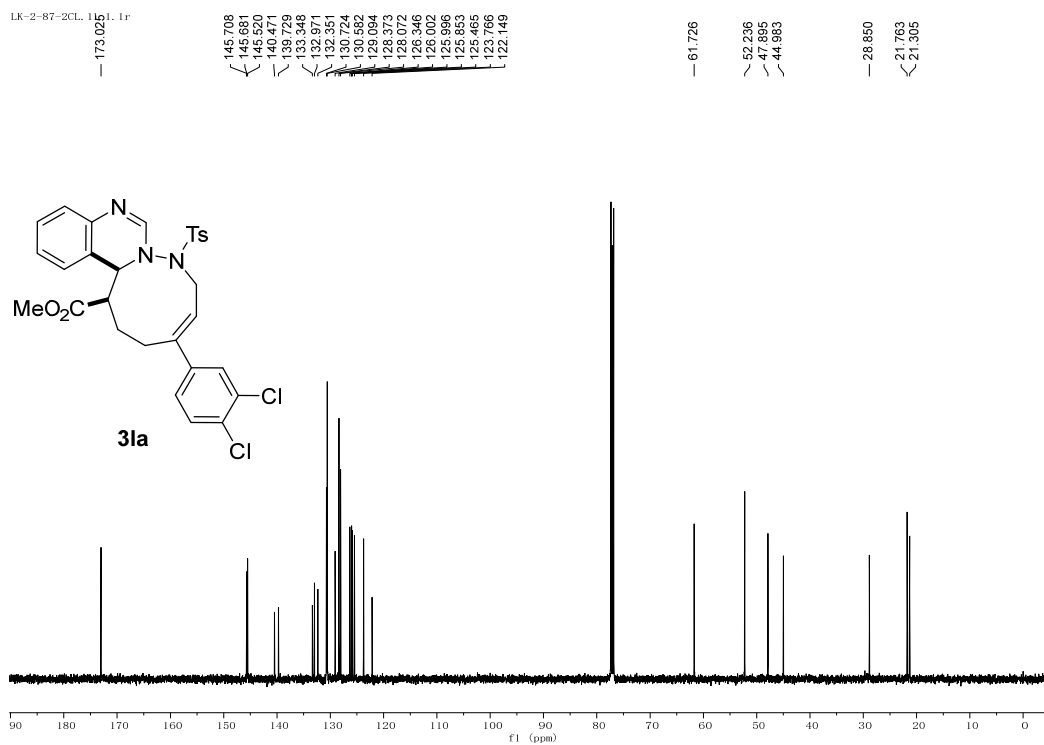

<sup>1</sup>H NMR (500 MHz) and <sup>13</sup>C NMR (125 MHz) spectra of **3la**

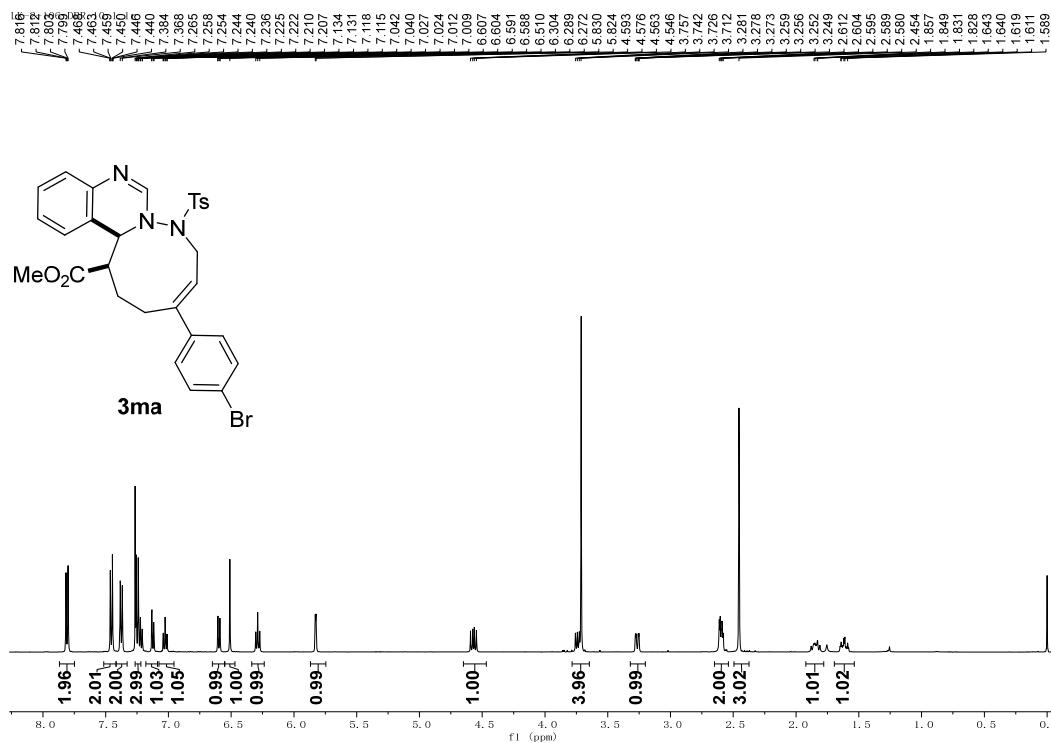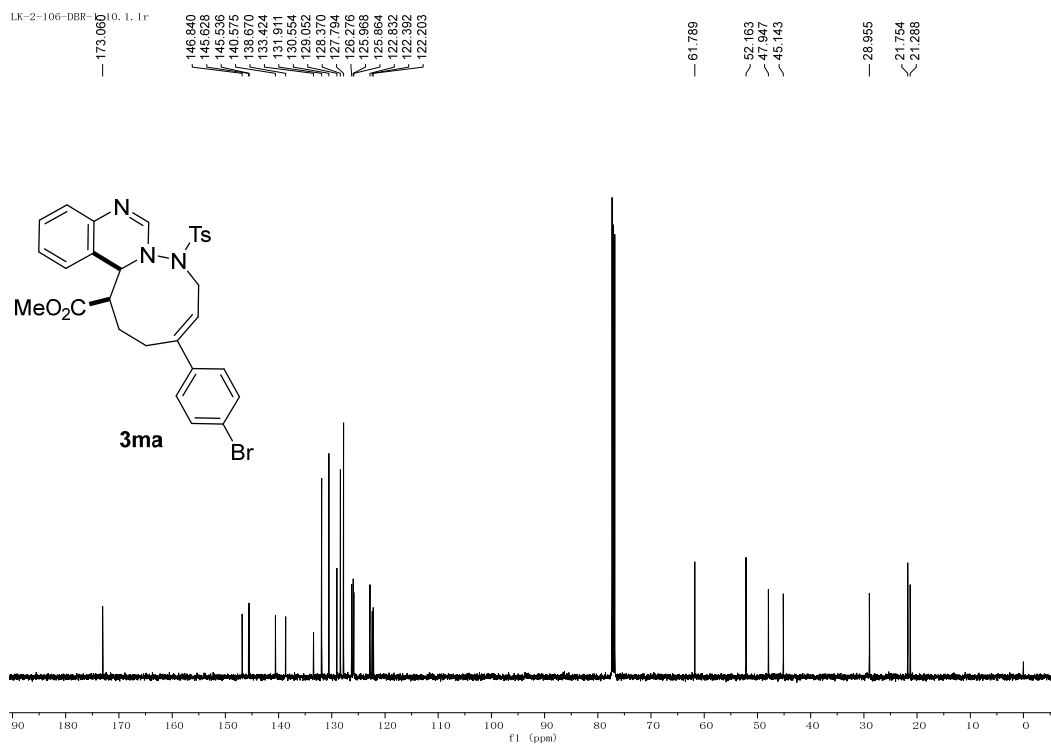

<sup>1</sup>H NMR (500 MHz) and <sup>13</sup>C NMR (125 MHz) spectra of **3ma**

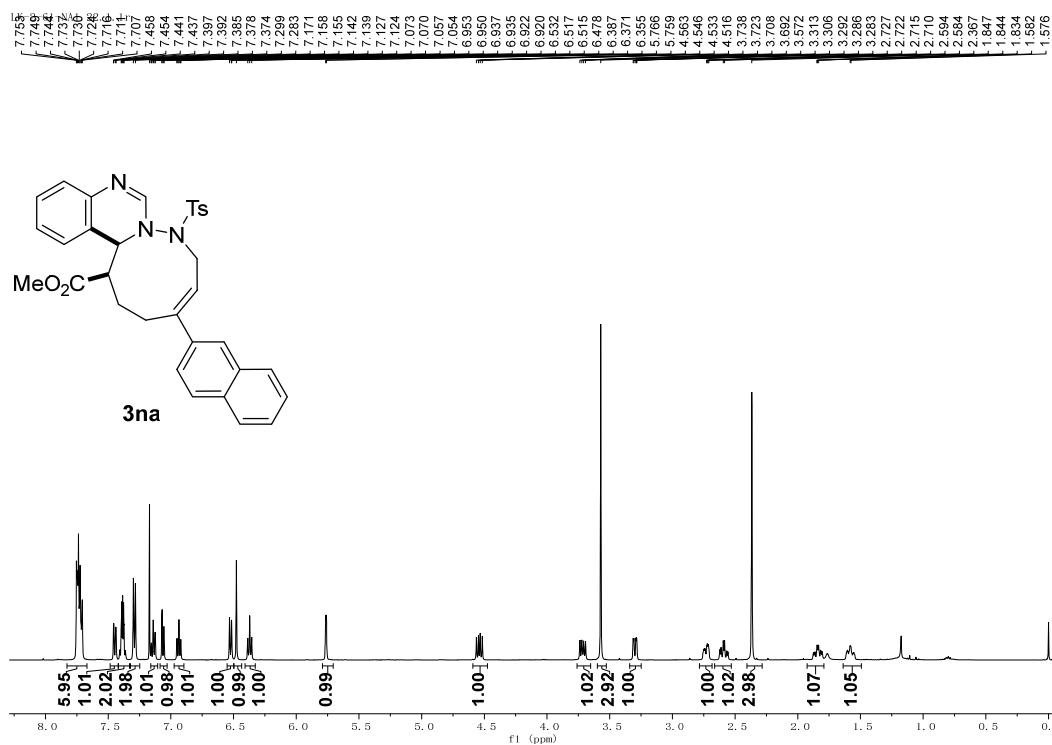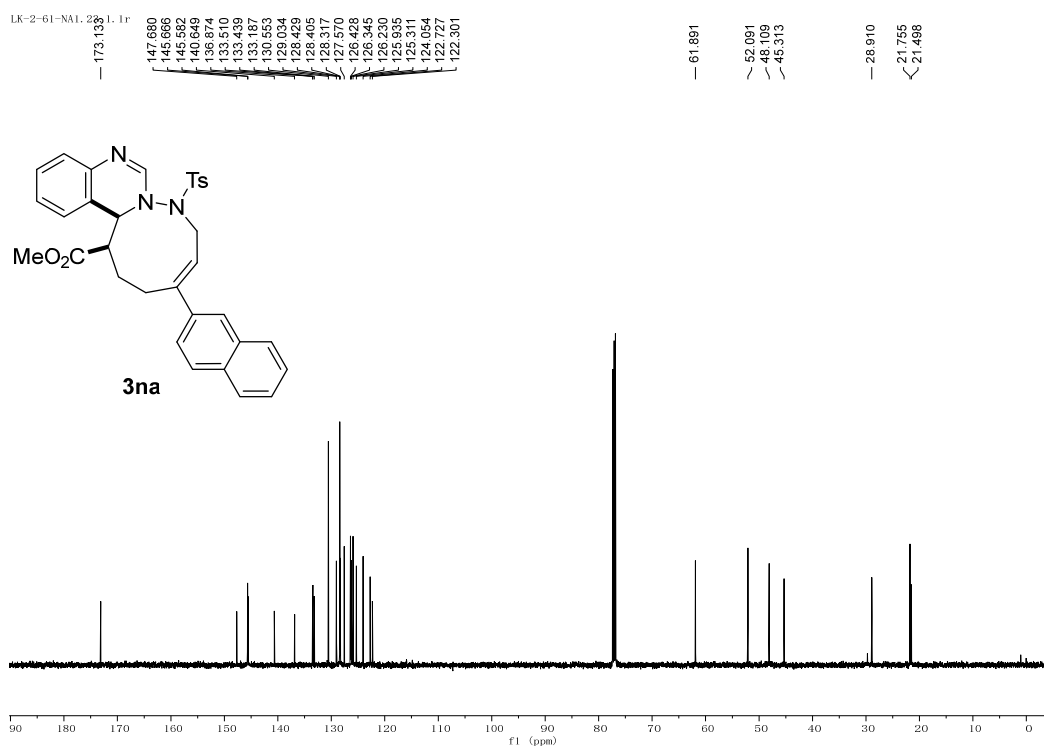

<sup>1</sup>H NMR (500 MHz) and <sup>13</sup>C NMR (125 MHz) spectra of **3na**



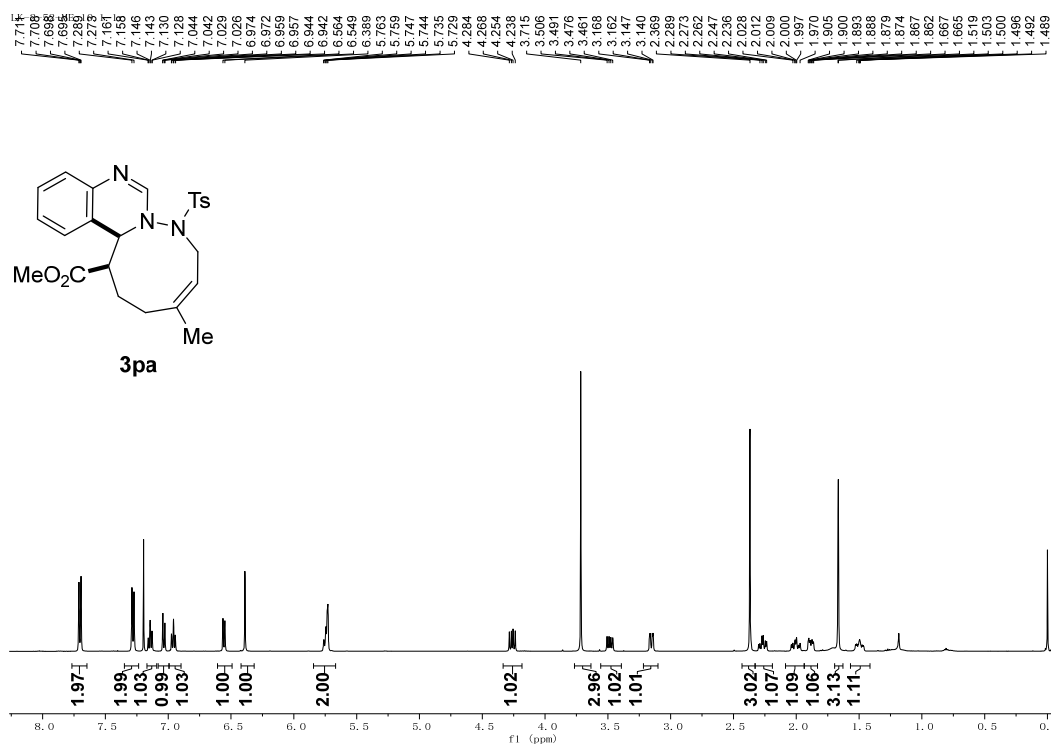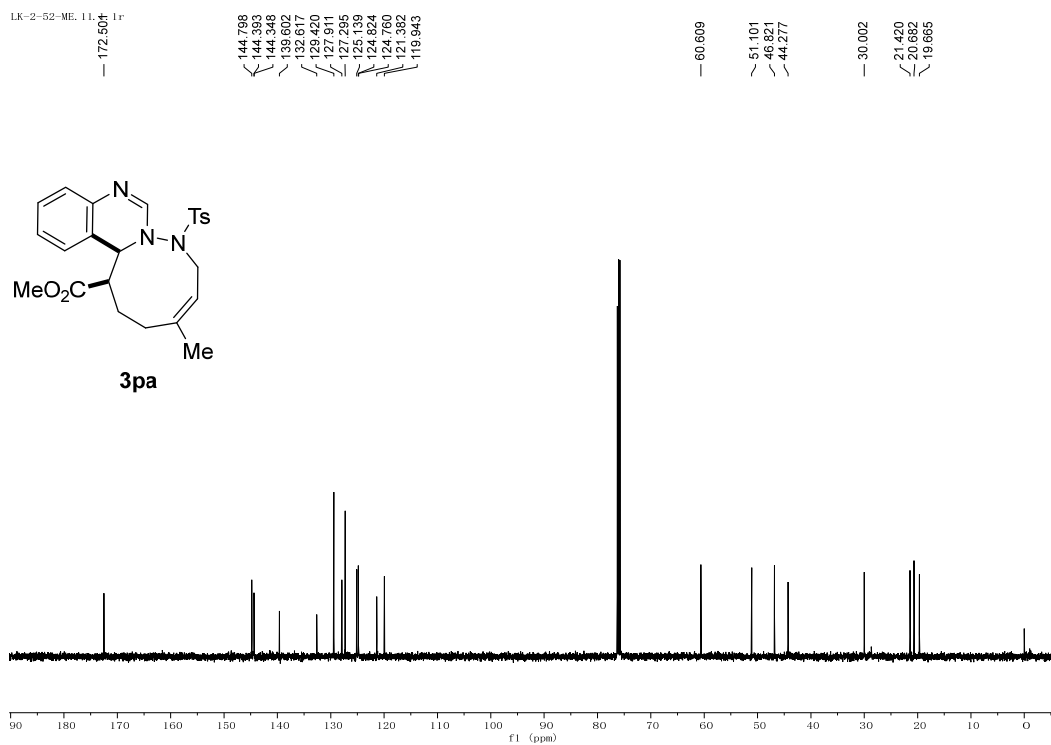

<sup>1</sup>H NMR (500 MHz) and <sup>13</sup>C NMR (125 MHz) spectra of **3pa**

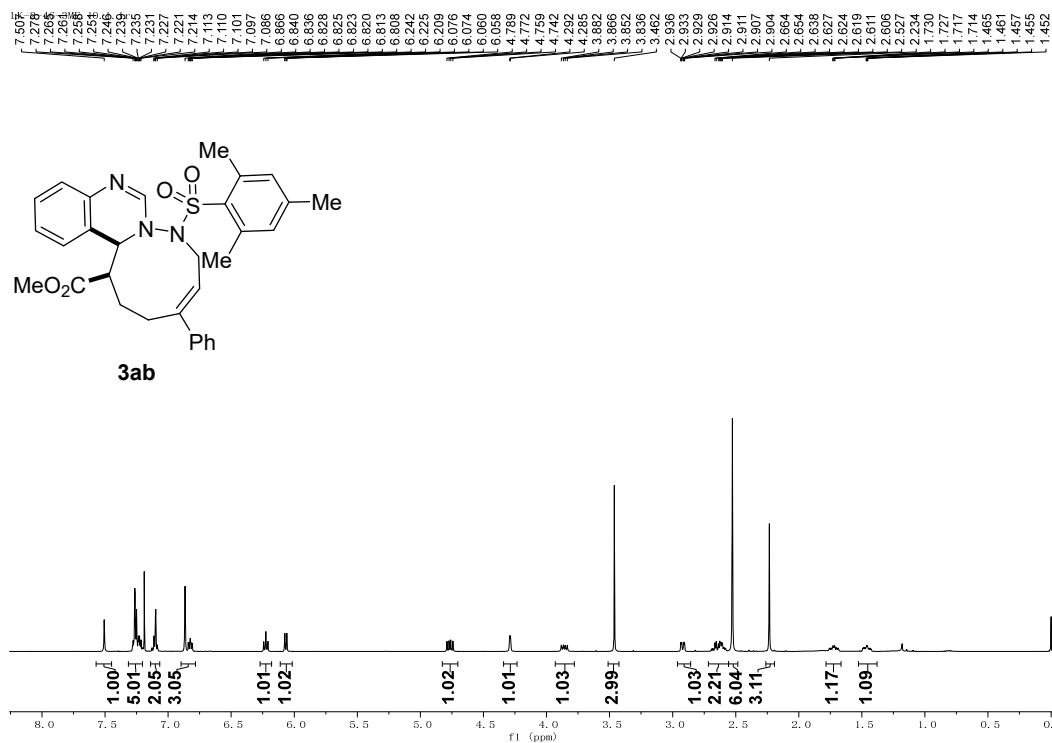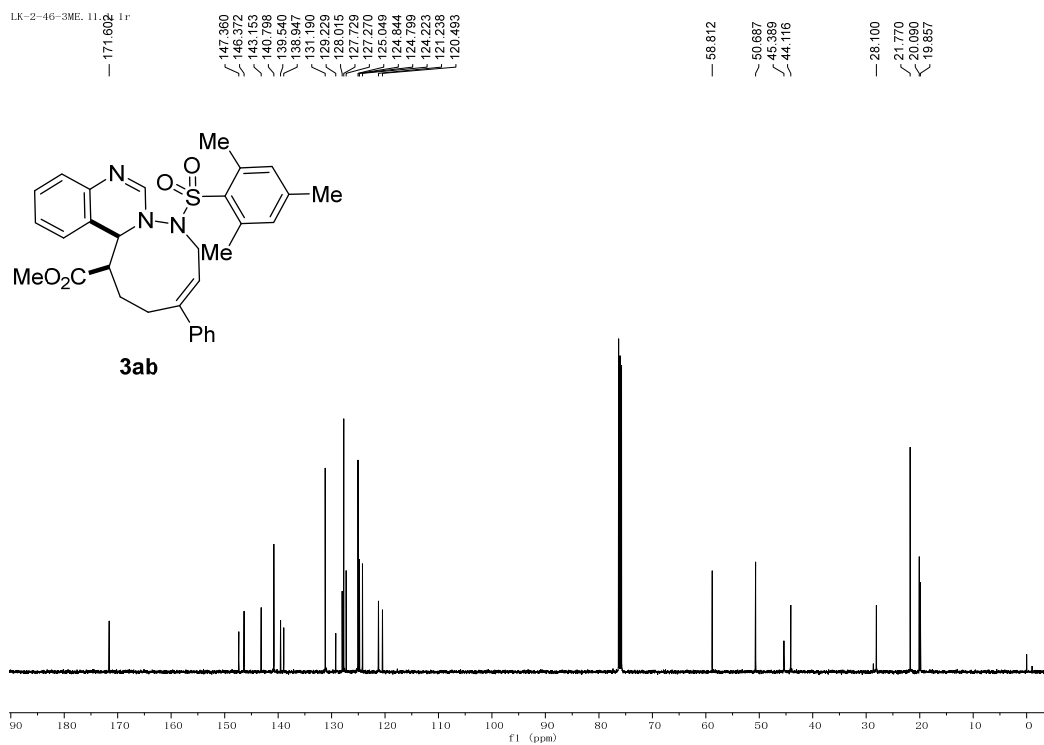

<sup>1</sup>H NMR (500 MHz) and <sup>13</sup>C NMR (125 MHz) spectra of **3ab**

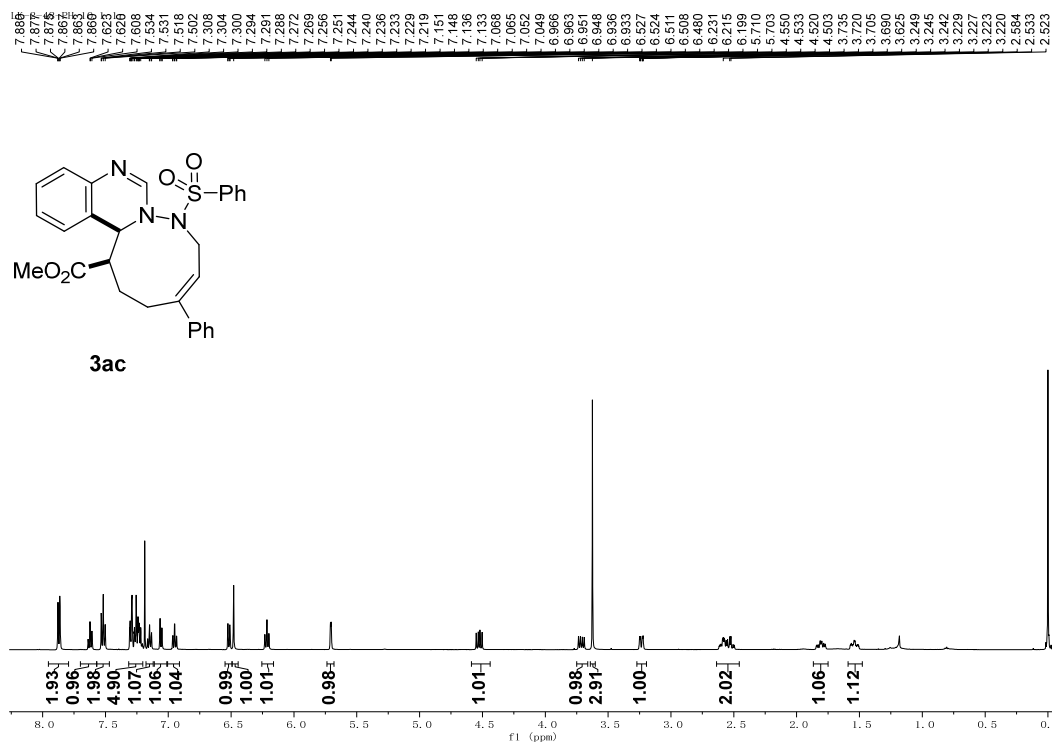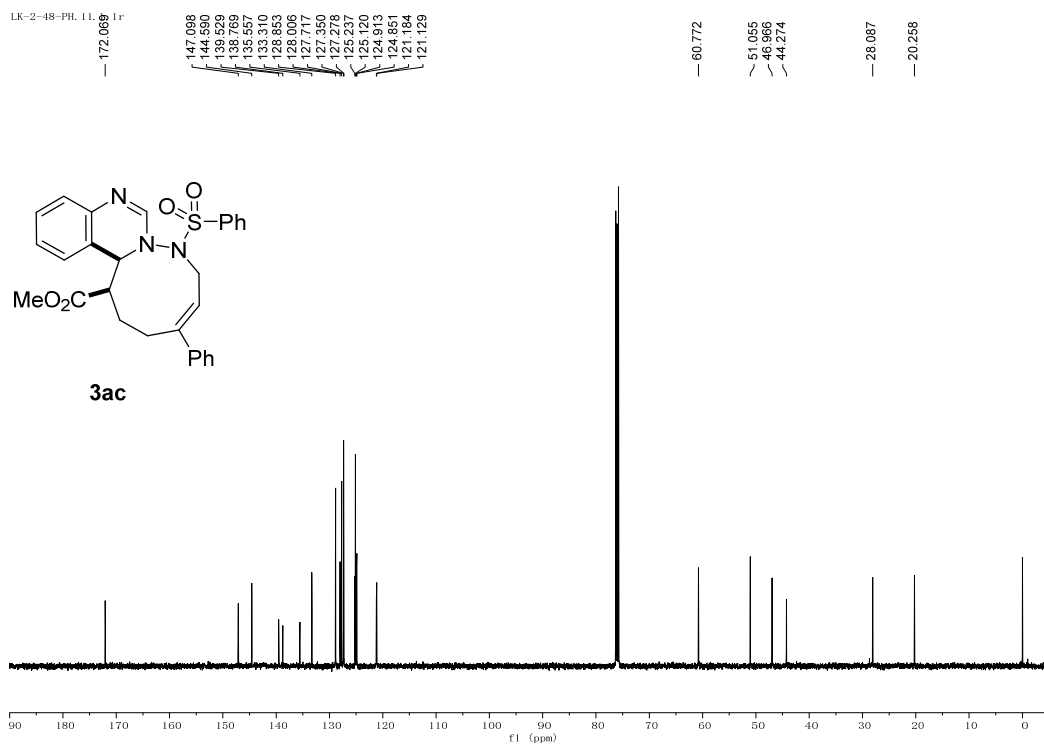

<sup>1</sup>H NMR (500 MHz) and <sup>13</sup>C NMR (125 MHz) spectra of **3ac**

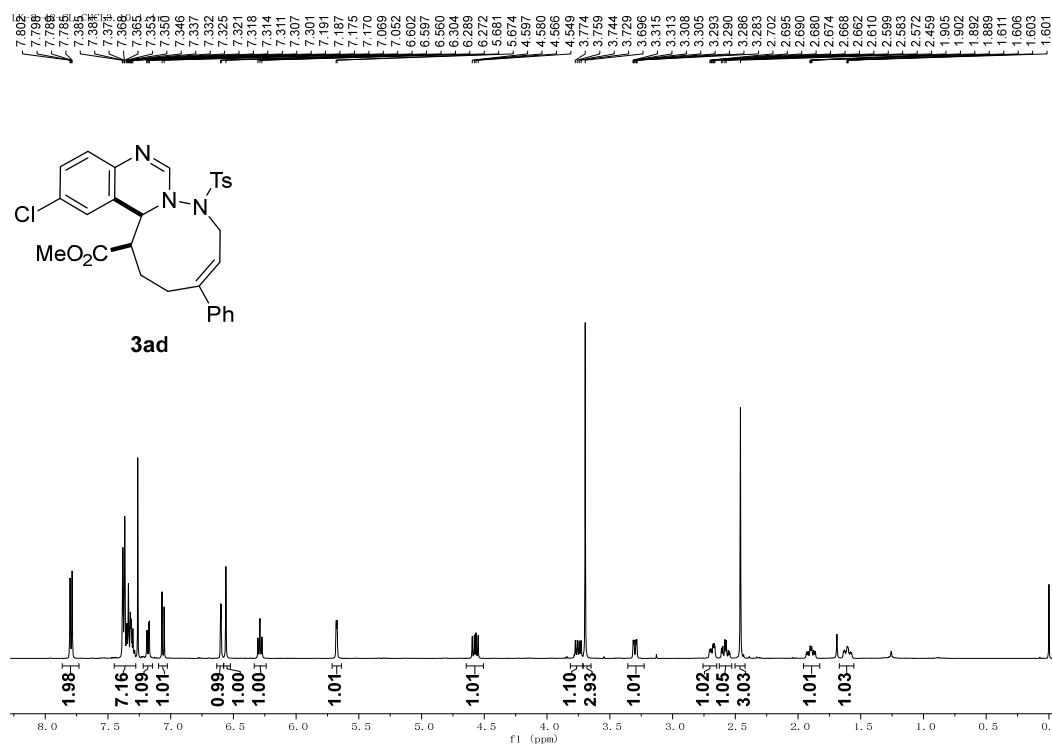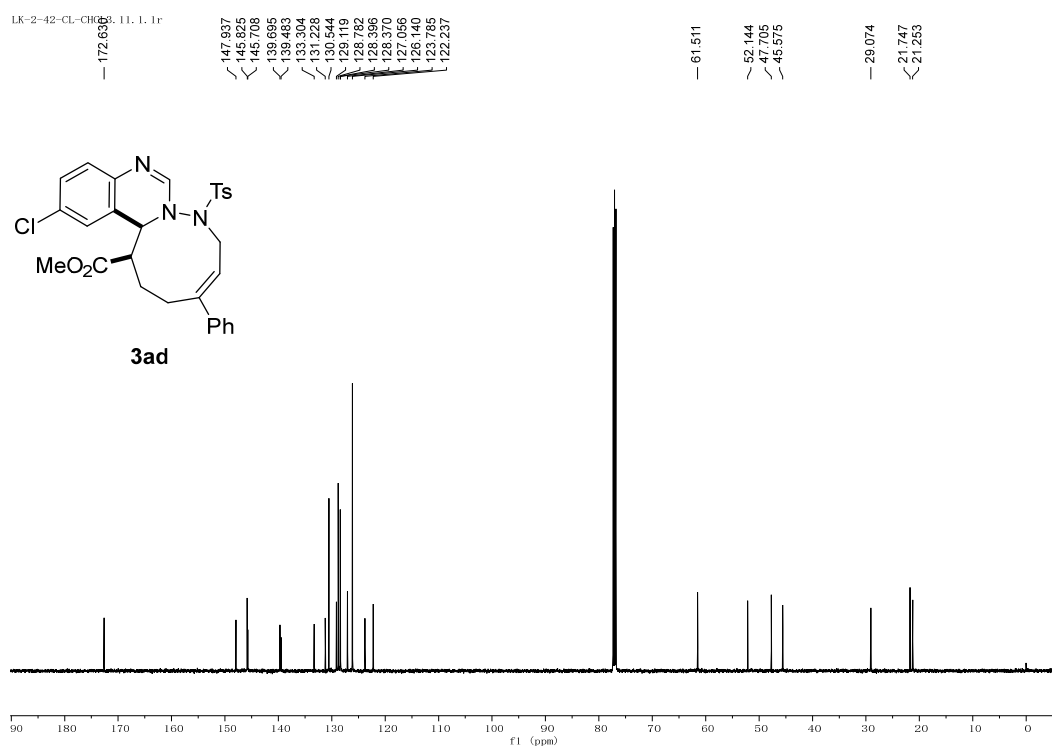

<sup>1</sup>H NMR (500 MHz) and <sup>13</sup>C NMR (125 MHz) spectra of **3ad**

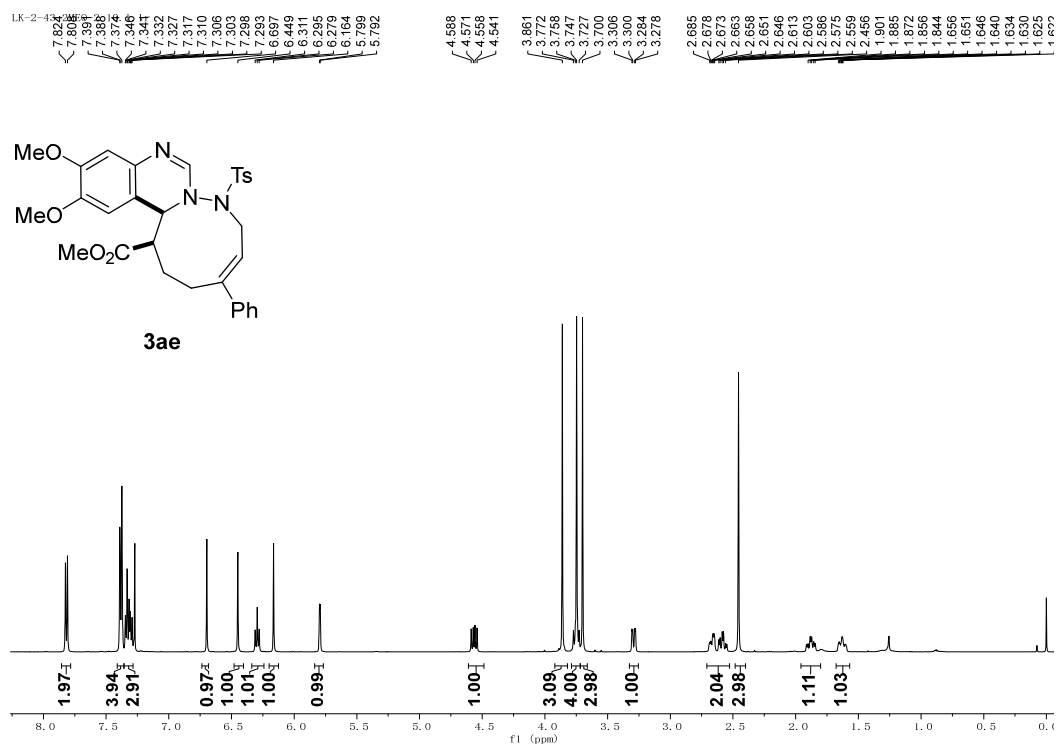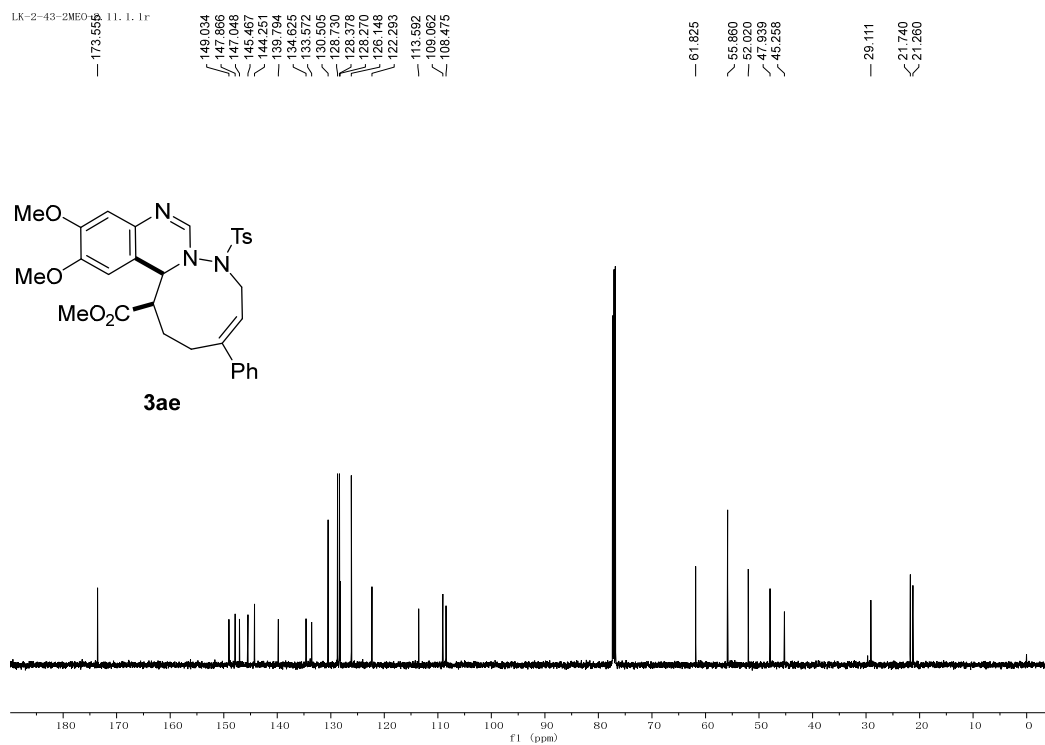

<sup>1</sup>H NMR (500 MHz) and <sup>13</sup>C NMR (125 MHz) spectra of **3ae**

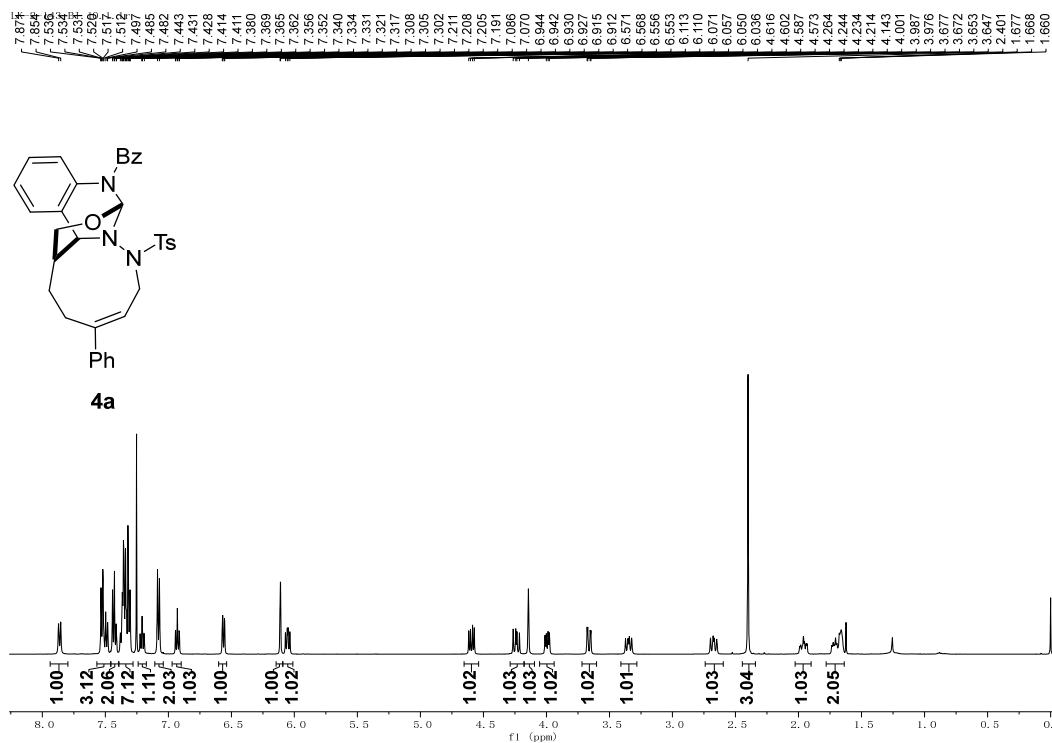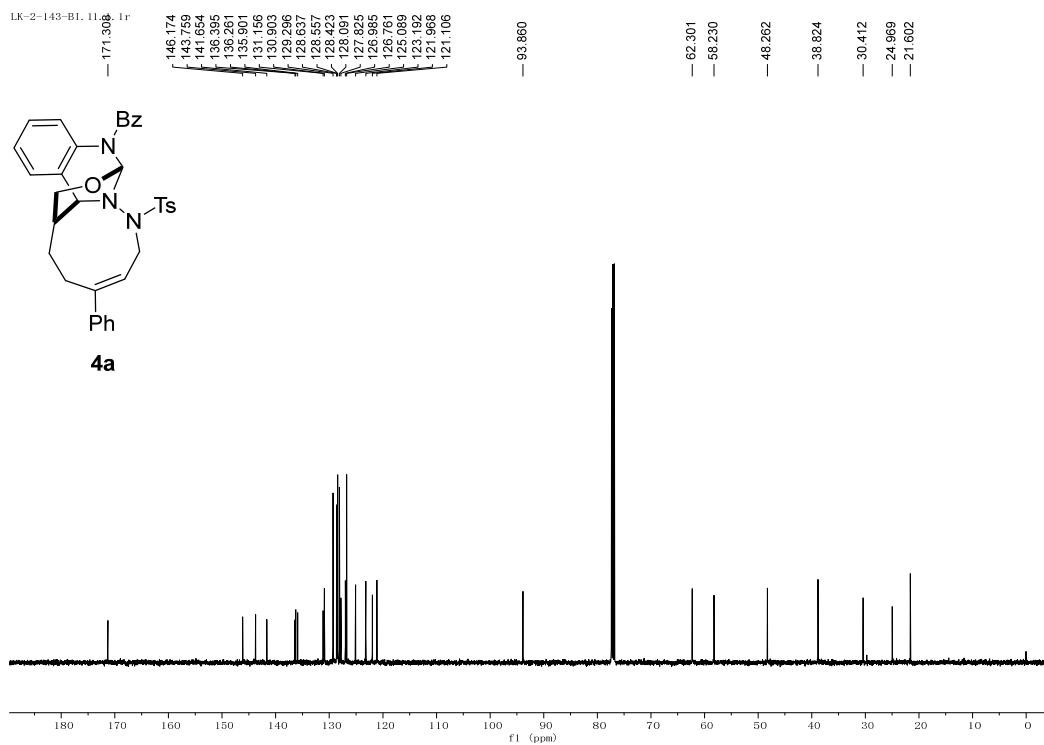

<sup>1</sup>H NMR (500 MHz) and <sup>13</sup>C NMR (125 MHz) spectra of **4a**

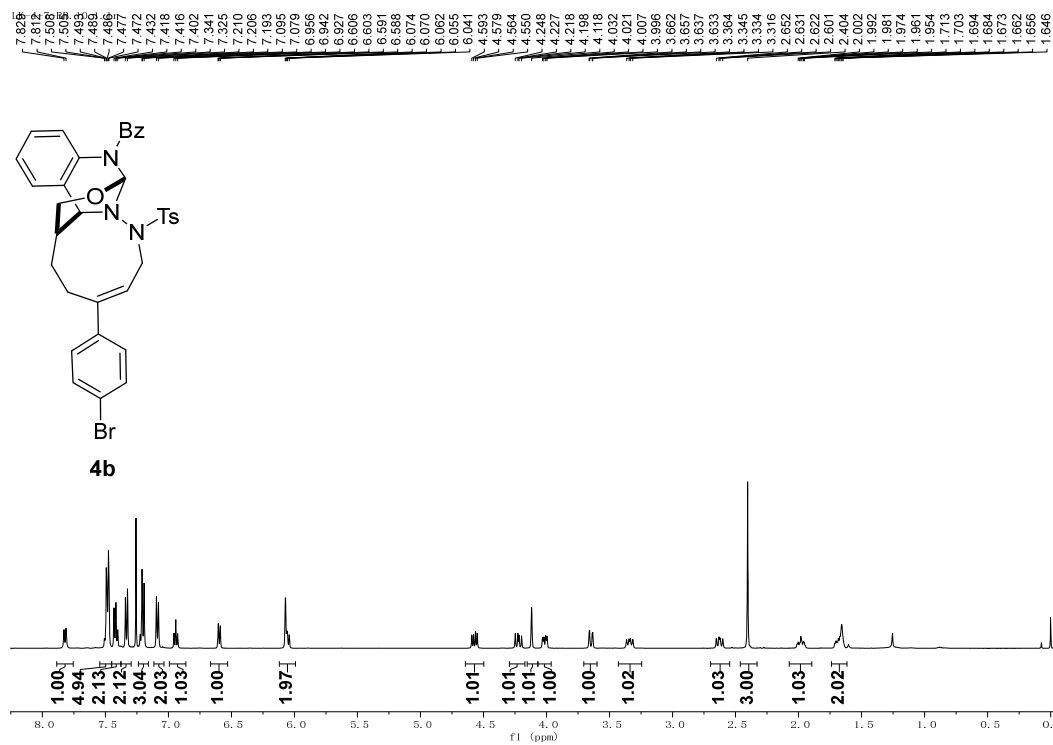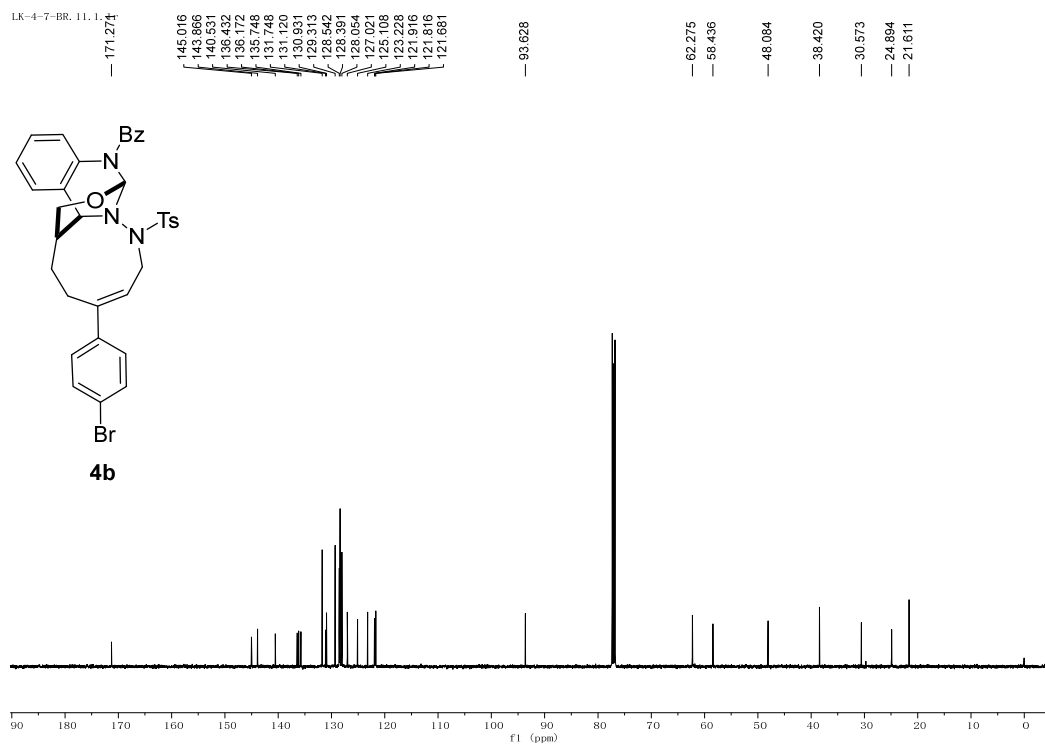

<sup>1</sup>H NMR (500 MHz) and <sup>13</sup>C NMR (125 MHz) spectra of **4b**

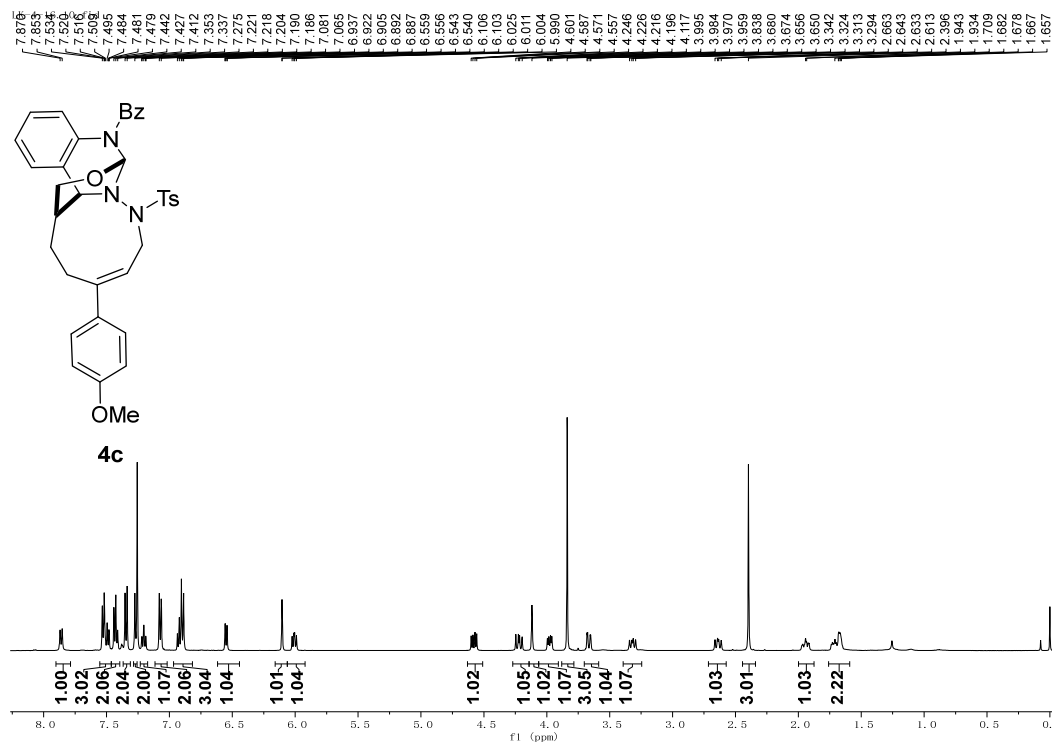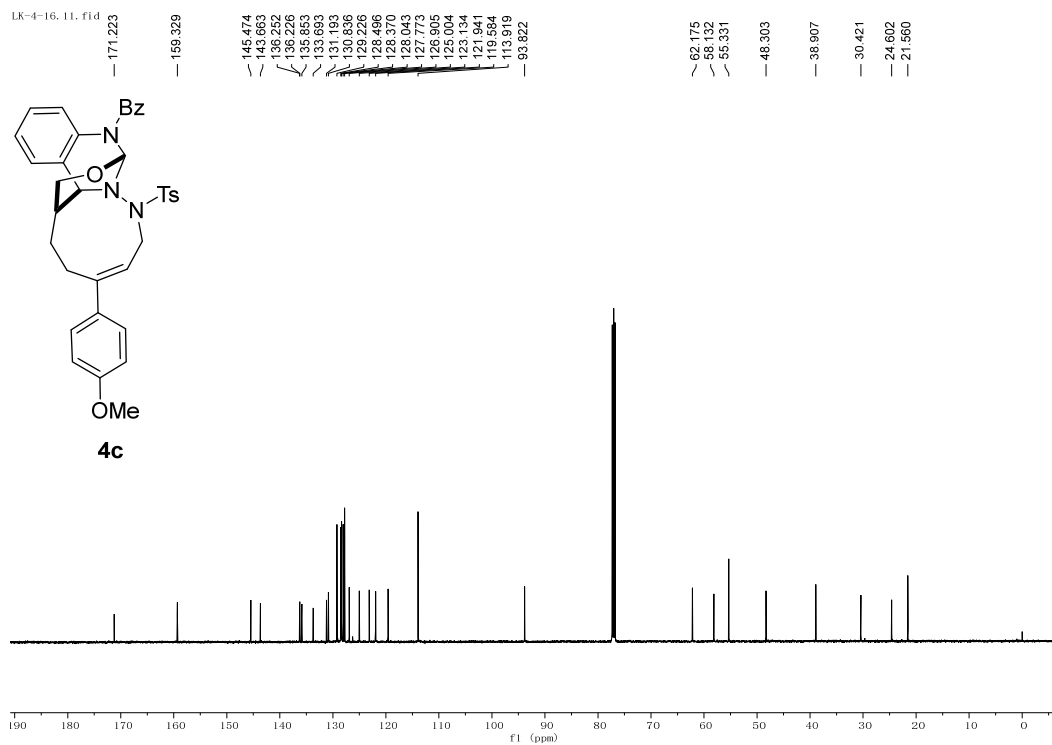

<sup>1</sup>H NMR (500 MHz) and <sup>13</sup>C NMR (125 MHz) spectra of **4c**

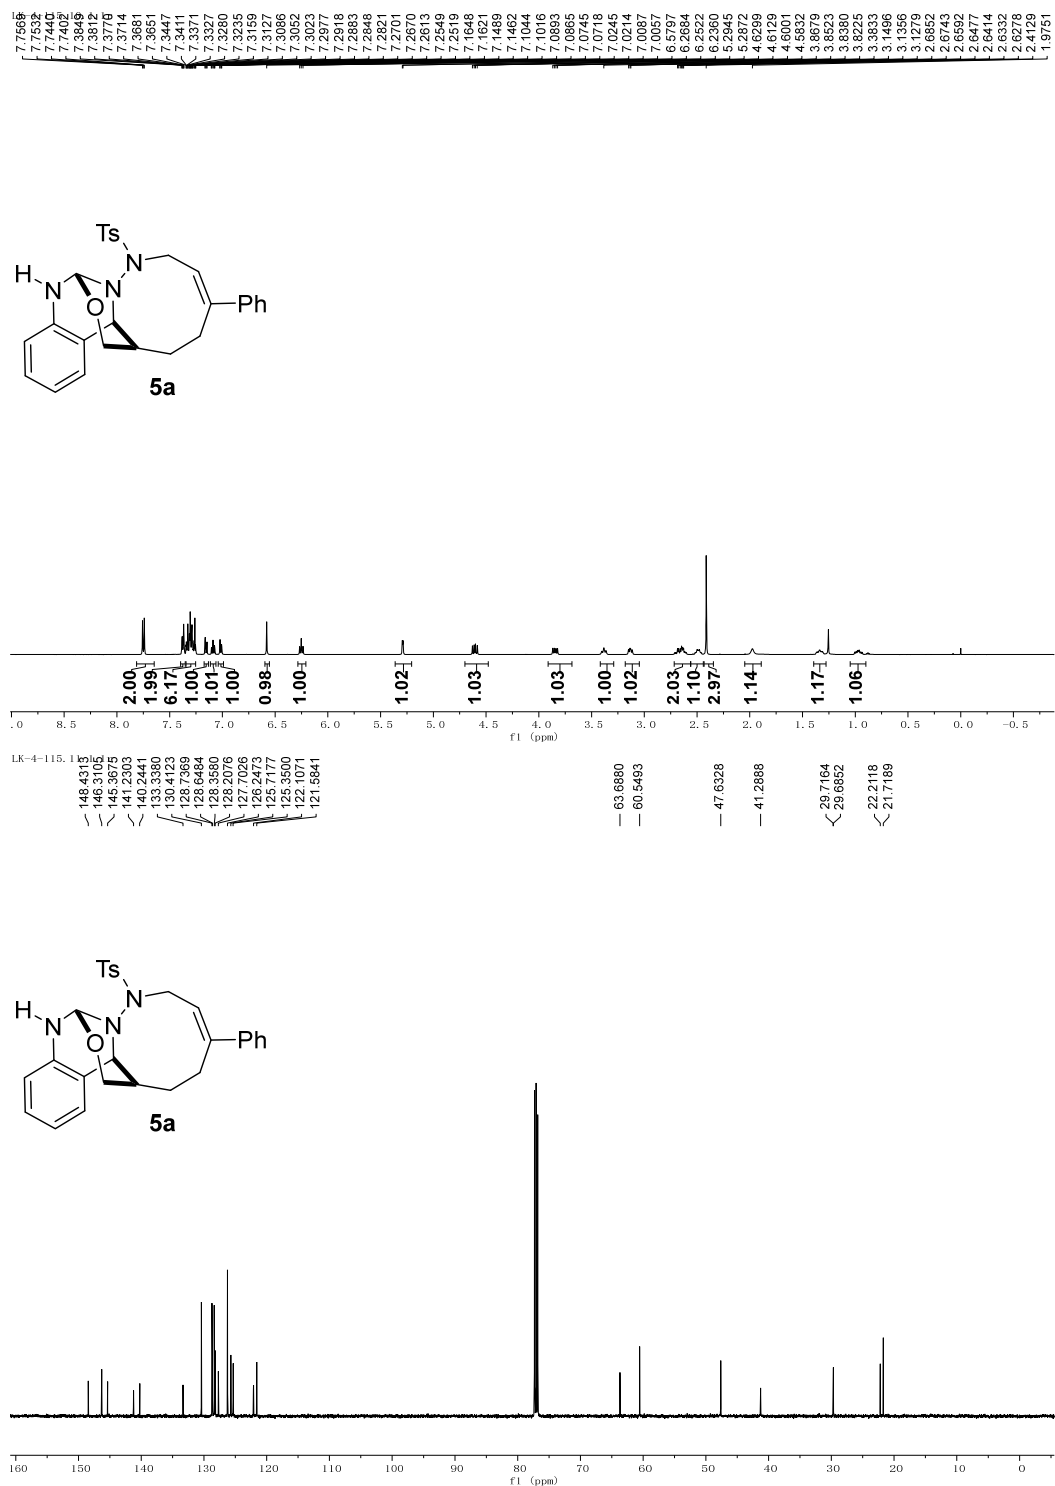

<sup>1</sup>H NMR (500 MHz) and <sup>13</sup>C NMR (125 MHz) spectra of **5a**

## X-ray Crystal data of 3aa and 4a

X-Ray Crystallography Data Crystallographic data for the compound **3aa** has been deposited with the Cambridge Crystallographic Data Centre as deposition number CCDC 2120713. These data can be obtained free of charge via [www.ccdc.cam.ac.uk/data\\_request/cif](http://www.ccdc.cam.ac.uk/data_request/cif), or by emailing [data\\_request@ccdc.cam.ac.uk](mailto:data_request@ccdc.cam.ac.uk), or by contacting The Cambridge Crystallographic Data Centre, 12, Union Road, Cambridge CB2 1EZ, UK; fax: +44 1223 336033.

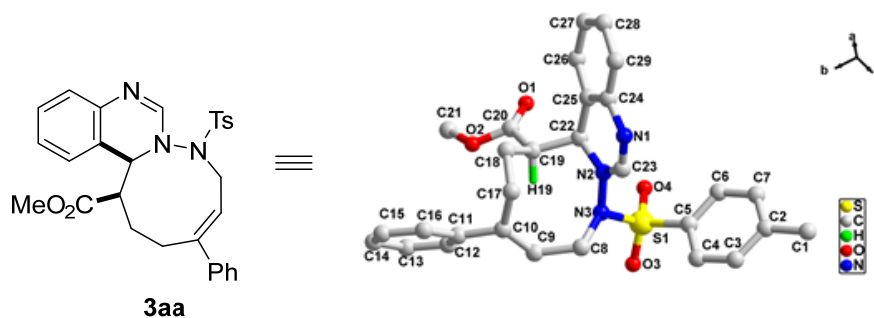

**Table S1. Crystal data and structure refinement for 3aa**

|                       |                                                                 |
|-----------------------|-----------------------------------------------------------------|
| Identification code   | <b>3aa</b>                                                      |
| Empirical formula     | C <sub>29</sub> H <sub>29</sub> N <sub>3</sub> O <sub>4</sub> S |
| Formula weight        | 515.61                                                          |
| Temperature/K         | 281.0                                                           |
| Crystal system        | triclinic                                                       |
| Space group           | P-1                                                             |
| a/Å                   | 10.4935(6)                                                      |
| b/Å                   | 11.0890(5)                                                      |
| c/Å                   | 12.2484(6)                                                      |
| α/°                   | 103.579(2)                                                      |
| β/°                   | 101.602(2)                                                      |
| γ/°                   | 97.418(2)                                                       |
| Volume/Å <sup>3</sup> | 1333.63(12)                                                     |
| Z                     | 2                                                               |

|                                                       |                                                                    |
|-------------------------------------------------------|--------------------------------------------------------------------|
| $\rho_{\text{calc}}/\text{cm}^3$                      | 1.284                                                              |
| $\mu/\text{mm}^{-1}$                                  | 0.161                                                              |
| $F(000)$                                              | 544.0                                                              |
| Crystal size/ $\text{mm}^3$                           |                                                                    |
| Radiation                                             | MoK $\alpha$ ( $\lambda = 0.71073$ )                               |
| $2\theta$ range for data collection/ $^\circ$         | 6.106 to 55.048                                                    |
| Index ranges                                          | $-13 \leq h \leq 13$ , $-14 \leq k \leq 14$ , $-15 \leq l \leq 15$ |
| Reflections collected                                 | 33997                                                              |
| Independent reflections                               | 6117 [ $R_{\text{int}} = 0.0503$ , $R_{\text{sigma}} = 0.0331$ ]   |
| Data/restraints/parameters                            | 6117/300/336                                                       |
| Goodness-of-fit on $F^2$                              | 1.020                                                              |
| Final R indexes [ $I \geq 2\sigma(I)$ ]               | $R1 = 0.0457$ , $wR2 = 0.1077$                                     |
| Final R indexes [all data]                            | $R1 = 0.0692$ , $wR2 = 0.1208$                                     |
| Largest diff. peak/hole / $\text{e } \text{\AA}^{-3}$ | 0.33/-0.33                                                         |

X-Ray Crystallography Data Crystallographic data for the compound **4a** has been deposited with the Cambridge Crystallographic Data Centre as deposition number CCDC 2145461. These data can be obtained free of charge via [www.ccdc.cam.ac.uk/data\\_request/cif](http://www.ccdc.cam.ac.uk/data_request/cif), or by emailing [data\\_request@ccdc.cam.ac.uk](mailto:data_request@ccdc.cam.ac.uk), or by contacting The Cambridge Crystallographic Data Centre, 12, Union Road, Cambridge CB2 1EZ, UK; fax: +44 1223 336033.

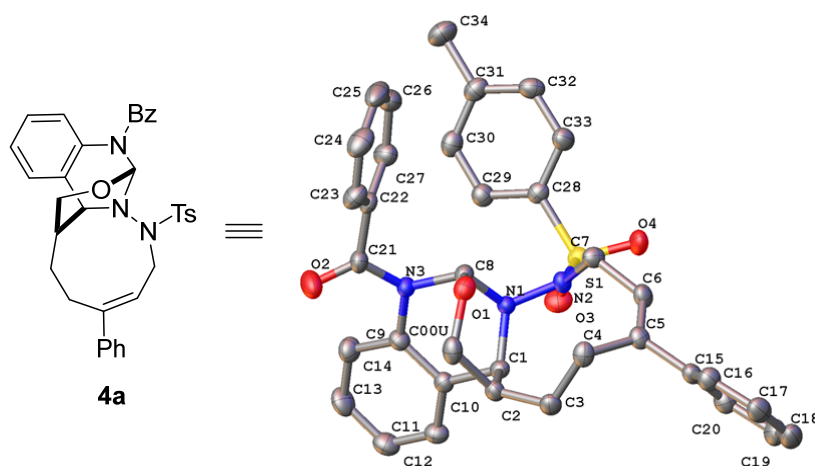

**Table S2. Crystal data and structure refinement for 4a.**

|                                   |                                                                                                                |
|-----------------------------------|----------------------------------------------------------------------------------------------------------------|
| Identification code               | <b>4a</b>                                                                                                      |
| Empirical formula                 | C <sub>35</sub> H <sub>33</sub> N <sub>3</sub> O <sub>4</sub> S                                                |
| Formula weight                    | 591.70                                                                                                         |
| Temperature                       | 296.15 K                                                                                                       |
| Wavelength                        | 0.71073 Å                                                                                                      |
| Crystal system                    | Triclinic                                                                                                      |
| Space group                       | P-1                                                                                                            |
| Unit cell dimensions              | a = 9.6278(17) Å    α = 105.423(3)°<br>b = 12.640(2) Å    β = 92.048(3)°<br>c = 13.195(2) Å    γ = 103.570(4)° |
| Volume                            | 1496.4(5) Å <sup>3</sup>                                                                                       |
| Z                                 | 2                                                                                                              |
| Density (calculated)              | 1.313 Mg/m <sup>3</sup>                                                                                        |
| Absorption coefficient            | 0.153 mm <sup>-1</sup>                                                                                         |
| F(000)                            | 624                                                                                                            |
| Crystal size                      | 0.07 x 0.06 x 0.05 mm <sup>3</sup>                                                                             |
| Theta range for data collection   | 1.610 to 27.809°                                                                                               |
| Index ranges                      | -12 ≤ h ≤ 12, -16 ≤ k ≤ 11, -17 ≤ l ≤ 16                                                                       |
| Reflections collected             | 12556                                                                                                          |
| Independent reflections           | 7003 [R(int) = 0.0512]                                                                                         |
| Completeness to theta = 25.242°   | 99.9 %                                                                                                         |
| Absorption correction             | Semi-empirical from equivalents                                                                                |
| Max. and min. transmission        | 0.7456 and 0.6465                                                                                              |
| Refinement method                 | Full-matrix least-squares on F <sup>2</sup>                                                                    |
| Data / restraints / parameters    | 7003 / 0 / 389                                                                                                 |
| Goodness-of-fit on F <sup>2</sup> | 0.927                                                                                                          |
| Final R indices [I > 2σ(I)]       | R1 = 0.0565, wR2 = 0.1098                                                                                      |
| R indices (all data)              | R1 = 0.1479, wR2 = 0.1415                                                                                      |

|                             |                                       |
|-----------------------------|---------------------------------------|
| Extinction coefficient      | n/a                                   |
| Largest diff. peak and hole | 0.262 and -0.325 e. $\text{\AA}^{-3}$ |
